# Supplementary material for: Effect of wheelchair-modified rowing exercise on cardiometabolic risk factors in spinal cord injured wheelchair users: protocol for a randomised controlled trial
Source: PubMed Central journal article supplement — BMJ Open. 2020 Oct 16;10(10):e040727. doi: 10.1136/bmjopen-2020-040727 (PMC7569950; doi:10.1136/bmjopen-2020-040727), 2020-10-16
Supplement: bmjopen-2020-040727.draft_revisions.pdf [file bmjopen-2020-040727.draft_revisions.pdf]

# BMJ Open

BMJ Open is committed to open peer review. As part of this commitment we make the peer review history of every article we publish publicly available.

When an article is published we post the peer reviewers' comments and the authors' responses online. We also post the versions of the paper that were used during peer review. These are the versions that the peer review comments apply to.

The versions of the paper that follow are the versions that were submitted during the peer review process. They are not the versions of record or the final published versions. They should not be cited or distributed as the published version of this manuscript.

BMJ Open is an open access journal and the full, final, typeset and author-corrected version of record of the manuscript is available on our site with no access controls, subscription charges or pay-per-view fees (<http://bmjopen.bmj.com>).

If you have any questions on BMJ Open's open peer review process please email [info.bmjopen@bmj.com](mailto:info.bmjopen@bmj.com)

# BMJ Open

## Effect of wheelchair-modified rowing exercise on cardiometabolic risk factors in spinal cord injured wheelchair users – Protocol for a randomized controlled trial

|                               |                                                                                                                                                                                                                                                                                                                                                                                                                                                                                                                                                                                                                                                                                                                   |
|-------------------------------|-------------------------------------------------------------------------------------------------------------------------------------------------------------------------------------------------------------------------------------------------------------------------------------------------------------------------------------------------------------------------------------------------------------------------------------------------------------------------------------------------------------------------------------------------------------------------------------------------------------------------------------------------------------------------------------------------------------------|
| Journal:                      | <i>BMJ Open</i>                                                                                                                                                                                                                                                                                                                                                                                                                                                                                                                                                                                                                                                                                                   |
| Manuscript ID                 | bmjopen-2020-040727                                                                                                                                                                                                                                                                                                                                                                                                                                                                                                                                                                                                                                                                                               |
| Article Type:                 | Protocol                                                                                                                                                                                                                                                                                                                                                                                                                                                                                                                                                                                                                                                                                                          |
| Date Submitted by the Author: | 20-May-2020                                                                                                                                                                                                                                                                                                                                                                                                                                                                                                                                                                                                                                                                                                       |
| Complete List of Authors:     | Hansen, Rasmus; Aalborg Universitet, Health Science and Technology, Sport Sciences – Performance and Technology; Professionshøjskolen University College Nordjylland, Research and Innovation<br>Samani, Afshin; Aalborg Universitet, Health Science and Technology, Sport Sciences – Performance and Technology<br>Laessø, Uffe; Professionshøjskolen University College Nordjylland, Physiotherapy; Professionshøjskolen University College Nordjylland, Research and Innovation<br>Handberg, Aase; Aalborg University Hospital, Clinical Biochemistry; Aalborg Universitet, Clinical Medicine<br>Larsen, Ryan; Aalborg Universitet, Health Science and Technology, Sport Sciences – Performance and Technology |
| Keywords:                     | REHABILITATION MEDICINE, Physiology < NATURAL SCIENCE DISCIPLINES, Coronary heart disease < CARDIOLOGY, Neurological injury < NEUROLOGY, PUBLIC HEALTH, ULTRASONOGRAPHY                                                                                                                                                                                                                                                                                                                                                                                                                                                                                                                                           |
|                               |                                                                                                                                                                                                                                                                                                                                                                                                                                                                                                                                                                                                                                                                                                                   |

SCHOLARONE™  
Manuscripts

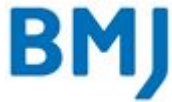

I, the Submitting Author has the right to grant and does grant on behalf of all authors of the Work (as defined in the below author licence), an exclusive licence and/or a non-exclusive licence for contributions from authors who are: i) UK Crown employees; ii) where BMJ has agreed a CC-BY licence shall apply, and/or iii) in accordance with the terms applicable for US Federal Government officers or employees acting as part of their official duties; on a worldwide, perpetual, irrevocable, royalty-free basis to BMJ Publishing Group Ltd ("BMJ") its licensees and where the relevant Journal is co-owned by BMJ to the co-owners of the Journal, to publish the Work in this journal and any other BMJ products and to exploit all rights, as set out in our [licence](#).

The Submitting Author accepts and understands that any supply made under these terms is made by BMJ to the Submitting Author unless you are acting as an employee on behalf of your employer or a postgraduate student of an affiliated institution which is paying any applicable article publishing charge ("APC") for Open Access articles. Where the Submitting Author wishes to make the Work available on an Open Access basis (and intends to pay the relevant APC), the terms of reuse of such Open Access shall be governed by a Creative Commons licence – details of these licences and which [Creative Commons](#) licence will apply to this Work are set out in our licence referred to above.

Other than as permitted in any relevant BMJ Author's Self Archiving Policies, I confirm this Work has not been accepted for publication elsewhere, is not being considered for publication elsewhere and does not duplicate material already published. I confirm all authors consent to publication of this Work and authorise the granting of this licence.

1  
2  
3  
4 1 **Cover Letter**

5  
6 2 **Effect of wheelchair-modified rowing exercise on cardiometabolic risk factors in spinal cord injured**  
7  
8 3 **wheelchair users – Protocol for a randomized controlled trial**  
9

10 4 Version: 1.0. Date: 20.05.2020.

11  
12  
13 5 Dear Madam/Sir,

14  
15 6 We hereby submit this protocol manuscript for consideration for publication in BMJ Open because we think  
16 7 this study protocol is relevant to the focus of your journal.

17  
18 8 This research will determine if upper-body rowing, complying with the new exercise training guidelines (30  
19 9 minutes of moderate-to-vigorous intensity aerobic exercise, three times a week), is feasible and effective in  
20 10 reducing cardiometabolic risk in the spinal cord injured population. The results from this study will therefore  
21 11 provide novel information that can inform future intervention studies in spinal cord injured individuals.

22  
23 12 Recruitment of participants are planned to be commenced in September 2020.

24  
25  
26 13 On behalf of all authors, I, as a corresponding author, hereby declare that 1) the submitted manuscript have  
27 14 not been published elsewhere or are not being considered for publication elsewhere; and 2) the research  
28 15 reported will not be submitted for publication elsewhere until a final decision has been made as to its  
29 16 acceptability in the BMJ Open.

30  
31  
32  
33  
34 17  
35  
36 18 Yours sincerely

37 19 Rasmus Kopp Hansen, PhD student, MSc

38  
39  
40 20  
41  
42 21 Rasmus Kopp Hansen, MSc<sup>1,2</sup> [rkopp@hst.aau.dk](mailto:rkopp@hst.aau.dk), <https://orcid.org/0000-0001-8515-8779>

43 22 Afshin Samani, PhD<sup>1</sup> [afsamani@hst.aau.dk](mailto:afsamani@hst.aau.dk), <https://orcid.org/0000-0001-6119-8231>

44 23 Uffe Laessoe, PhD<sup>2</sup> [ufl@ucn.dk](mailto:ufl@ucn.dk), <https://orcid.org/0000-0001-5388-1671>

45 24 Aase Handberg, DMSc, MD<sup>3,4</sup> [aaha@rn.dk](mailto:aaha@rn.dk), <https://orcid.org/0000-0001-5719-203X>

46 25 Ryan Godsk Larsen, PhD<sup>1</sup> [rl@hst.aau.dk](mailto:rl@hst.aau.dk), <https://orcid.org/0000-0002-4622-1453>

47  
48  
49  
50 26  
51 27 <sup>1</sup>Department of Health Science and Technology, Sport Sciences – Performance and Technology, Aalborg  
52 28 University, Aalborg, Denmark

53 29 <sup>2</sup>Department of Physiotherapy / Research and Innovation, University College of Northern Denmark,  
54 30 Aalborg, Denmark

55 31 <sup>3</sup>Department of Clinical Biochemistry, Aalborg University Hospital, Aalborg, Denmark  
56  
57  
58  
59  
60

1  
2  
3  
4  
5  
6  
7  
8  
9  
10  
11  
12  
13  
14  
15  
16  
17  
18  
19  
20  
21  
22  
23  
24  
25  
26  
27  
28  
29  
30  
31  
32  
33  
34  
35  
36  
37  
38  
39  
40  
41  
42  
43  
44  
45  
46  
47  
48  
49  
50  
51  
52  
53  
54  
55  
56  
57  
58  
59  
60

32 <sup>4</sup>*Department of Clinical Medicine, Aalborg University, Aalborg, Denmark*

33

34 **Keywords**

35 Spinal cord injuries; Exercise; Rowing; Cardiovascular; Risk factors; Metabolic health; Shoulder pain;  
36 Physical activity; Inflammation; Aerobic capacity

37

38

39 Type of article: Protocol

40 Word count main text: 5881

41 Number of tables and figures: 1 figure.

42 Number of references: 104

43

44

45

46

47

48

49

50

51

52

53

54

55

56

57

58

59

60

For peer review only

1  
2  
3  
4 56 **Effect of wheelchair-modified rowing exercise on cardiometabolic risk factors in spinal cord**  
5  
6 57 **injured wheelchair users – Protocol for a randomized controlled trial**  
7

8 58 Rasmus Kopp Hansen, MSc<sup>1,2</sup>, Afshin Samani, PhD<sup>1</sup>, Uffe Laessoe, PhD<sup>2</sup>, Aase Handberg, DMSc, MD<sup>3,4</sup>,  
9  
10 59 Ryan Godsk Larsen, PhD<sup>1</sup>  
11  
12 60

13  
14 61 *<sup>1</sup>Department of Health Science and Technology, Sport Sciences – Performance and Technology, Aalborg*  
15 62 *University, Aalborg, Denmark*

16  
17 63 *<sup>2</sup>Department of Physiotherapy / Research and Innovation, University College of Northern Denmark,*  
18 64 *Aalborg, Denmark*

19  
20 65 *<sup>3</sup>Department of Clinical Biochemistry, Aalborg University Hospital, Aalborg, Denmark*

21  
22 66 *<sup>4</sup>Department of Clinical Medicine, Aalborg University, Aalborg, Denmark*  
23

24 67 **Corresponding author:**

25 68 Rasmus Kopp Hansen, MSc.

26  
27 69 Department of Health Science and Technology, Sports Sciences – Performance and Technology

28  
29 70 Aalborg University

30 71 Niels Jernes Vej 12, A5-209

31  
32 72 DK-9220 Aalborg

33  
34 73 Denmark

35 74 Telephone: +4520892317  
36  
37 75  
38  
39 76  
40  
41 77  
42  
43 78  
44  
45 79  
46  
47 80  
48  
49 81  
50  
51 82  
52  
53 83  
54  
55 84  
56  
57  
58  
59  
60

## 85 **ABSTRACT**

### 86 **Introduction**

87 Cardiovascular and metabolic diseases are a growing concern for spinal cord injured (SCI) individuals.  
88 Physical inactivity contributes to cardiometabolic morbidity and mortality in the SCI population. However,  
89 previous studies have shown mixed results regarding the effects of exercise on cardiometabolic risk factors  
90 in SCI individuals. This discrepancy could be influenced by insufficient exercise stimuli. Recent guidelines  
91 recommend 30 minutes of moderate-to-vigorous intensity aerobic exercise, three times a week, for  
92 improvement in cardiometabolic health in SCI individuals. However, to date, no studies have implemented  
93 an exercise intervention matching the new recommendations to examine the effects on cardiometabolic risk  
94 factors. Therefore, the primary objective of this study is to determine the effects of 12-weeks of wheelchair  
95 user-modified upper-body rowing exercise on both traditional (constituents of the metabolic syndrome) and  
96 novel (e.g. vascular structure and function) cardiometabolic risk factors in SCI manual wheelchair users.

### 97 **Methods and analysis**

98 A randomized controlled trial will compare 12-weeks of upper-body rowing exercise, 30 minutes three times  
99 per week, with a control group continuing their normal lifestyle. Outcome measurements will be performed  
100 immediately before (baseline), after 12 weeks of training (post), and 6 months after the termination of the  
101 intervention period (follow up). Outcomes will include inflammatory and metabolic biomarkers determined  
102 from venous blood (with serum fasting insulin as primary outcome), body composition, arterial blood  
103 pressure, cardiorespiratory fitness level, brachial artery vascular structure and function, and autonomic  
104 nervous system function.

### 105 **Ethics and dissemination**

106 This trial is reported to the Danish Data Protection Agency (J.nr. 2019-899/10-0406) and approved by the  
107 Committees on Health Research Ethics in The North Denmark Region (Journal-nr. N-20190053). The  
108 principal investigator will collect written informed consent from all participants prior to inclusion.  
109 Irrespective of study outcomes, the results will be submitted to peer-reviewed scientific journals for  
110 publication.

### 111 **Trial registration number**

112 NCT04390087.

## 114 **ARTICLE SUMMARY**

### 115 **Strengths and limitations of this study**

- 1  
2  
3  
4 116 • The frequency, duration and intensity of the exercise intervention follows recently published  
5  
6 117 exercise recommendations for SCI individuals.  
7  
8 118 • This study uses a randomized controlled design to examine the effects of a novel exercise modality  
9 119 on both traditional and novel cardiometabolic risk factors.  
10  
11 120 • The exercise modality (upper-body rowing) includes not only an aerobic component, but also an  
12 121 element of resistance training for the posterior shoulder region, potentially ameliorating shoulder  
13 122 pain.  
14 123 • Lack of control of food intake is a study limitation.  
15  
16 123  
17  
18 124  
19  
20 125  
21  
22 126  
23  
24 127  
25  
26 128  
27  
28 129  
29  
30 130  
31  
32 131  
33  
34 132  
35  
36 133  
37  
38 134  
39  
40 135  
41  
42 136  
43  
44 137  
45  
46 138  
47  
48 139  
49  
50 140  
51  
52 141  
53  
54 142  
55  
56  
57  
58  
59  
60
- The frequency, duration and intensity of the exercise intervention follows recently published exercise recommendations for SCI individuals.
  - This study uses a randomized controlled design to examine the effects of a novel exercise modality on both traditional and novel cardiometabolic risk factors.
  - The exercise modality (upper-body rowing) includes not only an aerobic component, but also an element of resistance training for the posterior shoulder region, potentially ameliorating shoulder pain.
  - Lack of control of food intake is a study limitation.

For peer review only



## 1 2 3 4 143 **INTRODUCTION**

5  
6 144 Spinal cord injured (SCI) wheelchair users are placed at the lowest end of the fitness continuum <sup>1</sup>. Thus  
7  
8 145 cardiovascular disease and metabolic dysfunction is a growing concern in this population <sup>2,3</sup>. In recent years,  
9  
10 146 cardiovascular disease has emerged as the leading cause of mortality in chronic SCI individuals <sup>4</sup>. Factors  
11 147 contributing to high cardiometabolic morbidity and mortality in the SCI population are sedentary lifestyle  
12  
13 148 and low physical activity level <sup>5</sup>, and the ensuing negative influence on body composition, reflected by lower  
14 149 fat-free mass and larger amount of adipose tissue <sup>6</sup>. Explanations for the adoption of a sedentary lifestyle are  
15  
16 150 multifactorial, but studies have identified intrapersonal and socio-environmental physical activity barriers in  
17  
18 151 SCI wheelchair users <sup>7-9</sup>. Some barriers such as the intrapersonal barriers of lack of time<sup>10</sup> or energy<sup>11</sup>  
19 152 identified by individuals with mobility disabilities are consistent with those reported in the non-disabled  
20  
21 153 population. Other barriers are specific to the mobility disabled individuals, such as organizational or  
22 154 structural barriers (e.g. lack of accessible fitness centers<sup>7</sup> and adaptive exercise equipment<sup>8</sup>) and community  
23  
24 155 built environment barriers<sup>12</sup>. Consequently, new approaches to support the initiation and perseverance of  
25 156 physical activity in this population are required.

26  
27  
28 157 The majority of previous exercise intervention studies have used isolated aerobic exercise, often in the form  
29 158 of arm-cranking exercise <sup>13</sup>. These studies have demonstrated improvements in traditional risk factors for  
30  
31 159 cardiometabolic diseases, such as high-density cholesterol (HDL-C) <sup>14</sup>, fasting insulin <sup>15</sup>, and indices of  
32 160 insulin resistance <sup>16</sup>, whereas the effects on arterial blood pressure <sup>17</sup>, blood lipids (e.g. low-density  
33  
34 161 cholesterol (LDL-C) and triacylglycerol) are inconclusive <sup>15,18,17</sup>. Moreover, the effects of exercise  
35  
36 162 interventions on body composition are generally lacking <sup>19</sup>. The explanation for the lack of an exercise effect  
37 163 on some of these risk factors is not clear, but could be related to insufficient volume <sup>15,17</sup> or intensity <sup>19</sup> of  
38  
39 164 exercise, performed with limited amount of skeletal muscle mass.

40  
41 165 Notably, in able-bodied individuals, the exercise-induced risk reduction in cardiovascular diseases cannot be  
42 166 fully explained by traditional risk factors (i.e. there is a risk factor gap) <sup>20</sup>. As a consequence, studies have  
43  
44 167 started to focus on the effects of exercise on changes in the vascular wall <sup>20</sup>. It is known that dysfunction of  
45  
46 168 the vascular endothelium occurs at the very early phases of atherosclerosis <sup>21</sup>. For instance, flow-mediated  
47 169 dilation (FMD), a non-invasive measure of nitric oxide (NO) dependent endothelial function <sup>22</sup>, is a strong  
48  
49 170 predictor of future cardiovascular events <sup>23</sup>. In addition, carotid intima media thickness (IMT), a measure of  
50  
51 171 vessel wall thickness <sup>24</sup> has shown to be associated with future vascular events, such as the occurrence of  
52 172 stroke and myocardial infarction <sup>24</sup>. Accumulating evidence in able-bodied demonstrates beneficial effects of  
53  
54 173 exercise on structural and functional adaptations of the vasculature <sup>25</sup>. However, little is known about the  
55 174 effects of exercise on the vasculature in the SCI population.

56  
57 175 Reductions in femoral artery (lower body) diameter occurs rapidly in response to extreme inactivity, as  
58  
59 176 observed within three weeks off acquiring a SCI <sup>26</sup>. De Groot et al. <sup>27</sup> found similar FMD in the brachial  
60

1  
2  
3  
4 177 artery among untrained SCI when compared to able-bodied individuals, however when FMD was normalized  
5  
6 178 to the shear stress stimulus, the dilation response was reduced in the SCI group, indicating some degree of  
7  
8 179 endothelial dysfunction in this population<sup>28</sup>. Other observational studies have demonstrated both larger  
9  
10 180 conduit artery diameter and blood flow in the subclavian artery<sup>29</sup>, and larger brachial diameter<sup>27</sup> in  
11  
12 181 wheelchair athletes compared to non-athlete able-bodied controls. Together these findings indicate that  
13  
14 182 remodeling of the vasculature also occurs in response to regular exercise in SCI wheelchair users. However,  
15  
16 183 the causal link between adaptations of the upper body arteries and repetitive exercise stimulus in SCI is not  
17  
18 184 fully established. Therefore, the relationship between exercise and vascular remodeling in wheelchair users  
19  
20 185 needs to be determined through controlled exercise studies. A recent experimental study consisting of  
21  
22 186 supervised aerobic exercise (20min, twice per week), adhering to the earlier exercise guidelines for SCI  
23  
24 187 adults<sup>30</sup>, was successful in improving measures of cardiorespiratory fitness and muscle strength<sup>31</sup>. Yet,  
25  
26 188 Zepetnek et al.<sup>17</sup> demonstrated that this exercise paradigm (20min, twice per week) did not improve markers  
27  
28 189 of cardiovascular disease risk, including carotid IMT and brachial FMD. Recent guidelines recommend at  
29  
30 190 least 30 min of moderate-to-vigorous intensity aerobic exercise, three times per week in order to improve  
31  
32 191 cardiometabolic health in SCI wheelchair users<sup>32</sup>, suggesting that insufficient exercise stimuli may explain  
33  
34 192 the lack of vascular adaptations in the study by Zepetnek et al.<sup>17</sup>. Notably, to date, no studies have examined  
35  
36 193 the effects of the updated exercise guidelines (30 min of moderate-to-vigorous intensity aerobic exercise,  
37  
38 194 three times per week) on vascular adaptations in SCI manual wheelchair users.

33 195 While isolated aerobic exercise, via arm-cranking or wheelchair ergometry, evokes positive effect on  
34  
35 196 cardiorespiratory fitness, these modalities/types of exercises fail to address the importance of strengthening  
36  
37 197 the posterior shoulder musculature of the upper-extremity<sup>33</sup>. In addition, these modalities use repetitive  
38  
39 198 contractions of the shoulder musculature engaged in daily wheelchair propulsion activities, thereby  
40  
41 199 increasing the risk of developing shoulder pain<sup>34-36</sup>. Studies have reported high prevalence of shoulder pain  
42  
43 200 in long-term wheelchair users<sup>37,38</sup>, which prevents these individuals from engaging in physical activity<sup>39</sup>. As  
44  
45 201 wheelchair users rely on their upper-extremities for most daily activities, upper-extremity pain must be  
46  
47 202 prevented or limited to preserve function, independence and quality of life (QOL)<sup>16,40</sup>. Indeed, health related  
48  
49 203 QOL is lower in SCI adults compared with the able-bodied population<sup>41,42</sup>. The development of shoulder  
50  
51 204 pain has been suggested to occur due to chronic overuse, shoulder strength imbalances between anterior and  
52  
53 205 posterior musculature, postural changes and impingement syndrome<sup>43-45</sup>. Considering the general need for  
54  
55 206 strong upper extremities to bear weight during different transfer tasks<sup>46</sup>, to propel wheelchair<sup>47</sup>, and to reach  
56  
57 207 overhead levels<sup>48</sup>, the inclusion of resistance training in exercise training paradigms seems prudent. One  
58  
59 208 modality that combines aerobic and resistance components is rowing<sup>49</sup>. Specifically, it has been shown that  
60  
209 wheelchair user-modified upper-body rowing ergometry challenges the cardiovascular system comparable to  
210  
211 arm-cranking<sup>34</sup>. Additionally, upper-body rowing mirrors the muscle activation observed during traditional  
resistance training for the scapular retractors<sup>50</sup>. Earlier research has demonstrated beneficial effects of

1  
2  
3  
4  
5  
6  
7  
8  
9  
10  
11  
12  
13  
14  
15  
16  
17  
18  
19  
20  
21  
22  
23  
24  
25  
26  
27  
28  
29  
30  
31  
32  
33  
34  
35  
36  
37  
38  
39  
40  
41  
42  
43  
44  
45  
46  
47  
48  
49  
50  
51  
52  
53  
54  
55  
56  
57  
58  
59  
60

resistance training of the posterior shoulder and scapular retractor musculature on shoulder pain<sup>40,48,51</sup>. Thus, the use of upper-body rowing ergometry may evoke positive effects on both cardiometabolic health and shoulder pain, the latter through alterations in posterior vs. anterior upper-body muscle strength balance. However, to date, no studies have implemented upper-body rowing ergometry as exercise modality in manual wheelchair users.

## Objectives

The primary objective of this study is to determine the effects of 12-weeks of wheelchair user-modified upper-body rowing on both traditional (insulin resistance, obesity, dyslipidemia (including low HDL-C and elevated triglycerides, and blood pressure) and novel (inflammatory status, autonomic nervous system function, vascular structure and function, and cardiorespiratory fitness level) cardiometabolic risk factors in SCI manual wheelchair users. As secondary objectives, we will investigate the effects of the exercise intervention on free-living physical activity, shoulder pain, indices of QOL, and feasibility of the intervention.

## METHODS AND ANALYSIS

### Study design

A randomized controlled trial designed to determine the effects of 12 weeks of exercise training on cardiometabolic risk, indices of QOL, and shoulder pain, will be conducted in accordance with the Standard Protocol Items: Recommendations for Interventional Trials (SPIRIT) statement<sup>52</sup>. The trial is registered as a controlled trial (NCT04390087). The study overview is presented in Figure 1. After giving written informed consent to participate in the study, participants will undergo baseline testing, after which they will be randomly assigned to either a control group or an exercise group (allocation ratio, 1:1), stratified for age and gender. Randomization will be conducted using a computer-generated random number sequence (<https://www.randomizer.org/>). Outcome measurements will be performed immediately before (baseline), after 12 weeks of training (post), and 6 months after the termination of the intervention period (follow up). This approach allows for assessment of the short term effects of exercise training as well as any residual effects from the training intervention on cardiometabolic risk, shoulder pain, indices of QOL, and free-living physical activity (i.e. leisure-time physical activity and activities of daily living<sup>53</sup>).

### Participants

#### *Inclusion criteria*

Men and women; aged 18-65 years; chronic SCI ( $\geq 1$  year since injury); individuals with sufficient sparing of arm function to participate in upper-body rowing (i.e. as a minimum excluding individuals with complete SCI at or above C5); using a manual wheelchair as a primary tool for mobility. Volunteers will be asked to

1  
2  
3  
4 245 self-report SCI level and completeness and to provide a copy of the part of their medical records that confirm  
5  
6 246 injury level and American Spinal Injury Association (ASIA) impairment scale classification before any  
7  
8 247 measurements are commenced. As part of the screening, participants will also be asked to indicate smoking  
9 248 habits, known medical issues, diseases or use of medication that could affect metabolism (e.g. statins or  
10  
11 249 metformin) or the cardiovascular system (e.g. diuretics, beta blockers, or angiotensin-converting enzyme  
12 250 inhibitors).

#### 14 251 *Exclusion criteria*

16  
17 252 Individuals who regularly engage in >150 min/week of moderate-to-vigorous intensity physical activity;  
18 253 have received a cortisone injection in the shoulder within the last four months; have had shoulder injury  
19  
20 254 within the previous year; known medical issues (urinary tract infections, cardiovascular contraindications for  
21 255 exercise testing, and pressure sores); diagnosed diabetes or any other disease that may limit the ability to  
22  
23 256 perform exercise.

#### 25 257 **Recruitment**

26  
27 258 Participants will be recruited through notices at Aalborg University, websites seeking volunteers for research  
28  
29 259 studies (e.g., [www.forsog.dk](http://www.forsog.dk)), organizations related to disability and SCI, including the Spinal Cord Injured  
30 260 in Denmark organization, physician clinics, wheelchair manufacturing company (Wolturnus A/S) and local  
31 261 community groups. Information on websites, social media, posters, flyers will be used to reach potential  
32 262 participants. This kind of participant recruitment can be considered passive since the participants have to  
33 263 choose to react on the study information<sup>54</sup>. This approach increases the risk of over representing individuals  
34 264 who are interested in the research area<sup>54</sup>. Considering this risk of selection bias, physician clinic visits from  
35 265 the principal investigator (i.e. active recruitment) will be used as an additional strategy to reach potential  
36 266 participants. For this study, 30 participants will be recruited. The sample size is based on the effect size  
37  
38 267 (Cohen *d*: -0.69) for changes in fasting insulin after 6 weeks of arm-cycling exercise<sup>15</sup>. With a power of 0.9,  
39 268 and an alpha level of 0.05, 20 participants in total are required to detect a significant change. To account for  
40 269 drop-outs during the 12 week intervention, as well as potential drop-outs in the control group, 30 participants  
41 270 will be included in the project, with n=15 allocated to the control and exercise group, respectively.

#### 48 271 **Intervention**

##### 49 272 *Exercise group*

51  
52 273 Volume, intensity and frequency of the intervention is based on recent exercise recommendations for SCI  
53 274 individuals<sup>32</sup>. Consequently, the training will be performed for 30 min, 3 times per week with moderate-to-  
54 275 vigorous intensity, with at least one rest day between sessions. Low compliance rate is a general issue in SCI  
55 276 exercise studies<sup>55</sup>. Compared with continuous exercise, interval-based exercise have been reported to elicit  
56 277 higher enjoyment in SCI individuals<sup>56</sup>, which may increase exercise compliance. Considering this difference  
57  
58  
59  
60

1  
2  
3  
4 278 between continuous and interval-based exercise, the target duration of 30 min will be reached through  
5  
6 279 accumulation of 5-min bouts (up to 6 bouts), with 1-2 min of rest between each bout. Due to the training  
7  
8 280 status of the participants, it is expected that some participants will not be able to exercise for 30 min with the  
9  
10 281 intended intensity. Accordingly, exercise duration will be tailored to each participant's physical capacity<sup>57</sup>  
11  
12 282 by gradually increasing the duration (i.e. the number of 5-min bouts) over the weeks towards the targeted 30  
13  
14 284 (RPE) corresponding to 12-15 on the 'Borg 6-20 RPE Scale'<sup>58,59</sup>. The validity of using RPE to control  
15  
16 285 moderate and vigorous exercise intensity has been demonstrated in SCI individuals<sup>60</sup>. During the first visit,  
17  
18 286 participants will be familiarized with the RPE scale<sup>61</sup> and receive detailed instructions on the use of RPE and  
19  
20 287 how to rate the overall exertion based on an integration of central and peripheral sensations of effort<sup>60</sup>. Some  
21  
22 288 controversy exists about the validity of using overall RPE to monitor exercise intensity<sup>61,62</sup>, as the  
23  
24 289 relationships between overall RPE and objective physiological markers such as oxygen consumption (VO<sub>2</sub>),  
25  
26 291 heart rate (HR) and ventilation (VE) in SCI individuals have been questioned<sup>62</sup>. This have led some  
27  
28 292 researchers to use a differentiated RPE scale that distinguishes between central (cardiorespiratory sensations)  
29  
30 294 and peripheral (peripheral working limbs) sensations<sup>63</sup>. However, the current evidence does not indicate  
31  
32 295 greater validity for differentiated RPE compared with overall RPE<sup>61</sup>, and therefore overall RPE will be used  
33  
34 296 to guide exercise intensity.

35  
36 297 Each training session will consist of aerobic exercise performed on a wheelchair-modified upper-body  
37  
38 298 rowing ergometer (Concept 2, Morrisville, Vermont, USA). Due to the pulling motion of the upper-body  
39  
40 300 during rowing, this modality also includes a component of resistance exercise<sup>49</sup>. The modification of the  
41  
42 301 ergometer is made by separating it into two parts using an Adapt2row<sup>1</sup>, allowing the participants to sit in  
43  
44 302 their wheelchair while performing upper-body rowing. Wedges will be positioned under the rear wheels to  
45  
46 303 keep the wheelchair in place. Further, in case of SCI related insufficient innervation of torso musculature,  
47  
48 305 straps will be wrapped around the back of the wheelchair and around the trunk of the participant, thereby  
49  
50 306 securing the participant to the wheelchair. A pilot study<sup>34</sup> has provided promising results regarding the  
51  
52 307 feasibility of using adaptive upper-body rowing exercise in the SCI population. Participants will be asked to  
53  
54 308 empty their bladder before each training session. Average power output (W) will be recorded during each  
55  
56 310 exercise session to monitor training load and quantify progress in work capacity.

57  
58  
59 306 All exercise sessions will be supervised by the principal investigator, who is an exercise physiologist, or by  
60  
307 sport science students to ensure proper assistance and guidance of the participants. Everyone involved in  
308 supervision will be thoroughly instructed in how to supervise correct exercise technique, and they will  
309 receive general knowledge about SCI and wheelchair use. To allow for some flexibility regarding scheduling  
310 conflicts, participants will have opportunity to exercise 2-4 days per week, with a target of 3 days per week.

---

<sup>1</sup> <http://www.adapt2row.com/>

1  
2  
3  
4 311 That is, in case of a missing session one week, an additional training session can be included the following  
5  
6 312 week. However, to secure adequate recovery, no more than four training days per week will be allowed. The  
7  
8 313 intervention will be terminated after 12 weeks, irrespective of any missing training sessions.

#### 9 10 314 *Control group*

11  
12 315 The participants allocated to the control group will be asked to maintain their normal lifestyle throughout the  
13  
14 316 intervention period. When the 6-months follow-up testing has been terminated, the control group will receive  
15  
16 317 information about the exercise guidelines and the benefits of physical activity. Additionally, if requested, the  
17  
18 318 principal investigator will organize contact to facilities where participants in the control group can perform  
19  
20 319 adapted rowing.

#### 21 320 **Main trial day protocol**

22 321 The experimental procedures will be similar at baseline, post intervention, and at follow-up 6 months later.  
23  
24 322 To account for within-day variation, the procedures will be performed at the same time of day for each  
25  
26 323 participant. Participants will arrive at the exercise laboratory at Aalborg University for testing. Participants  
27  
28 324 will be asked to refrain from any strenuous exercise (>24 h), caffeine, alcohol, polyphenols, vitamin C, and  
29  
30 325 supplements known to affect the cardiovascular system (>12 h), and attend in a fasted (>6 h) state.<sup>64</sup> Any  
31  
32 326 smokers must abstain from smoking for >6 h prior to each visit<sup>64</sup>. If participants are taking medication, a  
33  
34 327 wash-out period of at least 4-5 times the half-life of the drug (typically 24-48 h) will be used. If a drug  
35  
36 328 cannot be withdrawn due to health issues, testing will be performed after a consistent time period after  
37  
38 329 intake, as recommended for studies examining vascular function<sup>64,65</sup>. On trial days, participants will receive  
39  
40 330 a standardized snack (energy bar) after completion of the FMD measurement. Participants will be asked to  
41  
42 331 empty their bladder before any testing is commenced, and are allowed to drink water ad libitum during the  
43  
44 332 test days.

45  
46 333  
47  
48 334 INSERT FIGURE 1

#### 49 335 **Blood collection procedure**

50 336 After an overnight fast (i.e.  $\geq 10$  hours of fasting), participants will have approximately 20 mL blood drawn  
51  
52 337 from a peripheral vein. Blood samples will be aliquoted and stored at  $-80^{\circ}$  at the Department of Clinical  
53  
54 338 Biochemistry, Aalborg University Hospital, until analyses. Blood samples will be analyzed for indicators of  
55  
56 339 cardiometabolic health (markers of glucose homeostasis, dyslipidemia, non-alcoholic fatty liver disease  
57  
58 340 (NAFLD), and prothrombotic risk) as well as inflammatory markers (pro- and anti-inflammatory markers).  
59  
60 341 Blood sampling will be conducted within a week prior to commencing the intervention (baseline), between  
61  
62 342 36 and 60 hours after the last exercise session (post) to minimize any effects from the last exercise session,  
63  
64 343 and 6 month after the termination of the intervention (6-months follow-up).

1  
2  
3  
4 344 **Outcome measures**

5  
6 345 ***Primary outcome***

8 346 The primary outcome is fasting insulin, since it is one of the hallmarks of the metabolic syndrome<sup>66,67</sup>, and  
9  
10 347 has shown to be modifiable with exercise training in SCI individuals<sup>15</sup>.

11  
12 348 ***Secondary key outcomes***

13  
14 349 ***Arterial blood pressure (BP) and resting heart rate (HR)***

15  
16 350 After resting for 10 min, participants will have their resting systolic and diastolic BP and HR measured with  
17 351 an automated BP monitoring device (OMRON M6, OMRON Healthcare, Hoofddorp, Netherlands).

18  
19 352 Measurements will be performed twice, with participants in sitting position. The lowest values will be used  
20 353 for further analyses.

21  
22  
23 354 ***Body composition***

24  
25 355 Participants will have their body mass measured while sitting in their wheelchair (wearing light clothing)  
26 356 using a platform wheelchair scale (Detecto® 6550 wheelchair scale, Webb City, MO, USA). Body mass will  
27 357 be derived by subtracting the weight of the wheelchair from the total mass and rounded to the nearest 0.1 kg

28 358<sup>68</sup>. Supine height (cm) will be measured in supine position using non-elastic tape. For participants with  
29 359 contractures precluding stretching of the legs, length will be measured in segments from heel to top of the  
30 360 skull<sup>69</sup>. Body mass index (BMI) will be calculated as weight (kg) divided by height squared (m<sup>2</sup>). Waist  
31 361 circumference and waist-to-hip circumference ratio will be used as a surrogate for visceral adiposity<sup>68-70</sup>.

32 362 Participants will have their waist and hip circumference measured in supine position following a deep  
33 363 expiration. Waist and hip circumference will be measured immediately below the lowest rib<sup>69</sup> and widest  
34 364 part of the trochanters<sup>70</sup>, respectively. For all circumference measurements, the tape will be placed directly  
35 365 on the skin with the participants arms by the side<sup>69</sup>. Anthropometric measures will be taken in duplicate  
36 366 (height, waist and hip circumference), rounded to the nearest 0.1 cm and reported as the mean. If the  
37 367 difference between the first and second measure is >0.1 cm, a third measure will be obtained.<sup>69</sup>

38  
39 368 ***Autonomic nervous system function***

40 369 Increasing evidence suggest that autonomic dysfunction accentuates the risk for adverse cardiovascular  
41 370 events<sup>71</sup>. Individuals with SCI are prone to autonomic disturbances as a consequence of disruption to the  
42 371 spinal cord<sup>72</sup>, placing them at increased risk for autonomic related cardiovascular diseases. Participants will  
43 372 be equipped with a 4-lead surface electrodes on their chest and have their electrocardiogram (ECG) recorded  
44 373 during 5 min of quiet rest. Heart rate variability analyses of the ECG will be used to assess autonomic  
45 374 function<sup>71,73</sup>.

46  
47 375 ***Vascular structure and function***

48  
49  
50  
51  
52  
53  
54  
55  
56  
57  
58  
59  
60

1  
2  
3  
4 376 After a rest period of 10-15 min in a quiet and darkened room, vascular structure and function will be  
5  
6 377 evaluated non-invasively using ultrasonography (LOGIQ S8 XDclear, GE Healthcare) following recent  
7  
8 378 guidelines on assessment of conduit <sup>64,74</sup> and resistance <sup>65</sup> vessel function. Conduit artery structure will be  
9 379 determined in the common carotid artery (CCA) and brachial artery (BA) with B-mode echoes using a 10  
10  
11 380 MHz multifrequency linear assay ultrasound probe. Measures of CCA and BA structure will be reported as  
12 381 intima media thickness (IMT) (mm), lumen diameter (mm), and wall-to-lumen ratio. The B-mode image will  
13  
14 382 be optimized by changing depth and resolution, and will be kept constant between study visits.

15 383 To assess BA and resistance vessel function, endothelial dependent flow-mediated dilation (FMD) and  
16  
17 384 reactive hyperemia will be determined by cuff occlusion followed by re-perfusion <sup>22</sup>. First, participants will  
18  
19 385 have their baseline BA diameter measured for a period of 30 s. Then, a cuff placed distally on the forearm  
20 386 (i.e. distal to the ultrasound probe) will be inflated for 5 min up to a pressure that exceeds systolic BP by >50  
21  
22 387 mmHg. After 5 min, the cuff will be deflated and post-deflation diameter and blood velocity will be  
23 388 continuously recorded for 3 min <sup>64</sup>. For determination of FMD, both absolute (mm) and relative (%) change  
24  
25 389 in diameter from baseline to post-deflation will be calculated. Given the importance of shear stress as the  
26  
27 390 stimulus for the FMD response <sup>75</sup>, continuous and simultaneous measurement of pulse-wave velocity  
28 391 (Doppler) and diameter (B-mode) using duplex ultrasound will be performed. This allows for an estimation  
29  
30 392 of the shear stress stimuli through the calculation of shear rate, which then can be used to normalize the  
31 393 FMD response <sup>76</sup>. Because the error of the insonation estimation increases exponentially with angles >60° <sup>77</sup>,  
32  
33 394 an insonation angle of ≤60° will be used, with the sample volume adjusted to cover the total width of the  
34 395 vessel.

36 396 Resistance vessel function will be determined by the magnitude of the reactive hyperemic response to cuff-  
37 397 induced ischemia. Several measures obtained from the reactive hyperemic response will be reported,  
38 398 including absolute blood flow (calculated based on the diameter derived cross sectional area and blood  
39  
40 399 velocity) and velocity, peak change in blood flow, and blood flow area under the curve (AUC) across the  
41  
42 400 post-deflation time period.

45 401 Although related, the measure of reactive hyperemia mirrors the magnitude of downstream resistance artery  
46  
47 402 dilation, whereas FMD represent conduit artery dilation <sup>65</sup>.

49 403 To ensure that the same part of the CCA and BA will be insonated across study visits, anatomical landmarks  
50  
51 404 will be identified and recorded together with a photo of the insonation sites. All insonation settings  
52 405 (including sample volume, insonation angle, and recording time) and occlusion procedure (including cuff-  
53  
54 406 position, pressure and duration) will be held consistent within participants across study visits. For  
55 407 standardization, the same investigator will perform all measurements and all analyses (blinded to the identity  
56  
57 408 of the data).

59 409 *Metabolic and inflammatory profile*  
60



1  
2  
3  
4  
5  
6  
7  
8  
9  
10  
11  
12  
13  
14  
15  
16  
17  
18  
19  
20  
21  
22  
23  
24  
25  
26  
27  
28  
29  
30  
31  
32  
33  
34  
35  
36  
37  
38  
39  
40  
41  
42  
43  
44  
45  
46  
47  
48  
49  
50  
51  
52  
53  
54  
55  
56  
57  
58  
59  
60

410 The metabolic and inflammatory profile will be assessed via measures of glycemic control (fasting glucose,  
411 long-term blood glucose (HbA1c, glycosylated hemoglobin), homeostatic model assessment of insulin  
412 resistance (HOMA-IR)), lipid profile (HDL-c, LDL-c, total cholesterol and triglycerides (TG)), pro-  
413 inflammatory (C-reactive protein (CRP), interleukin (IL) 6, tumor necrosis factor-alpha), anti-inflammatory  
414 (IL-10, IL1RA)), prothrombotic (PAI-1), markers of NAFLD (hepatic enzymes (alanine-aminotransferase  
415 (ALT) and aspartate-aminotransferase (AST)), growth differentiation factor 15 (GDF15) and fibroblast  
416 growth factor 21 (FGF21)).

#### 417 *Cardiorespiratory fitness level*

418 Cardiorespiratory fitness level will be determined through an incremental arm-cranking test to exhaustion,  
419 with peak oxygen consumption ( $VO_{2peak}$ ) as the outcome measure. The placement of the ergometer (Monark  
420 881E, Vansbro, Sverige) will be adjusted such that the participants shoulder joint is aligned with the crank  
421 axis with the elbows slightly bend. Participants will be equipped with a HR monitoring belt (Suunto Ambit3  
422 Run; Suunto, Vantaa, Finland) and a face mask, connected to an online open-circuit metabolic cart. The cart  
423 (JAEGER, Vyntus CPX, Carefusion) will be calibrated to known volumes and gas concentrations according  
424 to manufactural guidelines. After a 1-min warm-up with zero resistance, the test begins with an  
425 individualized starting load (5-90W)<sup>78</sup> with increases in work load (5 or 10W) every minute<sup>79</sup> until  
426 volitional fatigue, defined as an inability to maintain cadence above 55 rounds per minute (rpm)<sup>78</sup>. The  
427 individual starting load and increment size will be chosen based on training history and anticipated physical  
428 capacity, with the aim of reaching exhaustion within 8-12 minutes at a cadence of 60-70 rpm<sup>79,80</sup>. Breath-by-  
429 breath  $VO_2$  and carbon dioxide output ( $VCO_2$ ), and HR will be measured continuously throughout the test.  
430  $VO_{2peak}$  will be reported in both absolute ( $l O_2 \cdot min^{-1}$ ) and relative ( $ml O_2 \cdot kg^{-1} \cdot min^{-1}$ ) terms, and defined as  
431 the highest 30-s average during the test, with the corresponding HR reported as  $HR_{peak}$ . The highest workload  
432 that is achieved for  $\geq 30$ -s will be reported as  $PO_{peak}$ . Participants will be asked to indicate RPE (Borg 6-20  
433 scale) during the last 15-s of each minute. On test cessation, participants will gradually cool-down for 5-min,  
434 while their BP will be measured immediately before and after this recovery period.

#### 435 *Other secondary outcomes*

##### 436 *Shoulder pain*

437 The prevalence and severity of shoulder pain will be assessed using the Danish version<sup>81</sup> of the Wheelchair  
438 Users Shoulder Pain Index (WUSPI)<sup>82</sup>. WUSPI is a valid and reliable measure of shoulder pain in manual  
439 wheelchair users<sup>44</sup> The questionnaire utilizes a series of visual analog scales (VAS) ranging from “no pain”  
440 to “worst pain ever experienced”, and it is a self-reported measure of the prevalence and severity of shoulder  
441 pain during different activities such as dressing, bathing, transfer, wheeling up, sleeping etc.<sup>82</sup>. Some  
442 participants may not perform all of the 15 activities. To account for that, a performance-corrected shoulder

1  
2  
3  
4 443 pain score (PC-WUSPI) will be calculated by dividing the raw total WUSPI score by the number of  
5  
6 444 performed activities, multiplied by 15<sup>83</sup>.

#### 8 445 *Health-related quality of life (HRQOL)*

9  
10 446 HRQOL will be monitored using the Danish translated version of the Short Form-36 (SF-36)<sup>84</sup>, which is a  
11 447 reliable and validated questionnaire to assess HRQOL within both a physical and mental health domain<sup>85</sup>.  
12  
13 448 Certain questions of the SF-36 will be adapted to wheelchair use. Specifically, the questions referring to  
14  
15 449 'walk' and 'stair-climbing' is substituted by the words 'climb' and 'go up', as previously recommended<sup>86</sup>.  
16 450 Construct validity stays acceptable with this modification<sup>86</sup>. Data will be scored using the RAND 36-item  
17  
18 451 Health survey 1.0 method<sup>87</sup>, in which original responses is transformed into a score from 0-100, with 100  
19 452 representing the best possible health. Individual item scores is then averaged within domains to create eight  
20  
21 453 subscales, four representing physical QOL and four representing mental QOL. For reporting of HRQOL, a  
22  
23 454 physical component summary score (PCS) and a mental component summary score (MCS) will be created  
24 455 based on the average of each component subscales<sup>88</sup>.

#### 26 456 *Free-living physical activity*

28  
29 457 To determine the effects of the exercise intervention on short-term (12-weeks follow-up) and long-term (6-  
30 458 months follow-up) habitual physical activity, free-living physical activity levels will be monitored  
31  
32 459 objectively via accelerometry. Participants will be fitted with a triaxial wrist-worn accelerometer (Axivity,  
33 460 AX3, Newcastle, UK) placed on the non-dominant wrist using a standard rubber wristband, as recommended  
34  
35 461<sup>89</sup>. Participants will be asked to wear the accelerometer for the 7 days<sup>90</sup> preceding baseline and follow-up  
36 462 (12-weeks and 6-months) visits. The accelerometer (23 x 32.5 x 7.6 (mm)) will be worn continuously  
37  
38 463 through this period (24 hours a day). To be considered a valid day, at least 80% of data for that 24-hour  
39  
40 464 period is required<sup>90</sup>. The AX3 sensor records accelerations within the dynamic range of  $\pm 8$  g. Physical  
41 465 activity levels are derived by aggregating the raw acceleration (expressed as  $\text{g}^1 \cdot \text{min}^{-1}$ ) using either Euclidian  
42  
43 466 norm minus one (ENMO – expressed in mg), mean average deviation (MAD – expressed in mg), activity  
44 467 index (AI – expressed in mg) or Actigraph Counts (AG – expressed in counts)<sup>91–94</sup>. The most optimal  
45  
46 468 aggregation, time interval or epoch, and data band-pass filtering to reduce noise has not been evaluated  
47  
48 469 thoroughly in any previous study. Thus, the final selection of aggregation method, epoch length and band-  
49 470 pass filtering to be used is determined using the same study conducted to estimate the light, moderate and  
50  
51 471 vigorous intensity thresholds (see below).

52  
53 472 For determination of physical activity ( $\text{min} \cdot \text{day}^{-1}$ ) with different intensities (i.e. light, moderate and vigorous  
54 473 physical activity), individual accelerometer cut-off points will be calculated. Individual calibration of wrist-  
55  
56 474 worn accelerometers is recommended for valid estimates of physical activity level<sup>95</sup>. Previous studies<sup>96,97</sup>  
57  
58 475 have established high internal-validity of wrist-worn accelerometer output when compared with energy  
59  
60

1  
2  
3  
4  
5  
6  
7  
8  
9  
10  
11  
12  
13  
14  
15  
16  
17  
18  
19  
20  
21  
22  
23  
24  
25  
26  
27  
28  
29  
30  
31  
32  
33  
34  
35  
36  
37  
38  
39  
40  
41  
42  
43  
44  
45  
46  
47  
48  
49  
50  
51  
52  
53  
54  
55  
56  
57  
58  
59  
60

expenditure measured at fixed speeds during wheelchair propulsion on a motorized treadmill <sup>96,97</sup>. However, this approach may not have high external validity because physical activities outside the laboratory rarely occurs at fixed intensities. Indeed, SCI individuals perform a multitude of leisure-time physical activities and activities of daily living with varying intensity <sup>98</sup>. Therefore, AX3 sensor output will be individually calibrated based on five different standardized “real-life” mimicking activities, each performed for 6 min. Activities will include a folding clothes task, continuous wheelchair propulsion at three different self-paced tempi, and an intermittent wheelchair propulsion with wheeling and stopping at a self-paced tempo.

#### *Feasibility and acceptability of the exercise intervention*

Satisfaction with the exercise intervention will be evaluated with the Feasibility and Acceptability Questionnaire <sup>99</sup>. In brief, participants will be asked to rate how feasible and acceptable they consider the rowing exercise to be on a Likert scale ranging from 1 (strongly disagree) to 5 (strongly agree). The questionnaire consists of six questions addressing issues such as how fun the exercise was perceived; the difficulty level of the exercise; and whether they received appropriate guidance in how to perform the exercise. A mean score of  $\geq 3.0$  will be used as a criterion to indicate that the intervention is acceptable <sup>99</sup>. Additionally, compliance to the exercise intervention will be recorded and presented as compliance rate (% participation). Compliance is defined as the number of exercise sessions completed out of the total number (36) of sessions.

#### **Statistics**

The between group difference in changes of outcome variables will be examined from baseline to post intervention (12-weeks follow-up) (primary endpoint) and again from post intervention to follow-up 6-months later (secondary endpoint).

Primary and secondary endpoint data are ratio and interval data and will therefore be treated as continuous variables. Between group comparisons on primary and secondary endpoint will be dependent on data distribution. We anticipate data to be approximately normally distributed, however before any analysis are commenced, distribution of the data will be assessed through visual inspection of Q-Q-plots and histograms, complemented by test of deviation from normality (Shapiro Wilk test). Assuming normality, descriptive data will be presented as mean  $\pm$  standard deviation (SD), and a two-way analysis of variance (ANOVA) with repeated measurements will be used to evaluate any significant changes in outcomes between (control and exercise) and within (baseline and follow-up) groups from baseline to immediately after the 12-weeks intervention period. Same procedure will be done for secondary endpoint (factor 1: group (control and exercise), factor 2: time (follow-up at 12-weeks and 6-months)). Interactions between the factors will be included in the model. In case of significant F-values, post-hoc testing will be used for multiple comparisons. Effect size of change scores (Cohen’s d) will be calculated in order to determine the magnitude of difference

1  
2  
3  
4 509 between groups. P-values and 95% confidence intervals will be reported to facilitate interpretation of the  
5  
6 510 results. Statistical significance will be accepted at  $P < 0.05$ .

### 8 511 **Patient and public involvement**

9  
10 512 Neither participants nor public were involved with the conception of the research question, study design, or  
11 513 outcome measures, nor will they be involved with study conduction. The recruitment plan was partially  
12  
13 514 planned based on feedback from the patient population. Each of the participants will receive a written  
14  
15 515 summary of the study results after publication.

### 17 517 **Ethics and dissemination**

19 518 Considerations are made regarding the regulation of arterial BP in the participants<sup>100 101</sup>. BP instability does  
20 519 occur in cervical injured individuals (tetraplegics), who may suffer from pronounced autonomic disturbances  
21 520<sup>100,101</sup>. During the  $VO_{2peak}$  test and exercise sessions, special attention is devoted towards potential symptoms  
22  
23 521 of autonomic dysreflexia (AD)<sup>102</sup> in individuals with  $SCI \geq T6$ . Participants will be asked to empty their  
24  
25 522 bladder before any testing or training is commenced. In case of AD, the exercise is stopped and the pertinent  
26  
27 523 actions are made. Occurrences of post exercise hypotension<sup>101</sup> and orthostatic hypotension<sup>100</sup> are rather  
28  
29 524 uncommon in individuals with thoracic injury (paraplegics). According to the inclusion criteria of the study,  
30  
31 525 only individuals with a sparing of arm function (i.e. excluding individuals with a complete cervical injury  
32 526  $\geq C5$  participants) will be included in the study, presumably reducing the number of included individuals with  
33  
34 527 impaired BP regulation. Nevertheless, in addition to reduced vasoconstrictor drive, the ability to increase  
35 528 cardiac output is limited in individuals with  $SCI \geq T5-T6$  with interrupted cardiac sympathetic innervation,  
36  
37 529 which could affect arterial BP stabilization during conditions in which peripheral vascular resistance is  
38  
39 530 further reduced (i.e. during exercise). Therefore, to identify any participants that may be prone to  
40 531 experiencing post exercise hypotension, brachial artery BP will be monitored immediately after, and again 5  
41 532 min after the first  $VO_{2peak}$  test. In such cases, and assuming the hypotension is well tolerated, the participants  
42  
43 533 will be reminded to drink appropriately during and prior any future training and testing. Further, these  
44  
45 534 participants will have their BP measured every second interval (i.e. every 10<sup>th</sup> min) during the training  
46 535 sessions. If hypotension develops, the training will be interrupted and hypotensive countermeasures  
47  
48 536 (placement in a supine position, or legs up) will be applied. If the hypotension is not tolerated, such as if the  
49  
50 537 participants exhibit signs of nausea, light-headedness, fatigue or presyncopal symptoms in response to either  
51 538 the  $VO_{2peak}$  test or the training, they will be excluded from further participation in the study.

52  
53 539 Another consideration is that individuals with SCI suffer from impaired thermoregulation<sup>103</sup>. Although  
54  
55 540 prolonged (60 min) moderate intensity exercise in warm conditions ( $>31^{\circ}C$ ) have been shown sustainable for  
56  
57 541 some paraplegic and tetraplegic individuals<sup>104</sup>, impaired thermoregulation makes SCI individuals more  
58 542 vulnerable to overheating compared to able-bodied<sup>103</sup>. This is especially the case during conditions of  
59  
60

1  
2  
3  
4 543 increased environmental temperatures and metabolic heat production (such as when exercising in the heat).  
5  
6 544 The degree of thermoregulatory impairment is closely related to the injury level, such that individuals with  
7  
8 545 higher injury (tetraplegics) exhibit higher core temperatures during exercise compared to lower injury  
9 546 individuals (paraplegics) <sup>104</sup>. To diminish the risk for overheating during testing and training, a fan will be  
10  
11 547 available for cooling of the participants and the room temperature and humidity will be continuously  
12 548 monitored to facilitate the conditions for dry and evaporative heat loss. Moreover, the participants will be  
13  
14 549 asked to pay attention to proper hydration before and throughout each training session. However, if the  
15 550 participants demonstrate signs of any adverse response, the exercise session will be terminated immediately  
16  
17 551 and further participation in the study will be reconsidered. Any adverse responses from the intervention will  
18  
19 552 be reported to the regional health research committee. The trial is reported to the Danish Data Protection  
20 553 Agency (J.nr. 2019-899/10-0406), registered at Clinicaltrials.org, and approved by the Committees on Health  
21  
22 554 Research Ethics in The North Denmark Region on 12 December 2019 (Journal-nr. N-20190053). Results  
23 555 will be submitted to scientific journals related to exercise and SCI for publication irrespective of study  
24  
25 556 outcomes.

#### 27 557 **Data statement section**

29 558 All participant data will be stored in a secure web-based database (Redcap) with restricted access and ID  
30  
31 559 code, in accordance with data protection rules. Source documents including date, visit# and participant ID  
32  
33 560 will be scanned and saved as electronic copies. Participant data will be transferred directly or by use of an  
34 561 encrypted USB stick. Each participant will be assigned an unique identification number, which will be the  
35  
36 562 only identifier exported from Redcap upon data analysis. Except for the blood samples, which will be stored  
37 563 until analysis, or no more than 5 years, data will be stored for 5 years after the termination of the trial. After  
38  
39 564 this period, paper material is shredded, data files are erased and the Redcap database is no longer accessible.  
40 565 The principal investigator will have access to all trial data.

#### 43 566 **Acknowledgement**

44 567 The authors would like to thank Dr. Rachel E. Cowan for valuable discussions regarding the study protocol,  
45  
46 568 and Dr. Jan Christian Brønd for assistance with the section related to accelerometer data.

#### 48 569 **Author Contributions**

49  
50 570 RKH and RGL conceptualized the study. RKH, AS, UL, AH and RGL contributed to the study protocol  
51 571 design. RKH drafted the manuscript. RKH, AS, UL, AH and RGL commented and edited the manuscript and  
52  
53 572 approved the final version.

#### 56 574 **Funding**

57  
58 575 This work is supported by Aage and Johanne Louis-Hansens Fond, grant number 20-2B-5947, and by  
59 576 Wolturnus A/S. Aage and Johanne Louis-Hansens Fond and Wolturnus A/S will have no influence on any  
60

1  
2  
3  
4 577 part of the project design, data collection, data analysis, data interpretation or the disclosure of the results.

5  
6 578 Thus, their support is solely economical.  
7

8 579 **Competing interests**

9  
10 580 None declared.  
11 581

12  
13 582 **Patient consent**

14 583 Not required.  
15  
16

17 584 **License statement**

18 585 I, the Submitting Author has the right to grant and does grant on behalf of all authors of the Work (as defined  
19  
20 586 in the below author licence), an exclusive licence and/or a non-exclusive licence for contributions from  
21  
22 587 authors who are: i) UK Crown employees; ii) where BMJ has agreed a CC-BY licence shall apply, and/or iii)  
23 588 in accordance with the terms applicable for US Federal Government officers or employees acting as part of  
24  
25 589 their official duties; on a worldwide, perpetual, irrevocable, royalty-free basis to BMJ Publishing Group Ltd  
26 590 (“BMJ”) its licensees and where the relevant Journal is co-owned by BMJ to the co-owners of the Journal, to  
27  
28 591 publish the Work in BMJ Open and any other BMJ products and to exploit all rights, as set out in  
29 592 our licence.  
30

31  
32 593 **Figure 1.** Study overview. PA = physical activity; INT = intervention; RPE = rating of perceived exertion;  
33 594 CON = control.  
34  
35 595  
36  
37  
38 596  
39  
40 597  
41  
42 598  
43  
44 599  
45  
46  
47 600  
48  
49 601  
50  
51 602  
52  
53 603  
54  
55 604  
56  
57  
58 605  
59  
60

1  
2  
3  
4 606 **REFERENCES**  
56  
7 607

- 8
- 
- 9 608 1. LaPorte, R.
- et al.*
- The Spectrum of Physical Activity, Cardiovascular Disease and Health: An
- 
- 10 609 Epidemiologic Perspective.
- Am J Epidemiol.*
- 120**
- , 507–517 (1984).
- 
- 11
- 
- 12 610 2. Myers, J., Lee, M. & Kiratli, J. Cardiovascular disease in spinal cord injury: An overview of
- 
- 13 611 prevalence, risk, evaluation, and management.
- Am. J. Phys. Med. Rehabil.*
- 86**
- , 142–152 (2007).
- 
- 14 612 3. Nash, M. & Cowan, R. Cardiovascular disease, SCI and exercise: unique risks and focused
- 
- 15 613 countermeasures.
- Disabil. Rehabil.*
- 32**
- , 2228–2236 (2010).
- 
- 16
- 
- 17 614 4. Garshick, E.
- et al.*
- A prospective assessment of mortality in chronic spinal cord injury.
- Spinal Cord*
- 
- 18 615
- 43**
- , 408–416 (2005).
- 
- 19
- 
- 20 616 5. Buchholz, A. C.
- et al.*
- Greater daily leisure time physical activity is associated with lower chronic
- 
- 21 617 disease risk in adults with spinal cord injury.
- Appl. Physiol. Nutr. Metab.*
- 34**
- , 640–647 (2009).
- 
- 22
- 
- 23 618 6. Gorgey, A., Dolbow, D., Dolbow, J., Khalil, R. & Gater, D. Effects of spinal cord injury on body
- 
- 24 619 composition and metabolic profile – Part I.
- J. Spinal Cord Med.*
- 37**
- , 693–702 (2014).
- 
- 25
- 
- 26 620 7. Kehn, M. & Kroll, T. Staying physically active after spinal cord injury: A qualitative exploration of
- 
- 27 621 barriers and facilitators to exercise participation.
- BMC Public Health*
- 9**
- , 1–11 (2009).
- 
- 28
- 
- 29 622 8. Rimmer, J. H., Riley, B., Wang, E., Rauworth, A. & Jurkowski, J. Physical activity participation
- 
- 30 623 among persons with disabilities: Barriers and facilitators.
- Am. J. Prev. Med.*
- 26**
- , 419–425 (2004).
- 
- 31
- 
- 32 624 9. Hansen, R. K., Larsen, R. G., Læssøe, U., Samani, A. & Cowan, R. E. Perceived Physical Activity
- 
- 33 625 Barriers in Danish Manual Wheelchair Users.
- Submitt. Manuscr.*
- (2020).
- 
- 34
- 
- 35 626 10. Cowan, R. E., Nash, M. S. & Anderson, K. D. Exercise participation barrier prevalence and
- 
- 36 627 association with exercise participation status in individuals with spinal cord injury. 27–32 (2013)
- 
- 37 628 doi:10.1038/sc.2012.53.
- 
- 38
- 
- 39 629 11. Rimmer, J. H., Rubin, S. S. & Braddock, D. Barriers to exercise in African American women with
- 
- 40 630 physical disabilities.
- Arch. Phys. Med. Rehabil.*
- 81**
- , 182–188 (2000).
- 
- 41
- 
- 42 631 12. Rimmer, J. H., Wang, E. & Smith, D. Barriers associated with exercise and community access for
- 
- 43 632 individuals with stroke.
- J. Rehabil. Res. Dev.*
- 45**
- , 315–322 (2008).
- 
- 44
- 
- 45 633 13. Van Der Scheer, J. W.
- et al.*
- Effects of exercise on fitness and health of adults with spinal cord injury:
- 
- 46 634 A systematic review.
- Neurology*
- 89**
- , 736–745 (2017).
- 
- 47
- 
- 48 635 14. El-Sayed, M. S. & Younesian, A. Lipid profiles are influenced by arm cranking exercise and training
- 
- 49 636 in individuals with spinal cord injury.
- Spinal Cord*
- 43**
- , 299–305 (2005).
- 
- 49
- 
- 50 637 15. Nightingale, T. E., Walhin, J. P., Thompson, D. & Bilzon, J. L. J. Impact of Exercise on
- 
- 51 638 Cardiometabolic Component Risks in Spinal Cord-injured Humans.
- Med. Sci. Sports Exerc.*
- 49**
- ,
- 
- 52 639 2469–2477 (2017).
- 
- 53
- 
- 54 640 16. Kim, D. Il, Lee, H., Lee, B. S., Kim, J. & Jeon, J. Y. Effects of a 6-Week Indoor Hand-Bike Exercise
- 
- 55 641 Program on Health and Fitness Levels in People With Spinal Cord Injury: A Randomized Controlled
- 
- 56 642 Trial Study.
- Arch. Phys. Med. Rehabil.*
- 96**
- , 2033–2040 (2015).
- 
- 57
- 
- 58 643 17. Totosy de Zepetnek, J. O., Pelletier, C. A., Hicks, A. L. & MacDonald, M. J. Following the Physical
- 
- 59 644 Activity Guidelines for Adults With Spinal Cord Injury for 16 Weeks Does Not Improve Vascular
- 
- 60 645 Health: A Randomized Controlled Trial.
- Arch. Phys. Med. Rehabil.*
- 96**
- , 1566–1575 (2015).

- 1  
2  
3  
4 646 18. Wilt, T. J. *et al.* Carbohydrate and lipid disorders and relevant considerations in persons with spinal  
5 647 cord injury (Structured abstract). *Database Abstr. Rev. Eff.* 171 (2008).  
6  
7 648 19. Nightingale, T. E., Metcalfe, R. S., Vollaard, N. B. & Bilzon, J. L. Exercise Guidelines to Promote  
8 649 Cardiometabolic Health in Spinal Cord Injured Humans: Time to Raise the Intensity? *Arch. Phys.*  
9 650 *Med. Rehabil.* **98**, 1693–1704 (2017).  
10  
11 651 20. Green, D. J., Driscoll, G. O., Joyner, M. J. & Cable, N. T. Exercise and cardiovascular risk reduction :  
12 652 Time to update the rationale for exercise ? Exercise and cardiovascular risk reduction : Time to update  
13 653 the rationale for exercise ? 766–768 (2013) doi:10.1152/jappphysiol.01028.2007.  
14  
15 654 21. Gielen, S., Schuler, G. & Hambrecht, M. Exercise Training in Coronary Artery Disease and Coronary  
16 655 Vasomotion. *Circulation* **103**, 1–6 (2001).  
17  
18 656 22. Celermajer, D. *et al.* Non-invasive detection of endothelial dysfunction in children and adults at risk  
19 657 of atherosclerosis Endothelial. *Lancet* **340**, 1111–1115 (1992).  
20  
21 658 23. J., Y. *et al.* Predictive value of brachial flow-mediated dilation for incident cardiovascular events in a  
22 659 population-based study: The multi-ethnic study of atherosclerosis. *Circulation* **120**, 502–509 (2009).  
23  
24 660 24. Lorenz, M. W., Markus, H. S., Bots, M. L., Rosvall, M. & Sitzer, M. Prediction of clinical  
25 661 cardiovascular events with carotid intima-media thickness: A systematic review and meta-analysis.  
26 662 *Circulation* **115**, 459–467 (2007).  
27  
28 663 25. Green, D. J., Hopman, M. T. E., Padilla, J., Laughlin, M. H. & Thijssen, D. H. J. Vascular adaptation  
29 664 to exercise in humans: Role of hemodynamic stimuli. *Physiol. Rev.* **97**, 495–528 (2017).  
30  
31 665 26. de Groot, P. C., Bleeker, M. W., van Kuppevelt, D. H., van der Woude, L. H. & Hopman, M. T.  
32 666 Rapid and Extensive Arterial Adaptations After Spinal Cord Injury. *Arch. Phys. Med. Rehabil.* **87**,  
33 667 688–696 (2006).  
34  
35 668 27. Rowley, N. J. *et al.* Conduit diameter and wall remodeling in elite athletes and spinal cord injury.  
36 669 *Med. Sci. Sports Exerc.* **44**, 844–849 (2012).  
37  
38 670 28. de Groot, P. C. E., Poelkens, F., Kooijman, M. & Hopman, M. T. E. Preserved flow-mediated dilation  
39 671 in the inactive legs of spinal cord-injured individuals. *Am J Physiol Hear. Circ Physiol* **287**, 374–380  
40 672 (2004).  
41  
42 673 29. Huonker, M., Schmid, A., Schmidt-Trucksäb, A., Grathwohl, D. & Keul, J. Size and blood flow of  
43 674 central and peripheral arteries in highly trained able-bodied and disabled athletes. *J. Appl. Physiol.*  
44 675 **95**, 685–691 (2003).  
45  
46 676 30. Ginis, K. A. M. *et al.* The development of evidence-informed physical activity guidelines for adults  
47 677 with spinal cord injury. *Spinal Cord* **49**, 1088–1096 (2011).  
48  
49 678 31. Pelletier, C. A., Totony De Zepetnek, J. O., Macdonald, M. J. & Hicks, A. L. A 16-week randomized  
50 679 controlled trial evaluating the physical activity guidelines for adults with spinal cord injury. *Spinal*  
51 680 *Cord* **53**, 363–367 (2015).  
52  
53 681 32. Martin Ginis, K. A. *et al.* Evidence-based scientific exercise guidelines for adults with spinal cord  
54 682 injury: An update and a new guideline. *Spinal Cord* **56**, 308–321 (2018).  
55  
56 683 33. Cratsenberg, K. A. *et al.* Effectiveness of exercise programs for management of shoulder pain in  
57 684 manual wheelchair users with spinal cord injury. *J. Neurol. Phys. Ther.* **39**, 197–203 (2015).  
58  
59 685 34. Troy, K., Munce, T. & Longworth, J. An exercise trial targeting posterior shoulder strength in manual  
60 686 wheelchair users: Pilot results and lessons learned. *Disabil. Rehabil. Assist. Technol.* **10**, 415–420  
61 687 (2015).  
62



1

2

3

4

5

6

7

8

9

10

11

12

13

14

15

16

17

18

19

20

21

22

23

24

25

26

27

28

29

30

31

32

33

34

35

36

37

38

39

40

41

42

43

44

45

46

47

48

49

50

51

52

53

54

55

56

57

58

59

60

35. Nash, M. S. *et al.* A comparison of 2 circuit exercise training techniques for eliciting matched metabolic responses in persons with paraplegia. *Arch. Phys. Med. Rehabil.* **83**, 201–209 (2002).
36. Curtis, K. *et al.* Effect of a standard exercise protocol on shoulder pain in long-term wheelchair users. *Spinal Cord* **37**, 421–429 (1999).
37. Ballinger, D. A., Rintala, D. H. & Hart, K. A. The relation of shoulder pain and range-of-motion problems to functional limitations, disability, and perceived health of men with spinal cord injury: A multifaceted longitudinal study. *Arch. Phys. Med. Rehabil.* **81**, 1575–1581 (2000).
38. Nichols, P., Norman, P. & Ennis, J. Wheelchair user's shoulder? *Scand J Rehab Med* **11**, 29–32 (1979).
39. Gutierrez, D., Thompson, L., Kemp, B. & Mulroy, S. The relationship of shoulder pain intensity to quality of life, physical activity, and community participation in persons with paraplegia. *J. Spinal Cord Med.* **30**, 251–255 (2007).
40. Nash, M. S., van de Ven, I., van Elk, N. & Johnson, B. M. Effects of Circuit Resistance Training on Fitness Attributes and Upper-Extremity Pain in Middle-Aged Men With Paraplegia. *Arch. Phys. Med. Rehabil.* **88**, 70–75 (2007).
41. Leduc, B. & Lepage, Y. Health-related quality of life after spinal cord injury. *Disabil. Rehabil.* **24**, 196–202 (2002).
42. Lidal, I., Veenstra, M., Hjeltnes, N. & Biering-Sørensen, F. Health-related quality of life in persons with long-standing spinal cord injury. *Spinal Cord* **46**, 710–715 (2008).
43. Ambrosio, F. *et al.* Biomechanics and strength of manual wheelchair users. *J. Spinal Cord Med.* **28**, 407–414 (2005).
44. Curtis, K. *et al.* Reliability and validity of the Wheelchair User's Shoulder Pain Index (WUSPI). *Paraplegia* **33**, 595–601 (1995).
45. Burnham, R. S., May, L., Nelson, E., Steadward, R. & Reid, D. C. Shoulder pain in wheelchair athletes: The role of muscle imbalance. *Am. J. Sports Med.* **21**, 238–242 (1993).
46. Bayley, J., Cochran, T. & Sledge, C. The weight-bearing shoulder. The impingement syndrome in paraplegics. *J. Bone Jt. Surg.* **69**, 676–678 (1987).
47. Collinger, J. L. *et al.* Shoulder Biomechanics During the Push Phase of Wheelchair Propulsion: A Multisite Study of Persons With Paraplegia. *Arch. Phys. Med. Rehabil.* **89**, 667–676 (2008).
48. Mulroy, S. J. *et al.* Strengthening and Optimal Movements for Painful Shoulders (STOMPS) in Chronic Spinal Cord Injury: A Randomized Controlled Trial. *Phys. Ther.* **91**, 305–324 (2011).
49. Secher, N. The Physiology of Rowing. *J. Sports Sci.* **1**, 23–53 (1983).
50. Olenik, L., Laskin, J., Burnham, R., Wheeler, G. & Steadward, R. Efficacy of rowing, backward wheeling and isolated scapular retractor exercise as remedial strength activities for wheelchair users: Application of electromyography. *Paraplegia* **33**, 148–152 (1995).
51. Curtis, K. *et al.* Effect of a standard exercise protocol on shoulder pain in long-term wheelchair users. *Spinal Cord* **37**, 421–429 (1999).
52. Chan, A. *et al.* SPIRIT 2013 Statement : Defining Standard Protocol Items for Clinical Trials. *Ann Intern Med* **158**, 200–207 (2013).
53. Ginis, K. A. M., Phang, S. H., Latimer, A. E. & Arbour-Nicitopoulos, K. P. Reliability and Validity Tests of the Leisure Time Physical Activity Questionnaire for People with Spinal Cord Injury. *Arch.*

1  
2  
3  
4  
5  
6  
7  
8  
9  
10  
11  
12  
13  
14  
15  
16  
17  
18  
19  
20  
21  
22  
23  
24  
25  
26  
27  
28  
29  
30  
31  
32  
33  
34  
35  
36  
37  
38  
39  
40  
41  
42  
43  
44  
45  
46  
47  
48  
49  
50  
51  
52  
53  
54  
55  
56  
57  
58  
59  
60

729 *Phys. Med. Rehabil.* **93**, 677–682 (2012).

54. Lee, R. *et al.* Active vs. passive methods of recruiting ethnic minority women to a health promotion program. *Ann. Behav. Med.* **19**, 378–384 (1997).
55. Ginis, K. a M. & Hicks, A. L. Exercise research issues in the spinal cord injured population. *Exerc. Sport Sci. Rev.* **33**, 49–53 (2005).
56. Astorino, T. A. & Thum, Jacob, S. Interval training elicits higher enjoyment versus moderate exercise in persons with spinal cord injury. *J. Spinal Cord Med.* **41**, 77–84 (2018).
57. Powell, K. E., Paluch, A. E. & Blair, S. N. Physical Activity for Health: What Kind? How Much? How Intense? On Top of What? *Annu. Rev. Public Health* **32**, 349–365 (2011).
58. Borg, G. Perceived exertion as an indicator of somatic stress. *Scand J Rehab Med* 92–98 (1970).
59. Birk, T. J. & Birk, C. A. Use of Ratings of Perceived Exertion for Exercise Prescription. *Sport. Med.* **4**, 1–8 (1987).
60. Goosey-Tolfrey, V. *et al.* Regulating intensity using perceived exertion in spinal cord-injured participants. *Med. Sci. Sports Exerc.* **42**, 608–613 (2010).
61. van der Scheer, J. W., Hutchinson, M. J., Paulson, T., Martin Ginis, K. A. & Goosey-Tolfrey, V. L. Reliability and Validity of Subjective Measures of Aerobic Intensity in Adults With Spinal Cord Injury: A Systematic Review. *PM R* **10**, 194–207 (2018).
62. Lewis, J. E., Nash, M. S., Hamm, L. F., Martins, S. C. & Groah, S. L. The Relationship Between Perceived Exertion and Physiologic Indicators of Stress During Graded Arm Exercise in Persons With Spinal Cord Injuries. *Arch. Phys. Med. Rehabil.* **88**, 1205–1211 (2007).
63. Noble, B. J., Borg, G. A. V., Jacobs, I., Ceci, R. & Kaiser, P. A category-ratio perceived exertion scale: relationship to blood and muscle lactates and heart rate. *Med. Sci. Sport. Exerc.* **16**, 523–528 (1983).
64. Thijssen, D. H. J. *et al.* Expert consensus and evidence-based recommendations for the assessment of flow-mediated dilation in humans. *Eur. Heart J.* **40**, 2534–2547 (2019).
65. Limberg, J. K. *et al.* Assessment of resistance vessel function in human skeletal muscle : guidelines for experimental design , Doppler ultrasound , and pharmacology. (2020) doi:10.1152/ajpheart.00649.2019.
66. Grundy, S. *et al.* Diagnosis and management of the metabolic syndrome AHA / NHLBI Scientific Statement. An American Heart Association/National Heart, Lung, and Blood Institute Scientific Statement. *Circulation* 2735–2752 (2005) doi:10.1161/CIRCULATIONAHA.105.169404.
67. Nash, M. S. *et al.* Identification and Management of Cardiometabolic Risk after Spinal Cord Injury: Clinical Practice Guideline for Health Care Providers. *Top. Spinal Cord Inj. Rehabil.* **24**, 379–423 (2018).
68. McCauley, L. S., Sumrell, R. M. & Gorgey, A. S. Anthropometric Prediction of Visceral Adipose Tissue in Persons With Motor Complete Spinal Cord Injury. *PM R* **10**, 817–825 (2018).
69. Edwards, L. A., Bugaresti, J. M. & Buchholz, A. C. The amount of visceral adipose tissue and the ratio of visceral to subcutaneous adipose tissue is greater in adults with vs. without spinal cord injury. *Faseb J.* **21**, A7–A8 (2007).
70. Sumrell, R. M., Nightingale, T. E., McCauley, L. S. & Gorgey, A. S. Anthropometric cutoffs and associations with visceral adiposity and metabolic biomarkers after spinal cord injury. *PLoS One* **13**, e0203049 (2018).

1  
2  
3  
4  
5  
6  
7  
8  
9  
10  
11  
12  
13  
14  
15  
16  
17  
18  
19  
20  
21  
22  
23  
24  
25  
26  
27  
28  
29  
30  
31  
32  
33  
34  
35  
36  
37  
38  
39  
40  
41  
42  
43  
44  
45  
46  
47  
48  
49  
50  
51  
52  
53  
54  
55  
56  
57  
58  
59  
60

- 771 71. Joyner, M. J. & Green, D. J. Exercise protects the cardiovascular system: Effects beyond traditional  
772 risk factors. *J. Physiol.* **587**, 5551–5558 (2009).
- 773 72. Ahuja, C. S. *et al.* Traumatic spinal cord injury. *Nat. Rev. Dis. Prim.* **3**, 1–21 (2017).
- 774 73. Otsuka, Y., Shima, N., Moritani, T., Okuda, K. & Yabe, K. Orthostatic influence on heart rate and  
775 blood pressure variability in trained persons with tetraplegia. *Eur. J. Appl. Physiol.* **104**, 75–78  
776 (2008).
- 777 74. Thijssen, D. H. J. *et al.* Assessment of flow-mediated dilation in humans: A methodological and  
778 physiological guideline. *Am. J. Physiol. - Hear. Circ. Physiol.* **300**, 2–12 (2011).
- 779 75. Pyke, K. E. & Tschakovsky, M. E. Peak vs. total reactive hyperemia: Which determines the  
780 magnitude of flow-mediated dilation? *J. Appl. Physiol.* **102**, 1510–1519 (2007).
- 781 76. Padilla, J. *et al.* Normalization of flow-mediated dilation to shear stress area under the curve  
782 eliminates the impact of variable hyperemic stimulus. *Cardiovasc. Ultrasound* **6**, 1–10 (2008).
- 783 77. Thrush, A. & Hartshorne, T. *Vascular Ultrasound - How, When and Why.* Churchill Livingstone  
784 (2010). doi:10.1017/CBO9781107415324.004.
- 785 78. Maher, J. L. & Cowan, R. E. Comparison of 1- Versus 3-Minute Stage Duration During Arm  
786 Ergometry in Individuals With Spinal Cord Injury. *Arch. Phys. Med. Rehabil.* **97**, 1895–1900 (2016).
- 787 79. Eerden, S., Dekker, R. & Hettinga, F. J. Maximal and submaximal aerobic tests for wheelchair-  
788 dependent persons with spinal cord injury: a systematic review to summarize and identify useful  
789 applications for clinical rehabilitation. *Disabil. Rehabil.* **40**, 497–521 (2018).
- 790 80. Au, J. S., De Zepetnek, J. O. T. & MacDonald, M. J. Modeling perceived exertion during graded arm  
791 cycling exercise in spinal cord injury. *Med. Sci. Sports Exerc.* **49**, 1190–1196 (2017).
- 792 81. Larsen, C., Hansen, S., Hansen, L., P, B. & B, J.-K. Translation and Cross-Cultural Adaptation of the  
793 Danish Version: Wheelchair Users Shoulder Pain Index (WUSPI). in 1 (2015).
- 794 82. Curtis, K. *et al.* Development of the Wheelchair User's Shoulder Pain Index (WUSPI). *Paraplegia*  
795 **33**, 290–293 (1995).
- 796 83. Curtis, K. A. *et al.* Shoulder pain in wheelchair users with tetraplegia and paraplegia. *Arch. Phys.*  
797 *Med. Rehabil.* **80**, 453–457 (1999).
- 798 84. Bjorner, J. B., Thunedborg, K., Kristensen, T. S., Modvig, J. & Bech, P. The Danish SF-36 Health  
799 Survey: Translation and preliminary validity studies. *J. Clin. Epidemiol.* **51**, 991–999 (1998).
- 800 85. Ware, Jr., J. E. & Sherbourne, C. D. The MOS 36-Item Short-Form Health Survey ( SF-36 ): I .  
801 Conceptual Framework and Item Selection Author. *Med. Care* **30**, 473–483 (1992).
- 802 86. Tate, D. G., Kalpakjian, C. Z. & Forchheimer, M. B. Quality of life issues in individuals with spinal  
803 cord injury. *Arch. Phys. Med. Rehabil.* **83**, 18–25 (2002).
- 804 87. RAND, H. C. 36-Item Short Form Survey (SF-36) Scoring Instructions. [https://www.rand.org/health-  
805 care/surveys\\_tools/mos/36-item-short-form/scoring.html](https://www.rand.org/health-care/surveys_tools/mos/36-item-short-form/scoring.html).
- 806 88. Nightingale, T. E., Rouse, P. C., Walhin, J. P., Thompson, D. & Bilzon, J. L. J. Home-Based Exercise  
807 Enhances Health-Related Quality of Life in Persons With Spinal Cord Injury: A Randomized  
808 Controlled Trial. *Arch. Phys. Med. Rehabil.* **99**, 1998-2006.e1 (2018).
- 809 89. Nightingale, T. E., Rouse, P. C., Thompson, D. & Bilzon, J. L. J. Measurement of Physical Activity  
810 and Energy Expenditure in Wheelchair Users: Methods, Considerations and Future Directions. *Sport.*  
811 *Med. - Open* **3**, (2017).

1  
2  
3  
4  
5  
6  
7  
8  
9  
10  
11  
12  
13  
14  
15  
16  
17  
18  
19  
20  
21  
22  
23  
24  
25  
26  
27  
28  
29  
30  
31  
32  
33  
34  
35  
36  
37  
38  
39  
40  
41  
42  
43  
44  
45  
46  
47  
48  
49  
50  
51  
52  
53  
54  
55  
56  
57  
58  
59  
60

- 812 90. Nightingale, T. E., Walhin, J. P., Turner, J. E., Thompson, D. & Bilzon, J. L. J. The influence of a  
813 home-based exercise intervention on human health indices in individuals with chronic spinal cord  
814 injury (HOMEX-SCI): Study protocol for a randomised controlled trial. *Trials* **17**, 1–12 (2016).
- 815 91. Brønd, J. C., Andersen, L. B. & Arvidsson, D. Generating ActiGraph Counts from Raw Acceleration  
816 Recorded by an Alternative Monitor. *Med. Sci. Sports Exerc.* **49**, 2351–2360 (2017).
- 817 92. van Hees, V. T. *et al.* Separating Movement and Gravity Components in an Acceleration Signal and  
818 Implications for the Assessment of Human Daily Physical Activity. *PLoS One* **8**, 1–10 (2013).
- 819 93. Aittasalo, M. *et al.* Mean amplitude deviation calculated from raw acceleration data: a novel method  
820 for classifying the intensity of adolescents' physical activity irrespective of accelerometer brand.  
821 *BMC Sports Sci. Med. Rehabil.* **7**, 1–7 (2015).
- 822 94. Bai, J. *et al.* An Activity Index for Raw Accelerometry Data and Its Comparison with Other Activity  
823 Metrics. *PLoS One* **11**, 1–14 (2016).
- 824 95. McCracken, L. A. *et al.* Wrist Accelerometry for Physical Activity Measurement in Individuals with  
825 Spinal Cord Injury - A Need for Individually Calibrated Cut-Points. *Arch. Phys. Med. Rehabil.* **99**,  
826 684–689 (2018).
- 827 96. Learmonth, Y. C., Kinnett-Hopkins, D., Rice, I. M., Dysterheft, J. L. & Motl, R. W. Accelerometer  
828 output and its association with energy expenditure during manual wheelchair propulsion. *Spinal Cord*  
829 **54**, 110–114 (2016).
- 830 97. Nightingale, T. E., Walhin, J. P., Thompson, D. & Bilzon, J. L. J. Influence of accelerometer type and  
831 placement on physical activity energy expenditure prediction in manual wheelchair users. *PLoS One*  
832 **10**, 1–15 (2015).
- 833 98. Hetz, S. P., Latimer, A. E. & Martin Ginis, K. A. Activities of daily living performed by individuals  
834 with SCI: Relationships with physical fitness and leisure time physical activity. *Spinal Cord* **47**, 550–  
835 554 (2009).
- 836 99. Visovsky, C. & Corripio, J. Feasibility and Acceptability of a Resistance Exercise Intervention: For  
837 Women Undergoing Chemotherapy for Breast Cancer. *Nurs. Heal.* **3**, 110–119 (2015).
- 838 100. Claydon, V. E. & Krassioukov, A. V. Orthostatic Hypotension and Autonomic Pathways after Spinal  
839 Cord Injury. *J. Neurotrauma* **23**, 1713–1725 (2006).
- 840 101. Claydon, V. E., Hol, A. T., Eng, J. J. & Krassioukov, A. V. Cardiovascular Responses and  
841 Postexercise Hypotension After Arm Cycling Exercise in Subjects With Spinal Cord Injury. *Arch.*  
842 *Phys. Med. Rehabil.* **87**, 1106–1114 (2006).
- 843 102. Phillips, A. A. & Krassioukov, A. V. Contemporary Cardiovascular Concerns after Spinal Cord  
844 Injury: Mechanisms, Maladaptations, and Management. *J. Neurotrauma* **32**, 1927–1942 (2015).
- 845 103. Sawka, M., Latzka, W. & Pandolf, K. Temperature Regulation During Upper Body Exercise: Able  
846 Bodied And Spinal Cord Injured. *Med. Eng. Phys.* **21**, 132–40 (1989).
- 847 104. Price, M. & Campbell, I. Effects of spinal cord lesion level upon thermoregulation during exercise in  
848 the heat. *Med. Sci. Sports Exerc.* **35**, 1100–1107 (2003).

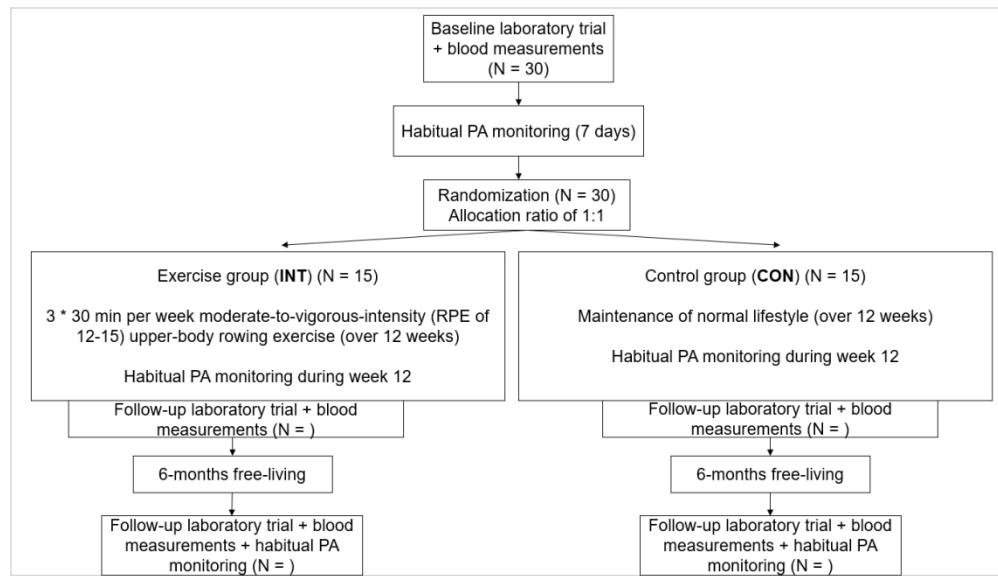

Figure 1. Study overview. PA = physical activity; INT = intervention; RPE = rating of perceived exertion; CON = control.

# Reporting checklist for protocol of a clinical trial.

Based on the SPIRIT guidelines.

## Instructions to authors

Complete this checklist by entering the page numbers from your manuscript where readers will find each of the items listed below.

Your article may not currently address all the items on the checklist. Please modify your text to include the missing information. If you are certain that an item does not apply, please write "n/a" and provide a short explanation.

Upload your completed checklist as an extra file when you submit to a journal.

In your methods section, say that you used the SPIRIT reporting guidelines, and cite them as:

Chan A-W, Tetzlaff JM, Altman DG, Laupacis A, Gøtzsche PC, Krleža-Jerić K, Hróbjartsson A, Mann H, Dickersin K, Berlin J, Doré C, Parulekar W, Summerskill W, Groves T, Schulz K, Sox H, Rockhold FW, Rennie D, Moher D. SPIRIT 2013 Statement: Defining standard protocol items for clinical trials. *Ann Intern Med.* 2013;158(3):200-207

|                                   | Reporting Item                                                                                                                  | Page Number |
|-----------------------------------|---------------------------------------------------------------------------------------------------------------------------------|-------------|
| <b>Administrative information</b> |                                                                                                                                 |             |
| Title                             | <a href="#">#1</a> Descriptive title identifying the study design, population, interventions, and, if applicable, trial acronym | 1,3         |

|    |                     |                     |                                            |                                |
|----|---------------------|---------------------|--------------------------------------------|--------------------------------|
| 1  | Trial registration  | <a href="#">#2a</a> | Trial identifier and registry name. If not | 4,8                            |
| 2  |                     |                     | yet registered, name of intended           |                                |
| 3  |                     |                     | registry                                   |                                |
| 4  |                     |                     |                                            |                                |
| 5  |                     |                     |                                            |                                |
| 6  |                     |                     |                                            |                                |
| 7  |                     |                     |                                            |                                |
| 8  |                     |                     |                                            |                                |
| 9  | Trial registration: | <a href="#">#2b</a> | All items from the World Health            | n/a. The trial has been        |
| 10 |                     |                     | Organization Trial Registration Data       | registered with details        |
| 11 | data set            |                     | Set                                        | provided at Clinicaltrials.gov |
| 12 |                     |                     |                                            |                                |
| 13 |                     |                     |                                            |                                |
| 14 |                     |                     |                                            |                                |
| 15 |                     |                     |                                            |                                |
| 16 | Protocol version    | <a href="#">#3</a>  | Date and version identifier                | 1                              |
| 17 |                     |                     |                                            |                                |
| 18 |                     |                     |                                            |                                |
| 19 | Funding             | <a href="#">#4</a>  | Sources and types of financial,            | 18                             |
| 20 |                     |                     | material, and other support                |                                |
| 21 |                     |                     |                                            |                                |
| 22 |                     |                     |                                            |                                |
| 23 |                     |                     |                                            |                                |
| 24 |                     |                     |                                            |                                |
| 25 | Roles and           | <a href="#">#5a</a> | Names, affiliations, and roles of          | 1,2,18                         |
| 26 |                     |                     | protocol contributors                      |                                |
| 27 | responsibilities:   |                     |                                            |                                |
| 28 |                     |                     |                                            |                                |
| 29 | contributorship     |                     |                                            |                                |
| 30 |                     |                     |                                            |                                |
| 31 |                     |                     |                                            |                                |
| 32 | Roles and           | <a href="#">#5b</a> | Name and contact information for the       | 18                             |
| 33 |                     |                     | trial sponsor                              |                                |
| 34 | responsibilities:   |                     |                                            |                                |
| 35 |                     |                     |                                            |                                |
| 36 | sponsor contact     |                     |                                            |                                |
| 37 |                     |                     |                                            |                                |
| 38 | information         |                     |                                            |                                |
| 39 |                     |                     |                                            |                                |
| 40 |                     |                     |                                            |                                |
| 41 |                     |                     |                                            |                                |
| 42 | Roles and           | <a href="#">#5c</a> | Role of study sponsor and funders, if      | 18                             |
| 43 |                     |                     | any, in study design; collection,          |                                |
| 44 | responsibilities:   |                     | management, analysis, and                  |                                |
| 45 |                     |                     | interpretation of data; writing of the     |                                |
| 46 | sponsor and         |                     | report; and the decision to submit the     |                                |
| 47 |                     |                     | report for publication, including whether  |                                |
| 48 | funder              |                     |                                            |                                |
| 49 |                     |                     |                                            |                                |
| 50 |                     |                     |                                            |                                |
| 51 |                     |                     |                                            |                                |
| 52 |                     |                     |                                            |                                |
| 53 |                     |                     |                                            |                                |
| 54 |                     |                     |                                            |                                |
| 55 |                     |                     |                                            |                                |
| 56 |                     |                     |                                            |                                |
| 57 |                     |                     |                                            |                                |
| 58 |                     |                     |                                            |                                |
| 59 |                     |                     |                                            |                                |
| 60 |                     |                     |                                            |                                |

1 they will have ultimate authority over  
 2  
 3 any of these activities  
 4

5  
 6 Roles and [#5d](#) Composition, roles, and responsibilities n/a. No such committee has  
 7 responsibilities: of the coordinating centre, steering been established.  
 8 committees committee, endpoint adjudication  
 9 committee, data management team,  
 10 and other individuals or groups  
 11 overseeing the trial, if applicable (see  
 12 Item 21a for data monitoring  
 13 committee)  
 14  
 15  
 16  
 17  
 18  
 19  
 20  
 21  
 22  
 23  
 24

## 25 Introduction

26  
 27  
 28 Background and [#6a](#) Description of research question and 6-8  
 29 rationale justification for undertaking the trial,  
 30 including summary of relevant studies  
 31 (published and unpublished) examining  
 32 benefits and harms for each  
 33 intervention  
 34  
 35  
 36  
 37  
 38  
 39  
 40  
 41

42 Background and [#6b](#) Explanation for choice of comparators 6-8  
 43 rationale: choice  
 44 of comparators  
 45  
 46  
 47  
 48  
 49

50 Objectives [#7](#) Specific objectives or hypotheses 8  
 51  
 52

53 Trial design [#8](#) Description of trial design including type 8  
 54 of trial (eg, parallel group, crossover,  
 55 factorial, single group), allocation ratio,  
 56  
 57  
 58  
 59  
 60



and framework (eg, superiority,  
equivalence, non-inferiority,  
exploratory)

## Methods:

### Participants, interventions, and outcomes

|                                 |                      |                                                                                                                                                                                              |             |
|---------------------------------|----------------------|----------------------------------------------------------------------------------------------------------------------------------------------------------------------------------------------|-------------|
| Study setting                   | <a href="#">#9</a>   | Description of study settings (eg, community clinic, academic hospital) and list of countries where data will be collected. Reference to where list of study sites can be obtained           | 9,11        |
| Eligibility criteria            | <a href="#">#10</a>  | Inclusion and exclusion criteria for participants. If applicable, eligibility criteria for study centres and individuals who will perform the interventions (eg, surgeons, psychotherapists) | 8,9         |
| Interventions:<br>description   | <a href="#">#11a</a> | Interventions for each group with sufficient detail to allow replication, including how and when they will be administered                                                                   | 9-11        |
| Interventions:<br>modifications | <a href="#">#11b</a> | Criteria for discontinuing or modifying allocated interventions for a given trial participant (eg, drug dose change in                                                                       | 9-11, 17,18 |

|    |                  |                                                         |       |
|----|------------------|---------------------------------------------------------|-------|
| 1  |                  | response to harms, participant request,                 |       |
| 2  |                  | or improving / worsening disease)                       |       |
| 3  |                  |                                                         |       |
| 4  |                  |                                                         |       |
| 5  |                  |                                                         |       |
| 6  | Interventions:   | <a href="#">#11c</a> Strategies to improve adherence to | 16    |
| 7  |                  |                                                         |       |
| 8  | adherence        | intervention protocols, and any                         |       |
| 9  |                  |                                                         |       |
| 10 |                  | procedures for monitoring adherence                     |       |
| 11 |                  |                                                         |       |
| 12 |                  | (eg, drug tablet return; laboratory tests)              |       |
| 13 |                  |                                                         |       |
| 14 |                  |                                                         |       |
| 15 |                  |                                                         |       |
| 16 | Interventions:   | <a href="#">#11d</a> Relevant concomitant care and      | 9-11  |
| 17 |                  |                                                         |       |
| 18 | concomitant care | interventions that are permitted or                     |       |
| 19 |                  |                                                         |       |
| 20 |                  | prohibited during the trial                             |       |
| 21 |                  |                                                         |       |
| 22 |                  |                                                         |       |
| 23 | Outcomes         | <a href="#">#12</a> Primary, secondary, and other       | 12-17 |
| 24 |                  |                                                         |       |
| 25 |                  | outcomes, including the specific                        |       |
| 26 |                  |                                                         |       |
| 27 |                  | measurement variable (eg, systolic                      |       |
| 28 |                  |                                                         |       |
| 29 |                  | blood pressure), analysis metric (eg,                   |       |
| 30 |                  |                                                         |       |
| 31 |                  | change from baseline, final value, time                 |       |
| 32 |                  |                                                         |       |
| 33 |                  | to event), method of aggregation (eg,                   |       |
| 34 |                  |                                                         |       |
| 35 |                  | median, proportion), and time point for                 |       |
| 36 |                  |                                                         |       |
| 37 |                  | each outcome. Explanation of the                        |       |
| 38 |                  |                                                         |       |
| 39 |                  | clinical relevance of chosen efficacy                   |       |
| 40 |                  |                                                         |       |
| 41 |                  | and harm outcomes is strongly                           |       |
| 42 |                  |                                                         |       |
| 43 |                  | recommended                                             |       |
| 44 |                  |                                                         |       |
| 45 |                  |                                                         |       |
| 46 |                  |                                                         |       |
| 47 |                  |                                                         |       |
| 48 |                  |                                                         |       |
| 49 | Participant      | <a href="#">#13</a> Time schedule of enrolment,         | 11    |
| 50 |                  |                                                         |       |
| 51 | timeline         | interventions (including any run-ins and                |       |
| 52 |                  |                                                         |       |
| 53 |                  | washouts), assessments, and visits for                  |       |
| 54 |                  |                                                         |       |
| 55 |                  | participants. A schematic diagram is                    |       |
| 56 |                  |                                                         |       |
| 57 |                  | highly recommended (see Figure)                         |       |
| 58 |                  |                                                         |       |
| 59 |                  |                                                         |       |
| 60 |                  |                                                         |       |

|    |                           |                      |                                         |   |
|----|---------------------------|----------------------|-----------------------------------------|---|
| 1  | Sample size               | <a href="#">#14</a>  | Estimated number of participants        | 9 |
| 2  |                           |                      |                                         |   |
| 3  |                           |                      | needed to achieve study objectives and  |   |
| 4  |                           |                      | how it was determined, including        |   |
| 5  |                           |                      | clinical and statistical assumptions    |   |
| 6  |                           |                      | supporting any sample size calculations |   |
| 7  |                           |                      |                                         |   |
| 8  |                           |                      |                                         |   |
| 9  |                           |                      |                                         |   |
| 10 |                           |                      |                                         |   |
| 11 |                           |                      |                                         |   |
| 12 |                           |                      |                                         |   |
| 13 | Recruitment               | <a href="#">#15</a>  | Strategies for achieving adequate       | 9 |
| 14 |                           |                      | participant enrolment to reach target   |   |
| 15 |                           |                      | sample size                             |   |
| 16 |                           |                      |                                         |   |
| 17 |                           |                      |                                         |   |
| 18 |                           |                      |                                         |   |
| 19 |                           |                      |                                         |   |
| 20 |                           |                      |                                         |   |
| 21 | <b>Methods:</b>           |                      |                                         |   |
| 22 |                           |                      |                                         |   |
| 23 | <b>Assignment of</b>      |                      |                                         |   |
| 24 |                           |                      |                                         |   |
| 25 | <b>interventions (for</b> |                      |                                         |   |
| 26 |                           |                      |                                         |   |
| 27 | <b>controlled trials)</b> |                      |                                         |   |
| 28 |                           |                      |                                         |   |
| 29 |                           |                      |                                         |   |
| 30 |                           |                      |                                         |   |
| 31 | Allocation:               | <a href="#">#16a</a> | Method of generating the allocation     | 8 |
| 32 |                           |                      | sequence (eg, computer-generated        |   |
| 33 | sequence                  |                      | random numbers), and list of any        |   |
| 34 |                           |                      | factors for stratification. To reduce   |   |
| 35 | generation                |                      | predictability of a random sequence,    |   |
| 36 |                           |                      | details of any planned restriction (eg, |   |
| 37 |                           |                      | blocking) should be provided in a       |   |
| 38 |                           |                      | separate document that is unavailable   |   |
| 39 |                           |                      | to those who enrol participants or      |   |
| 40 |                           |                      | assign interventions                    |   |
| 41 |                           |                      |                                         |   |
| 42 |                           |                      |                                         |   |
| 43 |                           |                      |                                         |   |
| 44 |                           |                      |                                         |   |
| 45 |                           |                      |                                         |   |
| 46 |                           |                      |                                         |   |
| 47 |                           |                      |                                         |   |
| 48 |                           |                      |                                         |   |
| 49 |                           |                      |                                         |   |
| 50 |                           |                      |                                         |   |
| 51 |                           |                      |                                         |   |
| 52 |                           |                      |                                         |   |
| 53 |                           |                      |                                         |   |
| 54 |                           |                      |                                         |   |
| 55 |                           |                      |                                         |   |
| 56 |                           |                      |                                         |   |
| 57 |                           |                      |                                         |   |
| 58 |                           |                      |                                         |   |
| 59 |                           |                      |                                         |   |
| 60 |                           |                      |                                         |   |

|    |                      |                      |                                             |                                 |
|----|----------------------|----------------------|---------------------------------------------|---------------------------------|
| 1  | Allocation           | <a href="#">#16b</a> | Mechanism of implementing the               | 8                               |
| 2  |                      |                      |                                             |                                 |
| 3  | concealment          |                      | allocation sequence (eg, central            |                                 |
| 4  |                      |                      | telephone; sequentially numbered,           |                                 |
| 5  | mechanism            |                      | opaque, sealed envelopes), describing       |                                 |
| 6  |                      |                      | any steps to conceal the sequence until     |                                 |
| 7  |                      |                      | interventions are assigned                  |                                 |
| 8  |                      |                      |                                             |                                 |
| 9  |                      |                      |                                             |                                 |
| 10 |                      |                      |                                             |                                 |
| 11 |                      |                      |                                             |                                 |
| 12 |                      |                      |                                             |                                 |
| 13 |                      |                      |                                             |                                 |
| 14 |                      |                      |                                             |                                 |
| 15 | Allocation:          | <a href="#">#16c</a> | Who will generate the allocation            | 8-9                             |
| 16 |                      |                      |                                             |                                 |
| 17 | implementation       |                      | sequence, who will enrol participants,      |                                 |
| 18 |                      |                      | and who will assign participants to         |                                 |
| 19 |                      |                      | interventions                               |                                 |
| 20 |                      |                      |                                             |                                 |
| 21 |                      |                      |                                             |                                 |
| 22 |                      |                      |                                             |                                 |
| 23 |                      |                      |                                             |                                 |
| 24 |                      |                      |                                             |                                 |
| 25 | Blinding (masking)   | <a href="#">#17a</a> | Who will be blinded after assignment to     | 13                              |
| 26 |                      |                      | interventions (eg, trial participants, care |                                 |
| 27 |                      |                      | providers, outcome assessors, data          |                                 |
| 28 |                      |                      | analysts), and how                          |                                 |
| 29 |                      |                      |                                             |                                 |
| 30 |                      |                      |                                             |                                 |
| 31 |                      |                      |                                             |                                 |
| 32 |                      |                      |                                             |                                 |
| 33 |                      |                      |                                             |                                 |
| 34 |                      |                      |                                             |                                 |
| 35 | Blinding             | <a href="#">#17b</a> | If blinded, circumstances under which       | n/a. Participants allocated to  |
| 36 |                      |                      |                                             |                                 |
| 37 | (masking):           |                      | unblinding is permissible, and              | the exercise and control        |
| 38 |                      |                      | procedure for revealing a participant's     | group cannot be blinded to      |
| 39 | emergency            |                      | allocated intervention during the trial     | the PI, because PI is           |
| 40 |                      |                      |                                             | responsible for conducting      |
| 41 | unblinding           |                      |                                             | the study. Parts of data        |
| 42 |                      |                      |                                             | analysis will be blinded to the |
| 43 |                      |                      |                                             | PI.                             |
| 44 |                      |                      |                                             |                                 |
| 45 |                      |                      |                                             |                                 |
| 46 |                      |                      |                                             |                                 |
| 47 |                      |                      |                                             |                                 |
| 48 |                      |                      |                                             |                                 |
| 49 |                      |                      |                                             |                                 |
| 50 |                      |                      |                                             |                                 |
| 51 |                      |                      |                                             |                                 |
| 52 |                      |                      |                                             |                                 |
| 53 |                      |                      |                                             |                                 |
| 54 | <b>Methods: Data</b> |                      |                                             |                                 |
| 55 |                      |                      |                                             |                                 |
| 56 | <b>collection,</b>   |                      |                                             |                                 |
| 57 |                      |                      |                                             |                                 |
| 58 |                      |                      |                                             |                                 |
| 59 |                      |                      |                                             |                                 |
| 60 |                      |                      |                                             |                                 |

**management, and****analysis**

|    |                 |                      |                                               |
|----|-----------------|----------------------|-----------------------------------------------|
| 1  |                 |                      |                                               |
| 2  |                 |                      |                                               |
| 3  |                 |                      |                                               |
| 4  |                 |                      |                                               |
| 5  |                 |                      |                                               |
| 6  | Data collection | <a href="#">#18a</a> | Plans for assessment and collection of 10-16  |
| 7  |                 |                      |                                               |
| 8  | plan            |                      | outcome, baseline, and other trial data,      |
| 9  |                 |                      |                                               |
| 10 |                 |                      | including any related processes to            |
| 11 |                 |                      |                                               |
| 12 |                 |                      | promote data quality (eg, duplicate           |
| 13 |                 |                      |                                               |
| 14 |                 |                      | measurements, training of assessors)          |
| 15 |                 |                      |                                               |
| 16 |                 |                      | and a description of study instruments        |
| 17 |                 |                      |                                               |
| 18 |                 |                      | (eg, questionnaires, laboratory tests)        |
| 19 |                 |                      |                                               |
| 20 |                 |                      | along with their reliability and validity, if |
| 21 |                 |                      |                                               |
| 22 |                 |                      | known. Reference to where data                |
| 23 |                 |                      |                                               |
| 24 |                 |                      | collection forms can be found, if not in      |
| 25 |                 |                      |                                               |
| 26 |                 |                      | the protocol                                  |
| 27 |                 |                      |                                               |
| 28 |                 |                      |                                               |
| 29 |                 |                      |                                               |
| 30 |                 |                      |                                               |
| 31 | Data collection | <a href="#">#18b</a> | Plans to promote participant retention 16     |
| 32 |                 |                      |                                               |
| 33 | plan: retention |                      | and complete follow-up, including list of     |
| 34 |                 |                      |                                               |
| 35 |                 |                      | any outcome data to be collected for          |
| 36 |                 |                      |                                               |
| 37 |                 |                      | participants who discontinue or deviate       |
| 38 |                 |                      |                                               |
| 39 |                 |                      | from intervention protocols                   |
| 40 |                 |                      |                                               |
| 41 |                 |                      |                                               |
| 42 |                 |                      |                                               |
| 43 | Data management | <a href="#">#19</a>  | Plans for data entry, coding, security, 18    |
| 44 |                 |                      |                                               |
| 45 |                 |                      | and storage, including any related            |
| 46 |                 |                      |                                               |
| 47 |                 |                      | processes to promote data quality (eg,        |
| 48 |                 |                      |                                               |
| 49 |                 |                      | double data entry; range checks for           |
| 50 |                 |                      |                                               |
| 51 |                 |                      | data values). Reference to where              |
| 52 |                 |                      |                                               |
| 53 |                 |                      | details of data management procedures         |
| 54 |                 |                      |                                               |
| 55 |                 |                      | can be found, if not in the protocol          |
| 56 |                 |                      |                                               |
| 57 |                 |                      |                                               |
| 58 |                 |                      |                                               |
| 59 |                 |                      |                                               |
| 60 |                 |                      |                                               |

|    |                      |                      |                                            |     |
|----|----------------------|----------------------|--------------------------------------------|-----|
| 1  | Statistics:          | <a href="#">#20a</a> | Statistical methods for analysing          | 16  |
| 2  |                      |                      |                                            |     |
| 3  | outcomes             |                      | primary and secondary outcomes.            |     |
| 4  |                      |                      |                                            |     |
| 5  |                      |                      | Reference to where other details of the    |     |
| 6  |                      |                      | statistical analysis plan can be found, if |     |
| 7  |                      |                      |                                            |     |
| 8  |                      |                      | not in the protocol                        |     |
| 9  |                      |                      |                                            |     |
| 10 |                      |                      |                                            |     |
| 11 |                      |                      |                                            |     |
| 12 |                      |                      |                                            |     |
| 13 | Statistics:          | <a href="#">#20b</a> | Methods for any additional analyses        | 16  |
| 14 |                      |                      |                                            |     |
| 15 | additional           |                      | (eg, subgroup and adjusted analyses)       |     |
| 16 |                      |                      |                                            |     |
| 17 | analyses             |                      |                                            |     |
| 18 |                      |                      |                                            |     |
| 19 |                      |                      |                                            |     |
| 20 |                      |                      |                                            |     |
| 21 | Statistics: analysis | <a href="#">#20c</a> | Definition of analysis population relating | 16  |
| 22 |                      |                      |                                            |     |
| 23 | population and       |                      | to protocol non-adherence (eg, as          |     |
| 24 |                      |                      |                                            |     |
| 25 | missing data         |                      | randomised analysis), and any              |     |
| 26 |                      |                      |                                            |     |
| 27 |                      |                      | statistical methods to handle missing      |     |
| 28 |                      |                      |                                            |     |
| 29 |                      |                      | data (eg, multiple imputation)             |     |
| 30 |                      |                      |                                            |     |
| 31 |                      |                      |                                            |     |
| 32 |                      |                      |                                            |     |
| 33 | <b>Methods:</b>      |                      |                                            |     |
| 34 |                      |                      |                                            |     |
| 35 | <b>Monitoring</b>    |                      |                                            |     |
| 36 |                      |                      |                                            |     |
| 37 |                      |                      |                                            |     |
| 38 | Data monitoring:     | <a href="#">#21a</a> | Composition of data monitoring             | n/a |
| 39 |                      |                      |                                            |     |
| 40 | formal committee     |                      | committee (DMC); summary of its role       |     |
| 41 |                      |                      |                                            |     |
| 42 |                      |                      | and reporting structure; statement of      |     |
| 43 |                      |                      |                                            |     |
| 44 |                      |                      | whether it is independent from the         |     |
| 45 |                      |                      |                                            |     |
| 46 |                      |                      | sponsor and competing interests; and       |     |
| 47 |                      |                      |                                            |     |
| 48 |                      |                      | reference to where further details about   |     |
| 49 |                      |                      |                                            |     |
| 50 |                      |                      | its charter can be found, if not in the    |     |
| 51 |                      |                      |                                            |     |
| 52 |                      |                      | protocol. Alternatively, an explanation    |     |
| 53 |                      |                      |                                            |     |
| 54 |                      |                      | of why a DMC is not needed                 |     |
| 55 |                      |                      |                                            |     |
| 56 |                      |                      |                                            |     |
| 57 |                      |                      |                                            |     |
| 58 |                      |                      |                                            |     |
| 59 |                      |                      |                                            |     |
| 60 |                      |                      |                                            |     |

|    |                      |                      |                                           |       |
|----|----------------------|----------------------|-------------------------------------------|-------|
| 1  | Data monitoring:     | <a href="#">#21b</a> | Description of any interim analyses and   | n/a   |
| 2  |                      |                      |                                           |       |
| 3  | interim analysis     |                      | stopping guidelines, including who will   |       |
| 4  |                      |                      |                                           |       |
| 5  |                      |                      | have access to these interim results      |       |
| 6  |                      |                      |                                           |       |
| 7  |                      |                      | and make the final decision to            |       |
| 8  |                      |                      |                                           |       |
| 9  |                      |                      | terminate the trial                       |       |
| 10 |                      |                      |                                           |       |
| 11 |                      |                      |                                           |       |
| 12 |                      |                      |                                           |       |
| 13 | Harms                | <a href="#">#22</a>  | Plans for collecting, assessing,          | 17-18 |
| 14 |                      |                      |                                           |       |
| 15 |                      |                      | reporting, and managing solicited and     |       |
| 16 |                      |                      |                                           |       |
| 17 |                      |                      | spontaneously reported adverse events     |       |
| 18 |                      |                      |                                           |       |
| 19 |                      |                      | and other unintended effects of trial     |       |
| 20 |                      |                      |                                           |       |
| 21 |                      |                      | interventions or trial conduct            |       |
| 22 |                      |                      |                                           |       |
| 23 |                      |                      |                                           |       |
| 24 |                      |                      |                                           |       |
| 25 | Auditing             | <a href="#">#23</a>  | Frequency and procedures for auditing     | 17-18 |
| 26 |                      |                      |                                           |       |
| 27 |                      |                      | trial conduct, if any, and whether the    |       |
| 28 |                      |                      |                                           |       |
| 29 |                      |                      | process will be independent from          |       |
| 30 |                      |                      |                                           |       |
| 31 |                      |                      | investigators and the sponsor             |       |
| 32 |                      |                      |                                           |       |
| 33 |                      |                      |                                           |       |
| 34 |                      |                      |                                           |       |
| 35 | <b>Ethics and</b>    |                      |                                           |       |
| 36 |                      |                      |                                           |       |
| 37 | <b>dissemination</b> |                      |                                           |       |
| 38 |                      |                      |                                           |       |
| 39 |                      |                      |                                           |       |
| 40 |                      |                      |                                           |       |
| 41 | Research ethics      | <a href="#">#24</a>  | Plans for seeking research ethics         | 18    |
| 42 |                      |                      |                                           |       |
| 43 | approval             |                      | committee / institutional review board    |       |
| 44 |                      |                      |                                           |       |
| 45 |                      |                      | (REC / IRB) approval                      |       |
| 46 |                      |                      |                                           |       |
| 47 |                      |                      |                                           |       |
| 48 | Protocol             | <a href="#">#25</a>  | Plans for communicating important         | 18    |
| 49 |                      |                      |                                           |       |
| 50 | amendments           |                      | protocol modifications (eg, changes to    |       |
| 51 |                      |                      |                                           |       |
| 52 |                      |                      | eligibility criteria, outcomes, analyses) |       |
| 53 |                      |                      |                                           |       |
| 54 |                      |                      | to relevant parties (eg, investigators,   |       |
| 55 |                      |                      |                                           |       |
| 56 |                      |                      |                                           |       |
| 57 |                      |                      |                                           |       |
| 58 |                      |                      |                                           |       |
| 59 |                      |                      |                                           |       |
| 60 |                      |                      |                                           |       |

|    |                    |                                                             |     |
|----|--------------------|-------------------------------------------------------------|-----|
| 1  |                    | REC / IRBs, trial participants, trial                       |     |
| 2  |                    | registries, journals, regulators)                           |     |
| 3  |                    |                                                             |     |
| 4  |                    |                                                             |     |
| 5  |                    |                                                             |     |
| 6  | Consent or assent  | <a href="#">#26a</a> Who will obtain informed consent or    | 8   |
| 7  |                    | assent from potential trial participants                    |     |
| 8  |                    | or authorised surrogates, and how (see                      |     |
| 9  |                    | Item 32)                                                    |     |
| 10 |                    |                                                             |     |
| 11 |                    |                                                             |     |
| 12 |                    |                                                             |     |
| 13 |                    |                                                             |     |
| 14 |                    |                                                             |     |
| 15 | Consent or         | <a href="#">#26b</a> Additional consent provisions for      | n/a |
| 16 |                    | collection and use of participant data                      |     |
| 17 | assent: ancillary  | and biological specimens in ancillary                       |     |
| 18 |                    | studies, if applicable                                      |     |
| 19 | studies            |                                                             |     |
| 20 |                    |                                                             |     |
| 21 |                    |                                                             |     |
| 22 |                    |                                                             |     |
| 23 |                    |                                                             |     |
| 24 |                    |                                                             |     |
| 25 | Confidentiality    | <a href="#">#27</a> How personal information about          | 18  |
| 26 |                    | potential and enrolled participants will                    |     |
| 27 |                    | be collected, shared, and maintained in                     |     |
| 28 |                    | order to protect confidentiality before,                    |     |
| 29 |                    | during, and after the trial                                 |     |
| 30 |                    |                                                             |     |
| 31 |                    |                                                             |     |
| 32 |                    |                                                             |     |
| 33 |                    |                                                             |     |
| 34 |                    |                                                             |     |
| 35 |                    |                                                             |     |
| 36 |                    |                                                             |     |
| 37 | Declaration of     | <a href="#">#28</a> Financial and other competing interests | 18  |
| 38 |                    | for principal investigators for the overall                 |     |
| 39 | interests          | trial and each study site                                   |     |
| 40 |                    |                                                             |     |
| 41 |                    |                                                             |     |
| 42 |                    |                                                             |     |
| 43 |                    |                                                             |     |
| 44 |                    |                                                             |     |
| 45 | Data access        | <a href="#">#29</a> Statement of who will have access to    | 18  |
| 46 |                    | the final trial dataset, and disclosure of                  |     |
| 47 |                    | contractual agreements that limit such                      |     |
| 48 |                    | access for investigators                                    |     |
| 49 |                    |                                                             |     |
| 50 |                    |                                                             |     |
| 51 |                    |                                                             |     |
| 52 |                    |                                                             |     |
| 53 |                    |                                                             |     |
| 54 |                    |                                                             |     |
| 55 | Ancillary and post | <a href="#">#30</a> Provisions, if any, for ancillary and   | n/a |
| 56 |                    | post-trial care, and for compensation to                    |     |
| 57 | trial care         |                                                             |     |
| 58 |                    |                                                             |     |
| 59 |                    |                                                             |     |
| 60 |                    |                                                             |     |



|    |                       |                      |                                            |     |
|----|-----------------------|----------------------|--------------------------------------------|-----|
| 1  |                       |                      | those who suffer harm from trial           |     |
| 2  |                       |                      |                                            |     |
| 3  |                       |                      | participation                              |     |
| 4  |                       |                      |                                            |     |
| 5  |                       |                      |                                            |     |
| 6  | Dissemination         | <a href="#">#31a</a> | Plans for investigators and sponsor to     | 18  |
| 7  |                       |                      |                                            |     |
| 8  | policy: trial results |                      | communicate trial results to               |     |
| 9  |                       |                      |                                            |     |
| 10 |                       |                      | participants, healthcare professionals,    |     |
| 11 |                       |                      |                                            |     |
| 12 |                       |                      | the public, and other relevant groups      |     |
| 13 |                       |                      |                                            |     |
| 14 |                       |                      | (eg, via publication, reporting in results |     |
| 15 |                       |                      | databases, or other data sharing           |     |
| 16 |                       |                      | arrangements), including any               |     |
| 17 |                       |                      |                                            |     |
| 18 |                       |                      | publication restrictions                   |     |
| 19 |                       |                      |                                            |     |
| 20 |                       |                      |                                            |     |
| 21 |                       |                      |                                            |     |
| 22 |                       |                      |                                            |     |
| 23 |                       |                      |                                            |     |
| 24 |                       |                      |                                            |     |
| 25 | Dissemination         | <a href="#">#31b</a> | Authorship eligibility guidelines and any  | 18  |
| 26 |                       |                      |                                            |     |
| 27 | policy: authorship    |                      | intended use of professional writers       |     |
| 28 |                       |                      |                                            |     |
| 29 |                       |                      |                                            |     |
| 30 | Dissemination         | <a href="#">#31c</a> | Plans, if any, for granting public access  | n/a |
| 31 |                       |                      |                                            |     |
| 32 | policy:               |                      | to the full protocol, participant-level    |     |
| 33 |                       |                      |                                            |     |
| 34 | reproducible          |                      | dataset, and statistical code              |     |
| 35 |                       |                      |                                            |     |
| 36 |                       |                      |                                            |     |
| 37 | research              |                      |                                            |     |
| 38 |                       |                      |                                            |     |
| 39 |                       |                      |                                            |     |
| 40 | <b>Appendices</b>     |                      |                                            |     |
| 41 |                       |                      |                                            |     |
| 42 |                       |                      |                                            |     |
| 43 | Informed consent      | <a href="#">#32</a>  | Model consent form and other related       |     |
| 44 |                       |                      |                                            |     |
| 45 | materials             |                      | documentation given to participants        |     |
| 46 |                       |                      |                                            |     |
| 47 |                       |                      | and authorised surrogates                  |     |
| 48 |                       |                      |                                            |     |
| 49 |                       |                      |                                            |     |
| 50 |                       |                      |                                            |     |
| 51 | Biological            | <a href="#">#33</a>  | Plans for collection, laboratory           | 11  |
| 52 |                       |                      |                                            |     |
| 53 | specimens             |                      | evaluation, and storage of biological      |     |
| 54 |                       |                      |                                            |     |
| 55 |                       |                      | specimens for genetic or molecular         |     |
| 56 |                       |                      |                                            |     |
| 57 |                       |                      | analysis in the current trial and for      |     |
| 58 |                       |                      |                                            |     |
| 59 |                       |                      |                                            |     |
| 60 |                       |                      |                                            |     |

1 future use in ancillary studies, if

2  
3 applicable

4  
5  
6 None The SPIRIT checklist is distributed under the terms of the Creative Commons Attribution

7  
8 License CC-BY-ND 3.0. This checklist can be completed online using <https://www.goodreports.org/>, a

9  
10 tool made by the [EQUATOR Network](#) in collaboration with [Penelope.ai](#)

11  
12  
13  
14  
15  
16  
17  
18  
19  
20  
21  
22  
23  
24  
25  
26  
27  
28  
29  
30  
31  
32  
33  
34  
35  
36  
37  
38  
39  
40  
41  
42  
43  
44  
45  
46  
47  
48  
49  
50  
51  
52  
53  
54  
55  
56  
57  
58  
59  
60

For peer review only

# BMJ Open

## Effect of wheelchair-modified rowing exercise on cardiometabolic risk factors in spinal cord injured wheelchair users – Protocol for a randomized controlled trial

|                                 |                                                                                                                                                                                                                                                                                                                                                                                                                                                                                                                                                                                                                                                                                                                    |
|---------------------------------|--------------------------------------------------------------------------------------------------------------------------------------------------------------------------------------------------------------------------------------------------------------------------------------------------------------------------------------------------------------------------------------------------------------------------------------------------------------------------------------------------------------------------------------------------------------------------------------------------------------------------------------------------------------------------------------------------------------------|
| Journal:                        | <i>BMJ Open</i>                                                                                                                                                                                                                                                                                                                                                                                                                                                                                                                                                                                                                                                                                                    |
| Manuscript ID                   | bmjopen-2020-040727.R1                                                                                                                                                                                                                                                                                                                                                                                                                                                                                                                                                                                                                                                                                             |
| Article Type:                   | Protocol                                                                                                                                                                                                                                                                                                                                                                                                                                                                                                                                                                                                                                                                                                           |
| Date Submitted by the Author:   | 09-Sep-2020                                                                                                                                                                                                                                                                                                                                                                                                                                                                                                                                                                                                                                                                                                        |
| Complete List of Authors:       | Hansen, Rasmus; Aalborg Universitet, Health Science and Technology, Sport Sciences – Performance and Technology; Professionshøjskolen University College Nordjylland, Research and Innovation<br>Samani, Afshin; Aalborg Universitet, Health Science and Technology, Sport Sciences – Performance and Technology<br>Laessoe, Uffe; Professionshøjskolen University College Nordjylland, Physiotherapy; Professionshøjskolen University College Nordjylland, Research and Innovation<br>Handberg, Aase; Aalborg University Hospital, Clinical Biochemistry; Aalborg Universitet, Clinical Medicine<br>Larsen, Ryan; Aalborg Universitet, Health Science and Technology, Sport Sciences – Performance and Technology |
| <b>Primary Subject Heading</b>: | Rehabilitation medicine                                                                                                                                                                                                                                                                                                                                                                                                                                                                                                                                                                                                                                                                                            |
| Secondary Subject Heading:      | Cardiovascular medicine, Sports and exercise medicine, Public health                                                                                                                                                                                                                                                                                                                                                                                                                                                                                                                                                                                                                                               |
| Keywords:                       | REHABILITATION MEDICINE, Physiology < NATURAL SCIENCE DISCIPLINES, Coronary heart disease < CARDIOLOGY, Neurological injury < NEUROLOGY, PUBLIC HEALTH, ULTRASONOGRAPHY                                                                                                                                                                                                                                                                                                                                                                                                                                                                                                                                            |
|                                 |                                                                                                                                                                                                                                                                                                                                                                                                                                                                                                                                                                                                                                                                                                                    |

SCHOLARONE™  
Manuscripts



I, the Submitting Author has the right to grant and does grant on behalf of all authors of the Work (as defined in the below author licence), an exclusive licence and/or a non-exclusive licence for contributions from authors who are: i) UK Crown employees; ii) where BMJ has agreed a CC-BY licence shall apply, and/or iii) in accordance with the terms applicable for US Federal Government officers or employees acting as part of their official duties; on a worldwide, perpetual, irrevocable, royalty-free basis to BMJ Publishing Group Ltd ("BMJ") its licensees and where the relevant Journal is co-owned by BMJ to the co-owners of the Journal, to publish the Work in this journal and any other BMJ products and to exploit all rights, as set out in our [licence](#).

The Submitting Author accepts and understands that any supply made under these terms is made by BMJ to the Submitting Author unless you are acting as an employee on behalf of your employer or a postgraduate student of an affiliated institution which is paying any applicable article publishing charge ("APC") for Open Access articles. Where the Submitting Author wishes to make the Work available on an Open Access basis (and intends to pay the relevant APC), the terms of reuse of such Open Access shall be governed by a Creative Commons licence – details of these licences and which [Creative Commons](#) licence will apply to this Work are set out in our licence referred to above.

Other than as permitted in any relevant BMJ Author's Self Archiving Policies, I confirm this Work has not been accepted for publication elsewhere, is not being considered for publication elsewhere and does not duplicate material already published. I confirm all authors consent to publication of this Work and authorise the granting of this licence.

1  
2  
3  
4 1 **Effect of wheelchair-modified rowing exercise on cardiometabolic risk factors in spinal cord**  
5 **injured wheelchair users – Protocol for a randomized controlled trial**  
6  
7

8 3 Rasmus Kopp Hansen, MSc<sup>1,2</sup>, Afshin Samani, PhD<sup>1</sup>, Uffe Laessoe, PhD<sup>2</sup>, Aase Handberg, DMSc, MD<sup>3,4</sup>,  
9 4 Ryan Godsk Larsen, PhD<sup>1</sup>  
10  
11

12 5  
13  
14 6 *<sup>1</sup>Department of Health Science and Technology, Sport Sciences – Performance and Technology, Aalborg*  
15 *University, Aalborg, Denmark*  
16 7

17 8 *<sup>2</sup>Department of Physiotherapy / Research and Innovation, University College of Northern Denmark,*  
18 *Aalborg, Denmark*  
19 9

20 10 *<sup>3</sup>Department of Clinical Biochemistry, Aalborg University Hospital, Aalborg, Denmark*  
21

22 11 *<sup>4</sup>Department of Clinical Medicine, Aalborg University, Aalborg, Denmark*  
23

24 12 **Corresponding author:**

25 13 Rasmus Kopp Hansen, MSc.

26 14 Department of Health Science and Technology, Sports Sciences – Performance and Technology

27 15 Aalborg University

28 16 Niels Jernes Vej 12, A5-209

29 17 DK-9220 Aalborg

30 18 Denmark

31 19 Telephone: +4520892317

32 20 Email [rkopp@hst.aau.dk](mailto:rkopp@hst.aau.dk)  
33  
34  
35  
36  
37  
38  
39  
40  
41  
42  
43  
44  
45  
46  
47  
48  
49  
50  
51  
52  
53  
54  
55  
56  
57  
58  
59  
60

## 30 **ABSTRACT**

### 31 **Introduction**

32 Cardiovascular and metabolic diseases are a growing concern for individuals with spinal cord injury (SCI).  
33 Physical inactivity contributes to cardiometabolic morbidity and mortality in the SCI population. However,  
34 previous studies have shown mixed results regarding the effects of exercise on cardiometabolic risk factors  
35 in individuals with SCI. This discrepancy could be influenced by insufficient exercise stimuli. Recent  
36 guidelines recommend 30 minutes of moderate-to-vigorous intensity aerobic exercise, three times a week, for  
37 improvement in cardiometabolic health in individuals with SCI. However, to date, no studies have  
38 implemented an exercise intervention matching the new recommendations to examine the effects on  
39 cardiometabolic risk factors. Therefore, the primary objective of this study is to determine the effects of 12-  
40 weeks of wheelchair user-modified upper-body rowing exercise on both traditional (constituents of the  
41 metabolic syndrome) and novel (e.g. vascular structure and function) cardiometabolic risk factors in manual  
42 wheelchair users with SCI.

### 43 **Methods and analysis**

44 A randomized controlled trial will compare 12-weeks of upper-body rowing exercise, 30 minutes three times  
45 per week, with a control group continuing their normal lifestyle. Outcome measurements will be performed  
46 immediately before (baseline), after 6 weeks (halfway), 12 weeks of training (post), and 6 months after the  
47 termination of the intervention period (follow up). Outcomes will include inflammatory (e.g. C-reactive  
48 protein) and metabolic biomarkers determined from venous blood (with serum fasting insulin as primary  
49 outcome), body composition, arterial blood pressure, cardiorespiratory fitness level, brachial artery vascular  
50 structure and function, and autonomic nervous system function.

### 51 **Ethics and dissemination**

52 This trial is reported to the Danish Data Protection Agency (J.nr. 2019-899/10-0406) and approved by the  
53 Committees on Health Research Ethics in The North Denmark Region on 12 December 2019 (Journal-nr. N-  
54 20190053). The principal investigator will collect written informed consent from all participants prior to  
55 inclusion. Irrespective of study outcomes, the results will be submitted to peer-reviewed scientific journals  
56 for publication.

### 57 **Trial registration number**

58 NCT04390087.

## 60 **ARTICLE SUMMARY**

### 61 **Strengths and limitations of this study**

- 1  
2  
3  
4 62 • The frequency, duration and intensity of the exercise intervention follows recently published  
5 exercise recommendations for individuals with SCI.  
6 63  
7 64 • This study uses a randomized controlled design to examine the effects of a novel exercise modality  
8 on both traditional and novel cardiometabolic risk factors.  
9 65  
10 66 • The exercise modality (upper-body rowing) includes not only an aerobic component, but also an  
11 element of resistance training for the posterior shoulder region, potentially ameliorating shoulder  
12 pain.  
13 67  
14 68  
15 69 • Lack of control of food intake is a study limitation as altered energy intake could influence the  
16 interpretation of the effects of exercise on body mass and body composition  
17 70  
18  
19 71  
20 72  
21 73  
22  
23 74  
24  
25 75  
26  
27 76  
28  
29 77  
30  
31 78  
32  
33 79  
34  
35 80  
36  
37 81  
38  
39 82  
40  
41 83  
42  
43 84  
44  
45 85  
46  
47 86  
48  
49 87  
50  
51 88  
52  
53  
54  
55  
56  
57  
58  
59  
60

For peer review only

## 89 INTRODUCTION

90 Individuals with spinal cord injury (SCI) are placed at the lowest end of the fitness continuum<sup>1</sup>. Thus  
91 cardiovascular disease and metabolic dysfunction is a growing concern in this population<sup>2,3</sup>. In recent years,  
92 cardiovascular disease has emerged as the leading cause of mortality in individuals with chronic SCI<sup>4</sup>.

93 Factors contributing to high cardiometabolic morbidity and mortality in individuals with SCI are sedentary  
94 lifestyle and low physical activity level<sup>5</sup>, and the ensuing negative influence on body composition, reflected  
95 by lower fat-free mass and larger amount of adipose tissue<sup>6</sup>.

96 The clinical manifestations of SCI rely on the level of neurological injury and the completeness of injury<sup>7</sup>.  
97 SCI can result in complete or partial loss of sensorimotor function below the level of injury. In general, a  
98 cervical injury leads to impairment of all four extremities (i.e. both arms and legs) as well as the trunk and  
99 pelvic organs (tetraplegia), whereas an injury to the thoracic, lumbar or sacral spine preserves functioning of  
100 the arms (paraplegia)<sup>8</sup>. In addition to the impairment of sensorimotor function, SCI can disrupt sympathetic  
101 nervous system function as preganglionic sympathetic neurons are located between the T1 and L2 spinal  
102 segment<sup>7</sup>. Due to an increased amount of paralyzed muscle mass and larger disruption of the autonomic  
103 nervous system, lower physical capacity<sup>9</sup> and heightened cardiovascular risk<sup>10</sup> are generally observed  
104 among individuals with a high (tetraplegic) and complete SCI. The loss of sensorimotor function in the lower  
105 extremities forces many individuals with SCI to rely on a wheelchair for mobility. For those wheelchair users  
106 with sufficient strength and movement control in the arms, a manual wheelchair (i.e. a wheelchair that can be  
107 propelled by the user) is typical used for mobility<sup>11</sup>.

108 Besides the obvious limitation to physical activities requiring ambulation, explanations for the adoption of a  
109 sedentary lifestyle are multifactorial, but studies have identified intrapersonal and socio-environmental  
110 physical activity barriers in manual wheelchair users with SCI<sup>12-14</sup>. Some barriers such as the intrapersonal  
111 barriers of lack of time<sup>15</sup> or energy<sup>16</sup> identified by individuals with mobility disabilities are consistent with  
112 those reported in the non-disabled population. Other barriers are specific to the mobility of individuals with  
113 disability, such as organizational or structural barriers (e.g. lack of accessible fitness centers<sup>12</sup> and adaptive  
114 exercise equipment<sup>13</sup>) and community built environment barriers<sup>17</sup>. Consequently, new approaches to support  
115 the initiation and perseverance of physical activity in this population are required.

116 The majority of previous exercise intervention studies have used isolated aerobic exercise, often in the form  
117 of arm-cranking exercise<sup>18</sup>. These studies have demonstrated improvements in traditional risk factors for  
118 cardiometabolic diseases, such as high-density cholesterol (HDL-C)<sup>19</sup>, fasting insulin<sup>20</sup>, and indices of  
119 insulin resistance<sup>21</sup>, whereas the effects on arterial blood pressure<sup>22</sup>, blood lipids (e.g. low-density  
120 cholesterol (LDL-C) and triacylglycerol) are inconclusive<sup>20,23,22</sup>. Moreover, although evidence from cross-  
121 sectional studies suggests an association between increased participation in moderate-to-vigorous intensity  
122 leisure time physical activity and a reduction in visceral adipose tissue<sup>24</sup>, there is insufficient evidence for



1  
2  
3  
4 123 the effects of upper-body aerobic exercise on changes in body mass and body composition, such as a  
5  
6 124 reduction in total and visceral adipose tissue<sup>18,25,26</sup>. The explanation for the lack of an exercise effect on  
7  
8 125 some of these above mentioned risk factors is not clear, but could be related to insufficient volume<sup>20,22</sup> or  
9  
10 126 intensity<sup>25</sup> of exercise, performed with limited amount of skeletal muscle mass.

11 127 Notably, in able-bodied individuals, the exercise-induced risk reduction in cardiovascular diseases cannot be  
12  
13 128 fully explained by traditional risk factors (constituents of the metabolic syndrome), i.e. there is a risk factor  
14  
15 129 gap<sup>27</sup>. As a consequence, studies have started to focus on the effects of exercise on changes in the vascular  
16  
17 130 wall<sup>27</sup>. It is known that dysfunction of the vascular endothelium occurs at the very early phases of  
18  
19 131 atherosclerosis<sup>28</sup>. For instance, flow-mediated dilation (FMD), a non-invasive measure of nitric oxide (NO)  
20  
21 132 dependent endothelial function<sup>29</sup>, is a strong predictor of future cardiovascular events<sup>30</sup>. In addition, carotid  
22  
23 133 intima media thickness (IMT), a measure of vessel wall thickness<sup>31</sup> has shown to be associated with future  
24  
25 134 vascular events, such as the occurrence of stroke and myocardial infarction<sup>31</sup>. Accumulating evidence in  
26  
27 135 able-bodied individuals demonstrates beneficial effects of exercise on structural and functional adaptations  
28  
29 136 of the vasculature<sup>32</sup>. However, little is known about the effects of exercise on the vasculature in individuals  
30  
31 137 with SCI.

32 138 Reductions in femoral artery (lower body) diameter occurs rapidly in response to extreme inactivity, as  
33  
34 139 observed within three weeks off acquiring a SCI<sup>33</sup>. De Groot et al.<sup>34</sup> found similar FMD in the brachial  
35  
36 140 artery among untrained SCI when compared to able-bodied individuals, however when FMD was normalized  
37  
38 141 to the shear stress stimulus, the dilation response was reduced in the SCI group, indicating some degree of  
39  
40 142 endothelial dysfunction in this population<sup>35</sup>. Other observational studies have demonstrated both larger  
41  
42 143 conduit artery diameter and blood flow in the subclavian artery<sup>36</sup>, and larger brachial diameter<sup>34</sup> in  
43  
44 144 wheelchair athletes compared to non-athlete able-bodied controls. Together these findings indicate that  
45  
46 145 remodeling of the vasculature also occurs in response to regular exercise in wheelchair users with SCI.  
47  
48 146 However, the causal link between adaptations of the upper body arteries and repetitive exercise stimulus in  
49  
50 147 SCI is not fully established. Therefore, the relationship between exercise and vascular remodeling in manual  
51  
52 148 wheelchair users needs to be determined through controlled exercise studies. A recent experimental study  
53  
54 149 consisting of supervised aerobic exercise (20min, twice per week), adhering to the earlier (2011) exercise  
55  
56 150 guidelines for adults with SCI<sup>37</sup>, was successful in improving measures of cardiorespiratory fitness and  
57  
58 151 muscle strength<sup>38</sup>. Yet, Zepetnek et al.<sup>22</sup> demonstrated that this exercise paradigm (20min, twice per week)  
59  
60 152 did not improve markers of cardiovascular disease risk, including carotid IMT and brachial FMD. Recent  
61  
62 153 (2018) guidelines recommend at least 30 min of moderate-to-vigorous intensity aerobic exercise, three times  
63  
64 154 per week in order to improve cardiometabolic health in individuals with SCI<sup>39</sup>, suggesting that insufficient  
65  
66 155 exercise stimuli may explain the lack of vascular adaptations in the study by Zepetnek et al.<sup>22</sup>. Notably, to  
67  
68 156 date, no studies have examined the effects of the updated exercise guidelines (30 min of moderate-to-

1  
2  
3  
4 157 vigorous intensity aerobic exercise, three times per week) on vascular adaptations in manual wheelchair  
5  
6 158 users with SCI.  
7  
8 159 While isolated aerobic exercise, via arm-cranking or wheelchair ergometry, evokes positive effects on  
9  
10 160 cardiorespiratory fitness, these modalities/types of exercises fail to address the importance of strengthening  
11 161 the posterior shoulder musculature of the upper-extremity for individuals with SCI relying on a manual  
12  
13 162 wheelchair for mobility<sup>40</sup>. In addition, these modalities use repetitive contractions of the shoulder  
14  
15 163 musculature engaged in daily wheelchair propulsion activities, thereby increasing the risk of developing  
16 164 shoulder pain<sup>41-43</sup>. Studies have reported high prevalence of shoulder pain in long-term wheelchair users  
17  
18 165<sup>44,45</sup>, which prevents these individuals from engaging in physical activity<sup>46</sup>. As wheelchair users rely on their  
19 166 upper-extremities for most daily activities, upper-extremity pain must be prevented or limited to preserve  
20  
21 167 function, independence and quality of life (QOL)<sup>21,47</sup>. Indeed, health related QOL is lower in adults with SCI  
22 168 compared with the able-bodied population<sup>48,49</sup>. The development of shoulder pain has been suggested to  
23  
24 169 occur due to chronic overuse, shoulder strength imbalances between anterior and posterior musculature,  
25  
26 170 postural changes and impingement syndrome<sup>50-52</sup>. Considering the general need for strong upper extremities  
27 171 to bear weight during different transfer tasks<sup>53</sup>, to propel wheelchair<sup>54</sup>, and to reach overhead levels<sup>55</sup>, the  
28  
29 172 inclusion of resistance training in exercise training paradigms seems prudent. One modality that combines  
30  
31 173 aerobic and resistance components is rowing<sup>56</sup>. Specifically, it has been shown that wheelchair user-  
32 174 modified upper-body rowing ergometry challenges the cardiovascular system comparable to arm-cranking<sup>41</sup>.  
33  
34 175 Additionally, upper-body rowing mirrors the muscle activation observed during traditional resistance  
35 176 training for the scapular retractors<sup>57</sup>. Earlier research has demonstrated beneficial effects of resistance  
36  
37 177 training of the posterior shoulder and scapular retractor musculature on shoulder pain<sup>47,55,58</sup>. Thus, the use of  
38 178 upper-body rowing ergometry may evoke positive effects on both cardiometabolic health and shoulder pain  
39  
40 179 in manual wheelchair users, the latter through alterations in posterior vs. anterior upper-body muscle strength  
41 180 balance. However, to date, no studies have implemented upper-body rowing ergometry as exercise modality  
42  
43 181 in this population.

44 182

## 46 183 **Objectives**

47

48 184 The primary objective of this study is to determine the effects of 12-weeks of wheelchair user-modified  
49  
50 185 upper-body rowing on both traditional (insulin resistance, obesity, dyslipidemia (including low HDL-C and  
51  
52 186 elevated triglycerides, and blood pressure) and novel (inflammatory status, autonomic nervous system  
53 187 function, vascular structure and function, and cardiorespiratory fitness level) cardiometabolic risk factors in  
54  
55 188 manual wheelchair users with SCI. As secondary objectives, we will investigate the effects of the exercise  
56 189 intervention on leisure time physical activity, shoulder pain, indices of QOL, and feasibility of the  
57  
58 190 intervention.

59

60

## METHODS AND ANALYSIS

### Study design

A randomized controlled trial designed to determine the effects of 12 weeks of exercise training on cardiometabolic risk, indices of QOL, and shoulder pain, will be conducted in accordance with the Standard Protocol Items: Recommendations for Interventional Trials (SPIRIT) statement<sup>59</sup>. The trial is registered as a controlled trial on 15 May 2020 (NCT04390087) with first enrolment beginning in November 2020. The study overview is presented in Figure 1. After giving written informed consent to participate in the study (see online supplementary appendix for details about the model consent form), participants will undergo baseline testing, after which they will be randomly assigned to either a control group or an exercise group (allocation ratio, 1:1), stratified for age, self-reported leisure time physical activity level, and SCI level. Randomization will be conducted using a computer-generated random number sequence (<https://www.randomizer.org/>). Outcome measurements will be performed immediately before (baseline), after 6 weeks (halfway), 12 weeks of training (post), and 6 months after the termination of the intervention period (follow up). This approach allows for assessment of the short term effects of exercise training as well as any residual effects from the training intervention on cardiometabolic risk, shoulder pain, indices of QOL, and self-reported leisure time physical activity. Participants will be asked to maintain their normal dietary habits throughout the study period.

### Participants

#### *Inclusion criteria*

Men and women; aged 18-65 years; chronic SCI ( $\geq 1$  year since injury); individuals with sufficient sparing of arm flexor function to participate in upper-body rowing (i.e. as a minimum excluding individuals with complete SCI at or above C5); using a manual wheelchair as a primary tool for mobility. Volunteers will be asked to self-report SCI level and completeness and to provide a copy of the part of their medical records that confirm injury level and American Spinal Injury Association (ASIA) impairment scale classification before any measurements are commenced. In addition, volunteers will be asked to briefly perform the rowing exercise during the first laboratory visit to ensure that the individual is able to perform the exercise intervention. As part of the screening, volunteers will also be asked to indicate smoking habits, known medical issues, diseases or use of medication that could affect metabolism (e.g. statins or metformin) or the cardiovascular system (e.g. diuretics, beta blockers, or angiotensin-converting enzyme inhibitors).

#### *Exclusion criteria*

Individuals who regularly engage in  $>90$  min/week of moderate-to-vigorous intensity physical activity; have received a cortisone injection in the shoulder within the last four months; have had shoulder injury within the previous year; known medical issues (urinary tract infections, cardiovascular contraindications for exercise

1  
2  
3  
4  
5  
6  
7  
8  
9  
10  
11  
12  
13  
14  
15  
16  
17  
18  
19  
20  
21  
22  
23  
24  
25  
26  
27  
28  
29  
30  
31  
32  
33  
34  
35  
36  
37  
38  
39  
40  
41  
42  
43  
44  
45  
46  
47  
48  
49  
50  
51  
52  
53  
54  
55  
56  
57  
58  
59  
60

testing, and pressure sores); diagnosed diabetes or any other disease that may limit the ability to perform exercise.

## Recruitment

Starting from September 2020, participants will be recruited through notices at Aalborg University, websites seeking volunteers for research studies (e.g., [www.forsog.dk](http://www.forsog.dk)), organizations related to disability and SCI, including the Spinal Cord Injured in Denmark organization, physician clinics, wheelchair manufacturing company (Wolturnus A/S) and local community groups. Information on websites, social media, posters, flyers will be used to reach potential participants. This kind of participant recruitment can be considered passive since the participants have to choose to react on the study information<sup>60</sup>. This approach increases the risk of over representing individuals who are interested in the research area<sup>60</sup>. Considering this risk of selection bias, physician clinic visits from the principal investigator (i.e. active recruitment) will be used as an additional strategy to reach potential participants. For this study, 30 participants will be recruited. The sample size is based on the effect size (Cohen  $d$ : -0.69) for changes in fasting insulin after 6 weeks of arm-cycling exercise<sup>20</sup>. With a power of 0.9, and an alpha level of 0.05, 20 participants in total are required to detect a significant change. To account for drop-outs during the 12 week intervention, as well as potential drop-outs in the control group, 30 participants will be included in the project, with  $n=15$  allocated to the control and exercise group, respectively.

## Intervention

### *Exercise group*

Volume, intensity and frequency of the intervention is based on recent exercise recommendations for individuals with SCI<sup>39</sup>. Consequently, the training will be performed for 30 min, 3 times per week with moderate-to-vigorous intensity, with at least one rest day between sessions. Low compliance rate is a general issue in SCI exercise studies<sup>61</sup>. Compared with continuous exercise, interval-based exercise have been reported to elicit higher enjoyment in individuals with SCI<sup>62</sup>, which may increase exercise compliance. Considering this difference between continuous and interval-based exercise, the target duration of 30 min will be reached through accumulation of 5-min bouts (up to 6 bouts), with 1-2 min of rest between each bout. It is possible that some participants will not be able to exercise for 30 min with the intended intensity. Accordingly, exercise duration will be tailored to each participant's physical capacity<sup>63</sup> by gradually increasing the duration (i.e. the number of 5-min bouts) over the weeks towards the targeted 30 min (i.e. six \* 5-min bouts). Exercise intensity will be prescribed based on rating of perceived exertion (RPE) corresponding to 12-15 on the 'Borg 6-20 RPE Scale'<sup>64,65</sup>. The validity of using RPE to control moderate and vigorous exercise intensity has been demonstrated in individuals with SCI<sup>66</sup>. During the first visit, participants will be familiarized with the RPE scale<sup>67</sup> and receive detailed instructions on the use of RPE and how to rate the overall exertion based on an integration of central and peripheral sensations of effort<sup>66</sup>. Some

1  
2  
3  
4 258 controversy exists about the validity of using overall RPE to monitor exercise intensity<sup>67,68</sup>, as the  
5  
6 259 relationships between overall RPE and objective physiological markers such as oxygen consumption (VO<sub>2</sub>),  
7  
8 260 heart rate (HR) and ventilation (VE) in individuals with SCI have been questioned<sup>68</sup>. This have led some  
9  
10 261 researchers to use a differentiated RPE scale that distinguishes between central (cardiorespiratory sensations)  
11  
12 262 and peripheral (peripheral working limbs) sensations<sup>69</sup>. However, the current evidence does not indicate  
13  
14 264 greater validity for differentiated RPE compared with overall RPE<sup>67</sup>, and therefore overall RPE will be used  
15  
16 265 to guide exercise intensity.

16 265 Each training session will consist of aerobic exercise performed on a wheelchair-modified upper-body  
17  
18 266 rowing ergometer (Concept 2, Morrisville, Vermont, USA). Due to the pulling motion of the upper-body  
19  
20 267 during rowing, this modality also includes a component of resistance exercise<sup>56</sup>. The modification of the  
21  
22 268 ergometer is made by separating it into two parts using an Adapt2row<sup>1</sup>, allowing the participants to sit in  
23  
24 270 their wheelchair while performing upper-body rowing. Wedges will be positioned under the rear wheels to  
25  
26 271 keep the wheelchair in place. Further, in case of SCI related insufficient innervation of torso musculature,  
27  
28 272 straps will be wrapped around the back of the wheelchair and around the trunk of the participant, thereby  
29  
30 273 securing the participant to the wheelchair. A pilot study<sup>41</sup> has provided promising results regarding the  
31  
32 274 feasibility of using adaptive upper-body rowing exercise in the SCI population. Participants will be asked to  
33  
34 275 empty their bladder before each training session. Average power output (W) will be recorded during each  
35  
36 276 exercise session to monitor training load and quantify progress in work capacity.

34 276 All exercise sessions will be supervised by the principal investigator, who is an exercise physiologist, or by  
35  
36 277 sport science students to ensure proper assistance and guidance of the participants. Everyone involved in  
37  
38 278 supervision will be thoroughly instructed in how to supervise correct exercise technique, and they will  
39  
40 279 receive general knowledge about SCI and wheelchair use. To allow for some flexibility regarding scheduling  
41  
42 280 conflicts, participants will have opportunity to exercise 2-4 days per week, with a target of 3 days per week.  
43  
44 281 That is, in case of a missing session one week, an additional training session can be included the following  
45  
46 282 week. However, to secure adequate recovery, no more than four training days per week will be allowed. The  
47  
48 283 intervention will be terminated after 12 weeks, irrespective of any missing training sessions. An adherence  
49  
50 284 rate threshold of 75% will be used ( $\geq 27$  exercise sessions out of the maximum 36)<sup>70</sup>. However, there are no  
51  
52 285 previous reports of adherence rates for this type of exercise intervention (12 weeks of wheelchair-modified  
53  
54 286 rowing) in individuals with SCI. Therefore, if some participants show low (<75%) adherence rates, we  
55  
56 287 intend to do a sensitivity analyses in order to determine how sensitive the exercise responses are to reaching  
57  
58 288 ( $\geq 75\%$ ) or not reaching (<75%) the *a priori* set adherence rate. If adherence rate influences the exercise  
59  
60 289 response, we will consider to include adherence rate as a covariate in the statistical analyses.

---

<sup>1</sup> <http://www.adapt2row.com/>

1  
2  
3  
4 290 *Control group*

5  
6 291 The participants allocated to the control group will be asked to maintain their normal lifestyle throughout the  
7  
8 292 intervention period. When the 6-months follow-up testing has been terminated, the control group will receive  
9  
10 293 information about the exercise guidelines and the benefits of physical activity. Additionally, if requested, the  
11 294 principal investigator will organize contact to facilities where participants in the control group can perform  
12  
13 295 adapted rowing.

#### 14 15 296 **Main trial day protocol**

16  
17 297 The experimental procedures will be similar at baseline, halfway, post intervention, and at follow-up 6  
18  
19 298 months later. To account for within-day variation, the procedures will be performed at the same time of day  
20 299 for each participant. Participants will arrive at the exercise laboratory at Aalborg University for testing.  
21  
22 300 Participants will be asked to refrain from any strenuous exercise (>24 h), caffeine, alcohol, polyphenols,  
23 301 vitamin C, and supplements known to affect the cardiovascular system (>12 h), and attend in a fasted (>6 h)  
24  
25 302 state.<sup>71</sup> Any smokers must abstain from smoking for >6 h prior to each visit<sup>71</sup>. If participants are taking  
26 303 medication, a wash-out period of at least 4-5 times the half-life of the drug (typically 24-48 h) will be used.  
27  
28 304 If a drug cannot be withdrawn due to health issues, testing will be performed after a consistent time period  
29  
30 305 after intake, as recommended for studies examining vascular function<sup>71,72</sup>. On trial days, participants will  
31 306 receive a standardized snack (energy bar) after completion of the FMD measurement. Participants will be  
32  
33 307 asked to empty their bladder before any testing is commenced, and are allowed to drink water ad libitum  
34 308 during the test days.

35  
36 309  
37 310 INSERT FIGURE 1

#### 38 39 311 **Blood collection procedure**

40  
41 312 On a separate day, after an overnight fast (i.e.  $\geq 10$  hours of fasting), participants will have approximately 20  
42 313 mL blood drawn from a peripheral vein. Blood samples will be aliquoted and stored at  $-80^{\circ}$  at the  
43  
44 314 Department of Clinical Biochemistry, Aalborg University Hospital, until analyses. Blood samples will be  
45  
46 315 analyzed for indicators of cardiometabolic health (markers of glucose homeostasis, dyslipidemia, non-  
47 316 alcoholic fatty liver disease (NAFLD), and prothrombotic risk) as well as inflammatory markers (pro- and  
48  
49 317 anti-inflammatory markers). Blood sampling will be conducted within a week prior to commencing the  
50 318 intervention (baseline), between 36 and 60 hours after the last exercise session in week 6 (halfway) and week  
51  
52 319 12 (post) to minimize any effects from the last exercise session, and 6 months after the termination of the  
53  
54 320 intervention (6-months follow-up).

#### 55 56 321 **Outcome measures**

##### 57 58 322 *Primary outcome*

59  
60

1  
2  
3  
4 323 The primary outcome is fasting insulin, since it is one of the hallmarks of the metabolic syndrome<sup>73,74</sup>, and  
5  
6 324 has shown to be modifiable with exercise training in individuals with SCI<sup>20</sup>.

### 8 325 ***Secondary key outcomes***

#### 10 326 *Arterial blood pressure (BP) and resting heart rate (HR)*

12  
13 327 After resting for 10 min, participants will have their resting systolic and diastolic BP and HR measured with  
14 328 an automated BP monitoring device (OMRON M3, OMRON Healthcare, Hoofddorp, Netherlands).

15  
16 329 Measurements will be performed twice, with participants in sitting position. If these measurements deviate  
17 330 >5 %, a third measurement will be performed. The lowest values will be used for further analyses.

#### 19 331 *Body composition*

21  
22 332 Participants will have their body mass measured while sitting in their wheelchair (wearing light clothing)  
23 333 using a platform wheelchair scale (Detecto® 6550 wheelchair scale, Webb City, MO, USA). Body mass will  
24 334 be derived by subtracting the weight of the wheelchair from the total mass and rounded to the nearest 0.1 kg

25 335<sup>75</sup>. Supine height (cm) will be measured in supine position using non-elastic tape. For participants with  
26 336 contractures precluding stretching of the legs, length will be measured in segments from heel to top of the  
27 337 skull<sup>76</sup>. Body mass index (BMI) will be calculated as weight (kg) divided by height squared (m<sup>2</sup>). Waist  
28 338 circumference and waist-to-hip circumference ratio will be used as a surrogate for visceral adiposity<sup>75-77</sup>.

29  
30 339 Participants will have their waist and hip circumference measured in supine position following a deep  
31 340 expiration. Waist and hip circumference will be measured immediately below the lowest rib<sup>76</sup> and widest  
32 341 part of the trochanters<sup>77</sup>, respectively. For all circumference measurements, the tape will be placed directly  
33 342 on the skin with the participants arms by the side<sup>76</sup>. Anthropometric measures will be taken in duplicate  
34 343 (height, waist and hip circumference), rounded to the nearest 0.1 cm and reported as the mean. If the  
35 344 difference between the first and second measure is >0.1 cm, a third measure will be obtained.<sup>76</sup>

#### 42 345 *Autonomic nervous system function*

43 346 Increasing evidence suggest that autonomic dysfunction accentuates the risk for adverse cardiovascular  
44 347 events<sup>78</sup>. Individuals with SCI are prone to autonomic disturbances as a consequence of disruption to the  
45 348 spinal cord<sup>7</sup>, placing them at increased risk for autonomic related cardiovascular diseases. It is generally  
46 349 accepted that the heart in individuals with SCI below T6 is innervated by both sympathetic and  
47 350 parasympathetic neurons. In contrast, due to disruption of sympathetic outflow, parasympathetic innervation  
48 351 dominates in individuals with complete cervical and upper thoracic injuries, thereby resulting in bradycardia,  
49 352 reduced cardiac output and arterial BP<sup>7</sup>. Recently, it has been shown, however, that sympathetic control can  
50 353 be partially preserved in athletes with a cervical motor complete injury, with the degree of preservation being  
51 354 an important determinant of exercise performance<sup>79</sup>. Yet, whether exercise training can alter autonomic  
52  
53  
54  
55  
56  
57  
58  
59  
60

1  
2  
3  
4  
5  
6  
7  
8  
9  
10  
11  
12  
13  
14  
15  
16  
17  
18  
19  
20  
21  
22  
23  
24  
25  
26  
27  
28  
29  
30  
31  
32  
33  
34  
35  
36  
37  
38  
39  
40  
41  
42  
43  
44  
45  
46  
47  
48  
49  
50  
51  
52  
53  
54  
55  
56  
57  
58  
59  
60

nervous system function (e.g. balance between sympathetic and parasympathetic activity) in individuals with SCI is uncertain. Thus, as assessment of autonomic nervous system function, HR variability (HRV)<sup>78,80</sup> and arterial BP changes in response to an orthostatic challenge (sit-up tilt test)<sup>79</sup> will be measured as exploratory aims. For HRV measurements, participants will be equipped with a 4-lead surface electrodes on their chest and have their electrocardiogram (ECG) recorded (LabScribe v4, iWorx, Dover, NH, US) during 5 min of quiet rest. ECG data will be exported to dedicated software (Kubios HRV Standard 3.2.0; Kuopio, Finland) for analyses of frequency-domain parameters (low frequency power, high frequency power and total power) and time-domain parameters (HR and the root mean square of successive RR interval differences) in accordance with guidelines from The European Society of Cardiology and Heart Rhythm Society<sup>81,82</sup>. For the sit-up tilt test, participants will be equipped with a finger plethysmograph (Finometer, Finapres Medical Systems BV, Enschede, the Netherlands) for continuous and non-invasive measurement of arterial BP and HR during a 10 min orthostatic challenge (sit-up test). Briefly, after 10-15 min of supine rest with baseline recordings, participants will be moved (i.e. without assistance from the participant) to an upright seating position with their legs hanging free of the bed at an angle of 90°<sup>79</sup>. Changes in systolic BP and diastolic BP will be calculated as the difference between mean seated and supine BPs<sup>83</sup>. The presence of orthostatic hypotension will be defined as a  $\geq 20$  mm Hg drop in systolic BP or a  $\geq 10$  mm Hg drop in diastolic BP when moving to an upright position<sup>84</sup>.

#### *Vascular structure and function*

After a rest period of 10-15 min in a quiet and darkened room, vascular structure and function will be evaluated non-invasively using ultrasonography (LOGIQ S8 XDclear, GE Healthcare) following recent guidelines on assessment of conduit<sup>71,85</sup> and resistance<sup>72</sup> vessel function. Conduit artery structure will be determined in the common carotid artery (CCA) and brachial artery (BA) with B-mode echoes using a 10 MHz multifrequency linear assay ultrasound probe. Measures of CCA and BA structure will be reported as intima media thickness (IMT) (mm), lumen diameter (mm), and wall-to-lumen ratio. The B-mode image will be optimized by changing depth and resolution, and will be kept constant between study visits. To assess BA and resistance vessel function, endothelial dependent flow-mediated dilation (FMD) and reactive hyperemia will be determined by cuff occlusion followed by re-perfusion<sup>29</sup>. First, participants will have their baseline BA diameter measured for a period of 30 s. Then, a cuff placed distally on the forearm (i.e. distal to the ultrasound probe) will be inflated for 5 min up to a pressure that exceeds systolic BP by  $>50$  mmHg. After 5 min, the cuff will be deflated and post-deflation diameter and blood velocity will be continuously recorded for 3 min<sup>71</sup>. For determination of FMD, both absolute (mm) and relative (%) change in diameter from baseline to post-deflation will be calculated. Given the importance of shear stress as the stimulus for the FMD response<sup>86</sup>, continuous and simultaneous measurement of pulse-wave velocity (Doppler) and diameter (B-mode) using duplex ultrasound will be performed. This allows for an estimation



1  
2  
3  
4 389 of the shear stress stimuli through the calculation of shear rate, which then can be used to normalize the  
5  
6 390 FMD response<sup>87</sup>. Because the error of the insonation estimation increases exponentially with angles  $>60^\circ$ <sup>88</sup>,  
7  
8 391 an insonation angle of  $\leq 60^\circ$  will be used, with the sample volume adjusted to cover the total width of the  
9 392 vessel.

10  
11 393 Resistance vessel function will be determined by the magnitude of the reactive hyperemic response to cuff-  
12  
13 394 induced ischemia. Several measures obtained from the reactive hyperemic response will be reported,  
14  
15 395 including absolute blood flow (calculated based on the diameter derived cross sectional area and blood  
16 396 velocity) and velocity, peak change in blood flow, and blood flow area under the curve (AUC) across the  
17  
18 397 post-deflation time period.

19  
20 398 Although related, the measure of reactive hyperemia mirrors the magnitude of downstream resistance artery  
21  
22 399 dilation, whereas FMD represents conduit artery dilation<sup>72</sup>.

23  
24 400 To ensure that the same part of the CCA and BA will be insonated across study visits, anatomical landmarks  
25 401 will be identified and recorded together with a photo of the insonation sites. All insonation settings  
26  
27 402 (including sample volume, insonation angle, and recording time) and occlusion procedure (including cuff-  
28  
29 403 position, pressure and duration) will be held consistent within participants across study visits. For  
30 404 standardization, the same investigator will perform all measurements and all analyses (blinded to the identity  
31  
32 405 of the data).

#### 33 34 406 *Metabolic and inflammatory profile*

35  
36 407 The metabolic and inflammatory profile will be assessed via measures of glycemic control (fasting glucose,  
37  
38 408 long-term blood glucose (HbA1c, glycosylated hemoglobin), homeostatic model assessment of insulin  
39 409 resistance (HOMA-IR)), lipid profile (HDL-c, LDL-c, total cholesterol and triglycerides (TG)), pro-  
40  
41 410 inflammatory (C-reactive protein (CRP), interleukin (IL) 6, tumor necrosis factor-alpha), anti-inflammatory  
42 411 (IL-10, IL1RA)), prothrombotic (PAI-1), markers of NAFLD (hepatic enzymes (alanine-aminotransferase  
43  
44 412 (ALT) and aspartate-aminotransferase (AST)), growth differentiation factor 15 (GDF15) and fibroblast  
45  
46 413 growth factor 21 (FGF21)).

#### 47 48 414 *Cardiorespiratory fitness level*

49  
50 415 Cardiorespiratory fitness level will be determined through an incremental arm-cranking test to exhaustion,  
51 416 with peak oxygen consumption ( $VO_{2peak}$ ) and ventilatory thresholds as the outcome measures. The placement  
52  
53 417 of the ergometer (Monark 881E, Vansbro, Sverige) will be adjusted such that the participants shoulder joint  
54 418 is aligned with the crank axis with the elbows slightly bend. Participants will be equipped with a HR  
55  
56 419 monitoring belt (Suunto Ambit3 Run; Suunto, Vantaa, Finland) and a face mask, connected to an online  
57  
58 420 open-circuit metabolic cart. The cart (JAEGGER, Vyntus CPX, Carefusion) will be calibrated to known  
59 421 volumes and gas concentrations according to manufactural guidelines. After a 1-min warm-up with zero  
60

1  
2  
3  
4 422 resistance, the test begins with an individualized starting load (5-90W) <sup>89</sup> with increases in work load (5 or  
5  
6 423 10W) every minute <sup>90</sup> until volitional fatigue, defined as an inability to maintain cadence above 55 rounds  
7  
8 424 per minute (rpm) <sup>89</sup>. The individual starting load and increment size will be chosen based on training history  
9  
9 425 and anticipated physical capacity, with the aim of reaching exhaustion within 8-12 minutes at a cadence of  
10  
11 426 60-70 rpm <sup>90,91</sup>. Breath-by-breath  $\text{VO}_2$  and carbon dioxide output ( $\text{VCO}_2$ ), and HR will be measured  
12  
12 427 continuously throughout the test.  $\text{VO}_{2\text{peak}}$  will be reported in both absolute ( $\text{l O}_2 \cdot \text{min}^{-1}$ ) and relative ( $\text{ml}$   
13  
14 428  $\text{O}_2 \cdot \text{kg}^{-1} \cdot \text{min}^{-1}$ ) terms, and defined as the highest 30-s average during the test, with the corresponding HR  
15  
15 429 reported as  $\text{HR}_{\text{peak}}$ . The highest workload that is achieved for  $\geq 30$ -s will be reported as  $\text{PO}_{\text{peak}}$ . Participants  
16  
17 430 will be asked to indicate RPE (Borg 6-20 scale) during the last 15-s of each minute. On test cessation,  
18  
18 431 participants will gradually cool-down for 5-min, while their BP will be measured immediately before and  
19  
20 432 after this recovery period.

21  
22 433 As part of the cardiorespiratory fitness assessment, the first ventilatory threshold (VT1) and the second  
23  
23 434 ventilatory threshold (VT2) will be determined during the incremental arm-cranking test. V1 and V2  
24  
25 435 represents distinct physiological events, but are both related to an increase in blood lactate and a subsequent  
26  
26 436 increase in  $\text{VCO}_2$  in response to increased exercise intensity <sup>92</sup>. Each VT will be defined according to the V-  
27  
28 437 slope method or the ventilatory equivalent method, depending on which plot most clearly illustrates the  
29  
29 438 particular VT <sup>92</sup>. In addition, a plot showing the respiratory exchange ratio (RER) will be used as extra  
30  
31 439 reference in order to support the recognition of individual thresholds <sup>92</sup>. Thresholds will be determined  
32  
33 440 independently by two researchers, with the average value used for analysis <sup>93</sup>. In case of deviation of  $>5\%$   
34  
34 441 for individual thresholds, the disparity will be discussed and a mutual agreement will be found <sup>93</sup>. Although  
35  
36 442 1-min stages seems short for the attainment of steady state, the usage of 1-min stages have previously shown  
37  
37 443 to be efficient for the detection of VTs on a group level, especially in paraplegics <sup>92</sup>.

### 41 445 ***Other secondary outcomes***

#### 43 446 *Shoulder pain*

45  
46 447 The prevalence and severity of shoulder pain will be assessed using the Danish version <sup>94</sup> of the Wheelchair  
47  
47 448 Users Shoulder Pain Index (WUSPI) <sup>95</sup>. WUSPI is a valid and reliable measure of shoulder pain in manual  
48  
49 449 wheelchair users <sup>51</sup> The questionnaire utilizes a series of visual analog scales (VAS) ranging from “no pain”  
50  
51 450 to “worst pain ever experienced”, and it is a self-reported measure of the prevalence and severity of shoulder  
52  
52 451 pain during different activities such as dressing, bathing, transfer, wheeling up, sleeping etc. <sup>95</sup>. Some  
53  
54 452 participants may not perform all of the 15 activities. To account for that, a performance-corrected shoulder  
55  
55 453 pain score (PC-WUSPI) will be calculated by dividing the raw total WUSPI score by the number of  
56  
57 454 performed activities, multiplied by 15 <sup>96</sup>.

#### 59 455 *Health-related quality of life (HRQOL)*

HRQOL will be monitored using the Danish translated version of the Short Form-36 (SF-36)<sup>97</sup>, which is a reliable and validated questionnaire to assess HRQOL within both a physical and mental health domain<sup>98</sup>. Certain questions of the SF-36 will be adapted to wheelchair use. Specifically, the questions referring to 'walk' and 'stair-climbing' is substituted by the words 'climb' and 'go up', as previously recommended<sup>99</sup>. Construct validity stays acceptable with this modification<sup>99</sup>. Data will be scored using the RAND 36-item Health survey 1.0 method<sup>100</sup>, in which original responses is transformed into a score from 0-100, with 100 representing the best possible health. Individual item scores is then averaged within domains to create eight subscales, four representing physical QOL and four representing mental QOL. For reporting of HRQOL, a physical component summary score (PCS) and a mental component summary score (MCS) will be created based on the average of each component subscales<sup>101</sup>.

#### *Leisure time physical activity*

To determine the effects of the exercise intervention on short-term (6 and 12-weeks follow-up) and long-term (6-months follow-up) habitual physical activity, leisure time physical activity levels will be monitored using the Leisure Time Physical Activity Questionnaire for People with Spinal Cord Injury (LTPAQ-SCI)<sup>102</sup>. In brief, the LTPAQ-SCI is a valid and reliable self-reported measure of leisure time physical activity that assesses minutes of mild, moderate, and heavy intensity leisure time physical activity performed over the previous 7 days<sup>102</sup>. Participants in both the intervention and the control group will be asked to complete the LTPAQ-SCI once every week throughout the 12-weeks intervention period and again once during the week leading up to the 6-months follow-up. In addition, completion of the LTPAQ-SCI will work as a training diary for the intervention group, allowing us to monitor leisure time physical activity performed beyond the amount related to the exercise intervention, which will strengthen our ability to interpret the results from the intervention.

#### *Feasibility and acceptability of the exercise intervention*

Satisfaction with the exercise intervention will be evaluated with the Feasibility and Acceptability Questionnaire<sup>103</sup>. In brief, participants will be asked to rate how feasible and acceptable they consider the rowing exercise to be on a Likert scale ranging from 1 (strongly disagree) to 5 (strongly agree). The questionnaire consists of six questions addressing issues such as how fun the exercise was perceived; the difficulty level of the exercise; and whether they received appropriate guidance in how to perform the exercise. A mean score of  $\geq 3.0$  will be used as a criterion to indicate that the intervention is acceptable<sup>103</sup>. Additionally, compliance to the exercise intervention will be recorded and presented as compliance rate (% participation). Compliance is defined as the number of exercise sessions completed out of the total number (36) of sessions.

#### **Statistics**

1  
2  
3  
4  
5  
6  
7  
8  
9  
10  
11  
12  
13  
14  
15  
16  
17  
18  
19  
20  
21  
22  
23  
24  
25  
26  
27  
28  
29  
30  
31  
32  
33  
34  
35  
36  
37  
38  
39  
40  
41  
42  
43  
44  
45  
46  
47  
48  
49  
50  
51  
52  
53  
54  
55  
56  
57  
58  
59  
60

The between group difference in changes of outcome variables will be examined from baseline to 6-weeks follow-up (secondary endpoint), from baseline to post intervention (12-weeks follow-up; primary endpoint) and again from post intervention to follow-up 6-months later (secondary endpoint). Primary and secondary endpoint data are ratio and interval data and will therefore be treated as continuous variables. Between group comparisons on primary and secondary endpoint will be dependent on data distribution. We anticipate data to be approximately normally distributed, however before any analysis are commenced, distribution of the data will be assessed through visual inspection of Q-Q-plots and histograms, complemented by test of deviation from normality (Shapiro Wilk test). Assuming normality, descriptive data will be presented as mean  $\pm$  standard deviation (SD), and a two-way analysis of variance (ANOVA) with repeated measurements will be used to evaluate any significant changes in outcomes between (control and exercise) and within (baseline, 6-weeks, and 12-weeks follow-up) groups from baseline to immediately after the 12-weeks intervention period. Same procedure will be done for the 6-months follow-up (factor 1: group (control and exercise), factor 2: time (baseline, 12-weeks and 6-months follow-up). Interactions between the factors will be included in the model. In case of significant F-values, post-hoc testing will be used for multiple comparisons. Effect size of change scores (Cohen's d) will be calculated in order to determine the magnitude of difference between groups. P-values and 95% confidence intervals will be reported to facilitate interpretation of the results. Statistical significance will be accepted at  $P < 0.05$ .

### **Patient and public involvement**

Neither participants nor public were involved with the conception of the research question, study design, or outcome measures, nor will they be involved with study conduction. The recruitment plan was partially planned based on feedback from the patient population. Each of the participants will receive a written summary of the study results after publication.

### **Ethics and dissemination**

Considerations are made regarding the regulation of arterial BP in the participants<sup>104 105</sup>. BP instability does occur in cervical injured individuals (tetraplegics), who may suffer from pronounced autonomic disturbances<sup>104,105</sup>. During the  $VO_{2peak}$  test and exercise sessions, special attention is devoted towards potential symptoms of autonomic dysreflexia (AD)<sup>106</sup> in individuals with  $SCI \geq T6$ . Participants will be asked to empty their bladder before any testing or training is commenced. In case of AD, the exercise is stopped and the pertinent actions are made. Occurrences of post exercise hypotension<sup>105</sup> and orthostatic hypotension<sup>104</sup> are rather uncommon in individuals with thoracic injury (paraplegics). According to the inclusion criteria of the study, only individuals with a sparing of arm flexor function (i.e. excluding individuals with a complete cervical injury  $\geq C5$  participants) will be included in the study, presumably reducing the number of included individuals with impaired BP regulation. Nevertheless, in addition to reduced vasoconstrictor drive, the ability to increase cardiac output is limited in individuals with  $SCI \geq T5-T6$  with interrupted cardiac

1  
2  
3  
4 524 sympathetic innervation, which could affect arterial BP stabilization during conditions in which peripheral  
5  
6 525 vascular resistance is further reduced (i.e. during exercise). Therefore, to identify any participants that may  
7  
8 526 be prone to experiencing post exercise hypotension, brachial artery BP will be monitored immediately after,  
9  
10 527 and again 5 min after the first  $VO_{2peak}$  test. In such cases, and assuming the hypotension is well tolerated, the  
11  
12 528 participants will be reminded to drink appropriately during and prior any future training and testing. Further,  
13  
14 530 these participants will have their BP measured every second interval (i.e. every 10<sup>th</sup> min) during the training  
15  
16 531 sessions. If hypotension develops, the training will be interrupted and hypotensive countermovements  
17  
18 532 (placement in a supine position, or legs up) will be applied. If the hypotension is not tolerated, such as if the  
19  
20 533 participants exhibit signs of nausea, light-headedness, fatigue or presyncopal symptoms in response to either  
the  $VO_{2peak}$  test or the training, they will be excluded from further participation in the study.

21 534 Another consideration is that individuals with SCI suffer from impaired thermoregulation<sup>107</sup>. Although  
22  
23 535 prolonged (60 min) moderate intensity exercise in warm conditions (>31°C) have been shown sustainable for  
24  
25 536 some paraplegic and tetraplegic individuals<sup>108</sup>, impaired thermoregulation makes individuals with SCI more  
26  
27 537 vulnerable to overheating compared to able-bodied<sup>107</sup>. This is especially the case during conditions of  
28  
29 538 increased environmental temperatures and metabolic heat production (such as when exercising in the heat).  
The degree of thermoregulatory impairment is closely related to the injury level, such that individuals with  
30  
31 540 higher injury (tetraplegics) exhibit higher core temperatures during exercise compared to lower injury  
32  
33 541 individuals (paraplegics)<sup>108</sup>. To diminish the risk for overheating during testing and training, a fan will be  
34  
35 542 available for cooling of the participants and the room temperature and humidity will be continuously  
36  
37 543 monitored to facilitate the conditions for dry and evaporative heat loss. Moreover, the participants will be  
38  
39 544 asked to pay attention to proper hydration before and throughout each training session. However, if the  
40  
41 545 participants demonstrate signs of any adverse response, the exercise session will be terminated immediately  
42  
43 546 and further participation in the study will be reconsidered. Any adverse responses from the intervention will  
44  
45 547 be reported to the regional health research committee. The trial is reported to the Danish Data Protection  
46  
47 548 Agency (J.nr. 2019-899/10-0406), registered at ClinicalTrials.gov on 15 May 2020, and approved by the  
48  
49 549 Committees on Health Research Ethics in The North Denmark Region on 12 December 2019 (Journal-nr. N-  
20190053). Results will be submitted to scientific journals related to exercise and SCI for publication  
50  
51 550 irrespective of study outcomes.

#### 50 552 **Data statement section**

51  
52 553 All participant data will be stored in a secure web-based database (Redcap) with restricted access and ID  
53  
54 554 code, in accordance with data protection rules. Source documents including date, visit# and participant ID  
55  
56 555 will be scanned and saved as electronic copies. Participant data will be transferred directly or by use of an  
57  
58 556 encrypted USB stick. Each participant will be assigned an unique identification number, which will be the  
59  
60 557 only identifier exported from Redcap upon data analysis. Except for the blood samples, which will be stored

1  
2  
3  
4  
5  
6  
7  
8  
9  
10  
11  
12  
13  
14  
15  
16  
17  
18  
19  
20  
21  
22  
23  
24  
25  
26  
27  
28  
29  
30  
31  
32  
33  
34  
35  
36  
37  
38  
39  
40  
41  
42  
43  
44  
45  
46  
47  
48  
49  
50  
51  
52  
53  
54  
55  
56  
57  
58  
59  
60

558 until analysis, or no more than 5 years, data will be stored for 5 years after the termination of the trial. After  
559 this period, paper material is shredded, data files are erased and the Redcap database is no longer accessible.  
560 The principal investigator will have access to all trial data.

### 561 **Acknowledgement**

562 The authors would like to thank Dr. Rachel E. Cowan for valuable discussions regarding the study protocol,  
563 Dr. Jan Christian Brønd for discussions regarding assessment of leisure time physical activity level, and  
564 Wolturnus A/S for lending of arm ergometer and wheelchair weight

### 565 **Author Contributions**

566 RKH and RGL conceptualized the study. RKH, AS, UL, AH and RGL contributed to the study protocol  
567 design. RKH drafted the manuscript. RKH, AS, UL, AH and RGL commented and edited the manuscript and  
568 approved the final version.

### 570 **Funding**

571 This work is supported by Aage and Johanne Louis-Hansens Fond, grant number 20-2B-5947. Aage and  
572 Johanne Louis-Hansens Fond will have no influence on any part of the project design, data collection, data  
573 analysis, data interpretation or the disclosure of the results. Thus, their support is solely economical.

### 574 **Competing interests**

575 None declared.

### 577 **Patient consent**

578 Not required.

### 579 **License statement**

580 I, the Submitting Author has the right to grant and does grant on behalf of all authors of the Work (as defined  
581 in the below author licence), an exclusive licence and/or a non-exclusive licence for contributions from  
582 authors who are: i) UK Crown employees; ii) where BMJ has agreed a CC-BY licence shall apply, and/or iii)  
583 in accordance with the terms applicable for US Federal Government officers or employees acting as part of  
584 their official duties; on a worldwide, perpetual, irrevocable, royalty-free basis to BMJ Publishing Group Ltd  
585 (“BMJ”) its licensees and where the relevant Journal is co-owned by BMJ to the co-owners of the Journal, to  
586 publish the Work in BMJ Open and any other BMJ products and to exploit all rights, as set out in  
587 our [licence](#).

588 **Figure 1.** Study overview. INT = intervention; CON = control; RPE = rating of perceived exertion; LTPA =  
589 leisure time physical activity.

1  
2  
3  
4 591 **REFERENCES**  
5  
6 592  
7  
8

- 9 593 1. LaPorte, R. *et al.* The Spectrum of Physical Activity, Cardiovascular Disease and Health: An  
10 594 Epidemiologic Perspective. *Am J Epidemiol.* **120**, 507–517 (1984).
- 11 595 2. Myers, J., Lee, M. & Kiratli, J. Cardiovascular disease in spinal cord injury: An overview of  
12 596 prevalence, risk, evaluation, and management. *Am. J. Phys. Med. Rehabil.* **86**, 142–152 (2007).
- 13 597 3. Nash, M. & Cowan, R. Cardiovascular disease, SCI and exercise: unique risks and focused  
14 598 countermeasures. *Disabil. Rehabil.* **32**, 2228–2236 (2010).
- 15 599 4. Garshick, E. *et al.* A prospective assessment of mortality in chronic spinal cord injury. *Spinal Cord*  
16 600 **43**, 408–416 (2005).
- 17 601 5. Buchholz, A. C. *et al.* Greater daily leisure time physical activity is associated with lower chronic  
18 602 disease risk in adults with spinal cord injury. *Appl. Physiol. Nutr. Metab.* **34**, 640–647 (2009).
- 19 603 6. Gorgey, A., Dolbow, D., Dolbow, J., Khalil, R. & Gater, D. Effects of spinal cord injury on body  
20 604 composition and metabolic profile – Part I. *J. Spinal Cord Med.* **37**, 693–702 (2014).
- 21 605 7. Ahuja, C. S. *et al.* Traumatic spinal cord injury. *Nat. Rev. Dis. Prim.* **3**, 1–21 (2017).
- 22 606 8. Kirshblum, S. C. *et al.* International standards for neurological classification of spinal cord injury  
23 607 (Revised 2011). *J. Spinal Cord Med.* **34**, 535–546 (2011).
- 24 608 9. Haisma, J. A. *et al.* Physical capacity in wheelchair-dependent persons with a spinal cord injury: A  
25 609 critical review of the literature. *Spinal Cord* **44**, 642–652 (2006).
- 26 610 10. Groah, S. L., Weitzenkamp, D., Sett, P., Soni, B. & Savic, G. The relationship between neurological  
27 611 level of injury and symptomatic cardiovascular disease risk in the aging spinal injured. *Spinal Cord*  
28 612 **39**, 310–317 (2001).
- 29 613 11. Spinal Cord Injury Research Evidence (SCIRE) Community. *Manual Wheelchairs. Practitioner*  
30 614 [www.scireproject.com/community/topic/manual-wheelchairs/%0AManual](http://www.scireproject.com/community/topic/manual-wheelchairs/%0AManual) (2020)  
31 615 doi:10.29085/9781783304509.002.
- 32 616 12. Kehn, M. & Kroll, T. Staying physically active after spinal cord injury: A qualitative exploration of  
33 617 barriers and facilitators to exercise participation. *BMC Public Health* **9**, 1–11 (2009).
- 34 618 13. Rimmer, J. H., Riley, B., Wang, E., Rauworth, A. & Jurkowski, J. Physical activity participation  
35 619 among persons with disabilities: Barriers and facilitators. *Am. J. Prev. Med.* **26**, 419–425 (2004).
- 36 620 14. Hansen, R. K., Larsen, R. G., Læssøe, U., Samani, A. & Cowan, R. E. Physical Activity Barriers in  
37 621 Danish Manual Wheelchair Users - A Cross-sectional Study. *Submitt. Manuscr.* (2020).
- 38 622 15. Cowan, R. E., Nash, M. S. & Anderson, K. D. Exercise participation barrier prevalence and  
39 623 association with exercise participation status in individuals with spinal cord injury. 27–32 (2013)  
40 624 doi:10.1038/sc.2012.53.
- 41 625 16. Rimmer, J. H., Rubin, S. S. & Braddock, D. Barriers to exercise in African American women with  
42 626 physical disabilities. *Arch. Phys. Med. Rehabil.* **81**, 182–188 (2000).
- 43 627 17. Rimmer, J. H., Wang, E. & Smith, D. Barriers associated with exercise and community access for  
44 628 individuals with stroke. *J. Rehabil. Res. Dev.* **45**, 315–322 (2008).
- 45 629 18. Van Der Scheer, J. W. *et al.* Effects of exercise on fitness and health of adults with spinal cord injury:  
46 630 A systematic review. *Neurology* **89**, 736–745 (2017).  
47  
48  
49  
50  
51  
52  
53  
54  
55  
56  
57  
58  
59  
60

- 1  
2  
3  
4 631 19. El-Sayed, M. S. & Younesian, A. Lipid profiles are influenced by arm cranking exercise and training  
5 632 in individuals with spinal cord injury. *Spinal Cord* **43**, 299–305 (2005).  
6  
7 633 20. Nightingale, T. E., Walhin, J. P., Thompson, D. & Bilzon, J. L. J. Impact of Exercise on  
8 634 Cardiometabolic Component Risks in Spinal Cord-injured Humans. *Med. Sci. Sports Exerc.* **49**,  
9 635 2469–2477 (2017).  
10  
11 636 21. Kim, D. Il, Lee, H., Lee, B. S., Kim, J. & Jeon, J. Y. Effects of a 6-Week Indoor Hand-Bike Exercise  
12 637 Program on Health and Fitness Levels in People With Spinal Cord Injury: A Randomized Controlled  
13 638 Trial Study. *Arch. Phys. Med. Rehabil.* **96**, 2033–2040 (2015).  
14  
15 639 22. Totosy de Zepetnek, J. O., Pelletier, C. A., Hicks, A. L. & MacDonald, M. J. Following the Physical  
16 640 Activity Guidelines for Adults With Spinal Cord Injury for 16 Weeks Does Not Improve Vascular  
17 641 Health: A Randomized Controlled Trial. *Arch. Phys. Med. Rehabil.* **96**, 1566–1575 (2015).  
18  
19 642 23. Wilt, T. J. *et al.* Carbohydrate and lipid disorders and relevant considerations in persons with spinal  
20 643 cord injury (Structured abstract). *Database Abstr. Rev. Eff.* 171 (2008).  
21  
22 644 24. Pelletier, C. A., Omidvar, M., Miyatani, M., Giangregorio, L. & Craven, B. C. Participation in  
23 645 moderate-to-vigorous leisure time physical activity is related to decreased visceral adipose tissue in  
24 646 adults with spinal cord injury. *Appl. Physiol. Nutr. Metab.* **43**, 139–144 (2018).  
25  
26 647 25. Nightingale, T. E., Metcalfe, R. S., Vollaard, N. B. & Bilzon, J. L. Exercise Guidelines to Promote  
27 648 Cardiometabolic Health in Spinal Cord Injured Humans: Time to Raise the Intensity? *Arch. Phys.*  
28 649 *Med. Rehabil.* **98**, 1693–1704 (2017).  
29  
30 650 26. Hicks, A. L. *et al.* The effects of exercise training on physical capacity, strength, body composition  
31 651 and functional performance among adults with spinal cord injury: A systematic review. *Spinal Cord*  
32 652 **49**, 1103–1127 (2011).  
33  
34 653 27. Green, D. J., Driscoll, G. O., Joyner, M. J. & Cable, N. T. Exercise and cardiovascular risk reduction :  
35 654 Time to update the rationale for exercise ? Exercise and cardiovascular risk reduction : Time to update  
36 655 the rationale for exercise ? 766–768 (2013) doi:10.1152/jappphysiol.01028.2007.  
37  
38 656 28. Gielen, S., Schuler, G. & Hambrecht, M. Exercise Training in Coronary Artery Disease and Coronary  
39 657 Vasomotion. *Circulation* **103**, 1–6 (2001).  
40  
41 658 29. Celermajer, D. *et al.* Non-invasive detection of endothelial dysfunction in children and adults at risk  
42 659 of atherosclerosis Endothelial. *Lancet* **340**, 1111–1115 (1992).  
43  
44 660 30. Yeboah, J. *et al.* Predictive value of brachial flow-mediated dilation for incident cardiovascular  
45 661 events in a population-based study: The multi-ethnic study of atherosclerosis. *Circulation* **120**, 502–  
46 662 509 (2009).  
47  
48 663 31. Lorenz, M. W., Markus, H. S., Bots, M. L., Rosvall, M. & Sitzer, M. Prediction of clinical  
49 664 cardiovascular events with carotid intima-media thickness: A systematic review and meta-analysis.  
50 665 *Circulation* **115**, 459–467 (2007).  
51  
52 666 32. Green, D. J., Hopman, M. T. E., Padilla, J., Laughlin, M. H. & Thijssen, D. H. J. Vascular adaptation  
53 667 to exercise in humans: Role of hemodynamic stimuli. *Physiol. Rev.* **97**, 495–528 (2017).  
54  
55 668 33. de Groot, P. C., Bleeker, M. W., van Kuppevelt, D. H., van der Woude, L. H. & Hopman, M. T.  
56 669 Rapid and Extensive Arterial Adaptations After Spinal Cord Injury. *Arch. Phys. Med. Rehabil.* **87**,  
57 670 688–696 (2006).  
58  
59 671 34. Rowley, N. J. *et al.* Conduit diameter and wall remodeling in elite athletes and spinal cord injury.  
60 672 *Med. Sci. Sports Exerc.* **44**, 844–849 (2012).



1  
2  
3  
4  
5  
6  
7  
8  
9  
10  
11  
12  
13  
14  
15  
16  
17  
18  
19  
20  
21  
22  
23  
24  
25  
26  
27  
28  
29  
30  
31  
32  
33  
34  
35  
36  
37  
38  
39  
40  
41  
42  
43  
44  
45  
46  
47  
48  
49  
50  
51  
52  
53  
54  
55  
56  
57  
58  
59  
60

35. de Groot, P. C. E., Poelkens, F., Kooijman, M. & Hopman, M. T. E. Preserved flow-mediated dilation in the inactive legs of spinal cord-injured individuals. *Am J Physiol Hear. Circ Physiol* **287**, 374–380 (2004).
36. Huonker, M., Schmid, A., Schmidt-Trucksäß, A., Grathwohl, D. & Keul, J. Size and blood flow of central and peripheral arteries in highly trained able-bodied and disabled athletes. *J. Appl. Physiol.* **95**, 685–691 (2003).
37. Ginis, K. A. M. *et al.* The development of evidence-informed physical activity guidelines for adults with spinal cord injury. *Spinal Cord* **49**, 1088–1096 (2011).
38. Pelletier, C. A., Totosy De Zepetnek, J. O., Macdonald, M. J. & Hicks, A. L. A 16-week randomized controlled trial evaluating the physical activity guidelines for adults with spinal cord injury. *Spinal Cord* **53**, 363–367 (2015).
39. Martin Ginis, K. A. *et al.* Evidence-based scientific exercise guidelines for adults with spinal cord injury: An update and a new guideline. *Spinal Cord* **56**, 308–321 (2018).
40. Cratsenberg, K. A. *et al.* Effectiveness of exercise programs for management of shoulder pain in manual wheelchair users with spinal cord injury. *J. Neurol. Phys. Ther.* **39**, 197–203 (2015).
41. Troy, K., Munce, T. & Longworth, J. An exercise trial targeting posterior shoulder strength in manual wheelchair users: Pilot results and lessons learned. *Disabil. Rehabil. Assist. Technol.* **10**, 415–420 (2015).
42. Nash, M. S. *et al.* A comparison of 2 circuit exercise training techniques for eliciting matched metabolic responses in persons with paraplegia. *Arch. Phys. Med. Rehabil.* **83**, 201–209 (2002).
43. Curtis, K. *et al.* Effect of a standard exercise protocol on shoulder pain in long-term wheelchair users. *Spinal Cord* **37**, 421–429 (1999).
44. Ballinger, D. A., Rintala, D. H. & Hart, K. A. The relation of shoulder pain and range-of-motion problems to functional limitations, disability, and perceived health of men with spinal cord injury: A multifaceted longitudinal study. *Arch. Phys. Med. Rehabil.* **81**, 1575–1581 (2000).
45. Nichols, P., Norman, P. & Ennis, J. Wheelchair user's shoulder? *Scand J Rehab Med* **11**, 29–32 (1979).
46. Gutierrez, D., Thompson, L., Kemp, B. & Mulroy, S. The relationship of shoulder pain intensity to quality of life, physical activity, and community participation in persons with paraplegia. *J. Spinal Cord Med.* **30**, 251–255 (2007).
47. Nash, M. S., van de Ven, I., van Elk, N. & Johnson, B. M. Effects of Circuit Resistance Training on Fitness Attributes and Upper-Extremity Pain in Middle-Aged Men With Paraplegia. *Arch. Phys. Med. Rehabil.* **88**, 70–75 (2007).
48. Leduc, B. & Lepage, Y. Health-related quality of life after spinal cord injury. *Disabil. Rehabil.* **24**, 196–202 (2002).
49. Lidal, I., Veenstra, M., Hjeltnes, N. & Biering-Sørensen, F. Health-related quality of life in persons with long-standing spinal cord injury. *Spinal Cord* **46**, 710–715 (2008).
50. Ambrosio, F. *et al.* Biomechanics and strength of manual wheelchair users. *J. Spinal Cord Med.* **28**, 407–414 (2005).
51. Curtis, K. *et al.* Reliability and validity of the Wheelchair User's Shoulder Pain Index (WUSPI). *Paraplegia* **33**, 595–601 (1995).
52. Burnham, R. S., May, L., Nelson, E., Steadward, R. & Reid, D. C. Shoulder pain in wheelchair

- 1  
2  
3  
4 715 athletes: The role of muscle imbalance. *Am. J. Sports Med.* **21**, 238–242 (1993).  
5  
6 716 53. Bayley, J., Cochran, T. & Sledge, C. The weight-bearing shoulder. The impingement syndrome in  
7 717 paraplegics. *J. Bone Jt. Surg.* **69**, 676–678 (1987).  
8  
9 718 54. Collinger, J. L. *et al.* Shoulder Biomechanics During the Push Phase of Wheelchair Propulsion: A  
10 719 Multisite Study of Persons With Paraplegia. *Arch. Phys. Med. Rehabil.* **89**, 667–676 (2008).  
11  
12 720 55. Mulroy, S. J. *et al.* Strengthening and Optimal Movements for Painful Shoulders (STOMPS) in  
13 721 Chronic Spinal Cord Injury: A Randomized Controlled Trial. *Phys. Ther.* **91**, 305–324 (2011).  
14  
15 722 56. Secher, N. The Physiology of Rowing. *J. Sports Sci.* **1**, 23–53 (1983).  
16 723 57. Olenik, L., Laskin, J., Burnham, R., Wheeler, G. & Steadward, R. Efficacy of rowing, backward  
17 724 wheeling and isolated scapular retractor exercise as remedial strength activities for wheelchair users:  
18 725 Application of electromyography. *Paraplegia* **33**, 148–152 (1995).  
19  
20 726 58. Curtis, K. *et al.* Effect of a standard exercise protocol on shoulder pain in long-term wheelchair users.  
21 727 *Spinal Cord* **37**, 421–429 (1999).  
22  
23 728 59. Chan, A. *et al.* SPIRIT 2013 Statement : Defining Standard Protocol Items for Clinical Trials. *Ann*  
24 729 *Intern Med* **158**, 200–207 (2013).  
25  
26 730 60. Lee, R. *et al.* Active vs. passive methods of recruiting ethnic minority women to a health promotion  
27 731 program. *Ann. Behav. Med.* **19**, 378–384 (1997).  
28 732 61. Ginis, K. a M. & Hicks, A. L. Exercise research issues in the spinal cord injured population. *Exerc.*  
29 733 *Sport Sci. Rev.* **33**, 49–53 (2005).  
30  
31 734 62. Astorino, T. A. & Thum, Jacob, S. Interval training elicits higher enjoyment versus moderate exercise  
32 735 in persons with spinal cord injury. *J. Spinal Cord Med.* **41**, 77–84 (2018).  
33  
34 736 63. Powell, K. E., Paluch, A. E. & Blair, S. N. Physical Activity for Health: What Kind? How Much?  
35 737 How Intense? On Top of What? *Annu. Rev. Public Health* **32**, 349–365 (2011).  
36  
37 738 64. Borg, G. Perceived exertion as an indicator of somatic stress. *Scand J Rehab Med* 92–98 (1970).  
38 739 65. Birk, T. J. & Birk, C. A. Use of Ratings of Perceived Exertion for Exercise Prescription. *Sport. Med.*  
39 740 **4**, 1–8 (1987).  
40  
41 741 66. Goosey-Tolfrey, V. *et al.* Regulating intensity using perceived exertion in spinal cord-injured  
42 742 participants. *Med. Sci. Sports Exerc.* **42**, 608–613 (2010).  
43  
44 743 67. van der Scheer, J. W., Hutchinson, M. J., Paulson, T., Martin Ginis, K. A. & Goosey-Tolfrey, V. L.  
45 744 Reliability and Validity of Subjective Measures of Aerobic Intensity in Adults With Spinal Cord  
46 745 Injury: A Systematic Review. *PM R* **10**, 194–207 (2018).  
47  
48 746 68. Lewis, J. E., Nash, M. S., Hamm, L. F., Martins, S. C. & Groah, S. L. The Relationship Between  
49 747 Perceived Exertion and Physiologic Indicators of Stress During Graded Arm Exercise in Persons  
50 748 With Spinal Cord Injuries. *Arch. Phys. Med. Rehabil.* **88**, 1205–1211 (2007).  
51  
52 749 69. Noble, B. J., Borg, G. A. V., Jacobs, I., Ceci, R. & Kaiser, P. A category-ratio perceived exertion  
53 750 scale: relationship to blood and muscle lactates and heart rate. *Med. Sci. Sport. Exerc.* **16**, 523–528  
54 751 (1983).  
55 752 70. Krassioukov, A. V. *et al.* Effects of exercise interventions on cardiovascular health in individuals  
56 753 with chronic, motor complete spinal cord injury: protocol for a randomised controlled trial  
57 754 [Cardiovascular Health/Outcomes: Improvements Created by Exercise and education in SCI (C. *BMJ*  
58 755 *Open* **9**, (2019).  
59  
60

1  
2  
3  
4  
5  
6  
7  
8  
9  
10  
11  
12  
13  
14  
15  
16  
17  
18  
19  
20  
21  
22  
23  
24  
25  
26  
27  
28  
29  
30  
31  
32  
33  
34  
35  
36  
37  
38  
39  
40  
41  
42  
43  
44  
45  
46  
47  
48  
49  
50  
51  
52  
53  
54  
55  
56  
57  
58  
59  
60

71. Thijssen, D. H. J. *et al.* Expert consensus and evidence-based recommendations for the assessment of flow-mediated dilation in humans. *Eur. Heart J.* **40**, 2534–2547 (2019).
72. Limberg, J. K. *et al.* Assessment of resistance vessel function in human skeletal muscle : guidelines for experimental design , Doppler ultrasound , and pharmacology. (2020)  
doi:10.1152/ajpheart.00649.2019.
73. Grundy, S. *et al.* Diagnosis and management of the metabolic syndrome AHA / NHLBI Scientific Statement. An American Heart Association/National Heart, Lung, and Blood Institute Scientific Statement. *Circulation* 2735–2752 (2005) doi:10.1161/CIRCULATIONAHA.105.169404.
74. Nash, M. S. *et al.* Identification and Management of Cardiometabolic Risk after Spinal Cord Injury: Clinical Practice Guideline for Health Care Providers. *Top. Spinal Cord Inj. Rehabil.* **24**, 379–423 (2018).
75. McCauley, L. S., Sumrell, R. M. & Gorgey, A. S. Anthropometric Prediction of Visceral Adipose Tissue in Persons With Motor Complete Spinal Cord Injury. *PM R* **10**, 817–825 (2018).
76. Edwards, L. A., Bugaresti, J. M. & Buchholz, A. C. The amount of visceral adipose tissue and the ratio of visceral to subcutaneous adipose tissue is greater in adults with vs. without spinal cord injury. *Faseb J.* **21**, A7–A8 (2007).
77. Sumrell, R. M., Nightingale, T. E., McCauley, L. S. & Gorgey, A. S. Anthropometric cutoffs and associations with visceral adiposity and metabolic biomarkers after spinal cord injury. *PLoS One* **13**, e0203049 (2018).
78. Joyner, M. J. & Green, D. J. Exercise protects the cardiovascular system: Effects beyond traditional risk factors. *J. Physiol.* **587**, 5551–5558 (2009).
79. West, C. R., Romer, L. M. & Krassioukov, A. Autonomic Function and Exercise Performance in Elite Athletes with Cervical Spinal Cord Injury. *Med. Sci. Sports Exerc.* **45**, 261–267 (2013).
80. Otsuka, Y., Shima, N., Moritani, T., Okuda, K. & Yabe, K. Orthostatic influence on heart rate and blood pressure variability in trained persons with tetraplegia. *Eur. J. Appl. Physiol.* **104**, 75–78 (2008).
81. Malik, M. *et al.* Heart rate variability. Standards of measurement, physiological interpretation, and clinical use. *Eur. Heart J.* **17**, 354–381 (1996).
82. Shaffer, F. & Ginsberg, J. P. An Overview of Heart Rate Variability Metrics and Norms. *Front. Public Heal.* **5**, 1–17 (2017).
83. Pelletier, C. A., Jones, G., Latimer-Cheung, A. E., Warburton, D. E. & Hicks, A. L. Aerobic capacity, orthostatic tolerance, and exercise perceptions at discharge from inpatient spinal cord injury rehabilitation. *Arch. Phys. Med. Rehabil.* **94**, 2013–2019 (2013).
84. American Autonomic Society and the American Academy of Neurology. Consensus statement on the definition of orthostatic hypotension, pure autonomic failure, and multiple system atrophy. The Consensus Committee of the American Autonomic Society and the American Academy of Neurology. *Neurology* **46**, 1470 (1996).
85. Thijssen, D. H. J. *et al.* Assessment of flow-mediated dilation in humans: A methodological and physiological guideline. *Am. J. Physiol. - Hear. Circ. Physiol.* **300**, 2–12 (2011).
86. Pyke, K. E. & Tschakovsky, M. E. Peak vs. total reactive hyperemia: Which determines the magnitude of flow-mediated dilation? *J. Appl. Physiol.* **102**, 1510–1519 (2007).
87. Padilla, J. *et al.* Normalization of flow-mediated dilation to shear stress area under the curve

- 1  
2  
3  
4 798 eliminates the impact of variable hyperemic stimulus. *Cardiovasc. Ultrasound* **6**, 1–10 (2008).  
5  
6 799 88. Thrush, A. & Hartshorne, T. *Vascular Ultrasound - How, When and Why*. Churchill Livingstone  
7 800 (2010). doi:10.1017/CBO9781107415324.004.  
8  
9 801 89. Maher, J. L. & Cowan, R. E. Comparison of 1- Versus 3-Minute Stage Duration During Arm  
10 802 Ergometry in Individuals With Spinal Cord Injury. *Arch. Phys. Med. Rehabil.* **97**, 1895–1900 (2016).  
11  
12 803 90. Eerden, S., Dekker, R. & Hettinga, F. J. Maximal and submaximal aerobic tests for wheelchair-  
13 804 dependent persons with spinal cord injury: a systematic review to summarize and identify useful  
14 805 applications for clinical rehabilitation. *Disabil. Rehabil.* **40**, 497–521 (2018).  
15 806 91. Au, J. S., De Zepetnek, J. O. T. & MacDonald, M. J. Modeling perceived exertion during graded arm  
16 807 cycling exercise in spinal cord injury. *Med. Sci. Sports Exerc.* **49**, 1190–1196 (2017).  
17  
18 808 92. Kouwijzer, I. *et al.* Interrater and intrarater reliability of ventilatory thresholds determined in  
19 809 individuals with spinal cord injury. *Spinal Cord* **57**, 669–678 (2019).  
20  
21 810 93. Leicht, C. A., Griggs, K. E., Lavin, J., Tolfrey, K. & Goosey-Tolfrey, V. L. Blood lactate and  
22 811 ventilatory thresholds in wheelchair athletes with tetraplegia and paraplegia. *Eur. J. Appl. Physiol.*  
23 812 **114**, 1635–1643 (2014).  
24  
25 813 94. Larsen, C., Hansen, S., Hansen, L., P, B. & B, J.-K. Translation and Cross-Cultural Adaptation of the  
26 814 Danish Version: Wheelchair Users Shoulder Pain Index (WUSPI). in 1 (2015).  
27  
28 815 95. Curtis, K. *et al.* Development of the Wheelchair User’s Shoulder Pain Index (WUSPI). *Paraplegia*  
29 816 **33**, 290–293 (1995).  
30 817 96. Curtis, K. A. *et al.* Shoulder pain in wheelchair users with tetraplegia and paraplegia. *Arch. Phys.*  
31 818 *Med. Rehabil.* **80**, 453–457 (1999).  
32  
33 819 97. Bjorner, J. B., Thunedborg, K., Kristensen, T. S., Modvig, J. & Bech, P. The Danish SF-36 Health  
34 820 Survey: Translation and preliminary validity studies. *J. Clin. Epidemiol.* **51**, 991–999 (1998).  
35  
36 821 98. Ware, Jr., J. E. & Sherbourne, C. D. The MOS 36-Item Short-Form Health Survey ( SF-36 ): I .  
37 822 Conceptual Framework and Item Selection Author. *Med. Care* **30**, 473–483 (1992).  
38  
39 823 99. Tate, D. G., Kalpakjian, C. Z. & Forchheimer, M. B. Quality of life issues in individuals with spinal  
40 824 cord injury. *Arch. Phys. Med. Rehabil.* **83**, 18–25 (2002).  
41 825 100. RAND, H. C. 36-Item Short Form Survey (SF-36) Scoring Instructions. [https://www.rand.org/health-](https://www.rand.org/health-care/surveys_tools/mos/36-item-short-form/scoring.html)  
42 826 [care/surveys\\_tools/mos/36-item-short-form/scoring.html](https://www.rand.org/health-care/surveys_tools/mos/36-item-short-form/scoring.html).  
43  
44 827 101. Nightingale, T. E., Rouse, P. C., Walhin, J. P., Thompson, D. & Bilzon, J. L. J. Home-Based Exercise  
45 828 Enhances Health-Related Quality of Life in Persons With Spinal Cord Injury: A Randomized  
46 829 Controlled Trial. *Arch. Phys. Med. Rehabil.* **99**, 1998-2006.e1 (2018).  
47  
48 830 102. Ginis, K. A. M., Phang, S. H., Latimer, A. E. & Arbour-Nicitopoulos, K. P. Reliability and Validity  
49 831 Tests of the Leisure Time Physical Activity Questionnaire for People with Spinal Cord Injury. *Arch.*  
50 832 *Phys. Med. Rehabil.* **93**, 677–682 (2012).  
51  
52 833 103. Visovsky, C. & Corripio, J. Feasibility and Acceptability of a Resistance Exercise Intervention: For  
53 834 Women Undergoing Chemotherapy for Breast Cancer. *Nurs. Heal.* **3**, 110–119 (2015).  
54  
55 835 104. Claydon, V. E. & Krassioukov, A. V. Orthostatic Hypotension and Autonomic Pathways after Spinal  
56 836 Cord Injury. *J. Neurotrauma* **23**, 1713–1725 (2006).  
57 837 105. Claydon, V. E., Hol, A. T., Eng, J. J. & Krassioukov, A. V. Cardiovascular Responses and  
58 838 Postexercise Hypotension After Arm Cycling Exercise in Subjects With Spinal Cord Injury. *Arch.*  
59  
60

1  
2  
3  
4  
5  
6  
7  
8  
9  
10  
11  
12  
13  
14  
15  
16  
17  
18  
19  
20  
21  
22  
23  
24  
25  
26  
27  
28  
29  
30  
31  
32  
33  
34  
35  
36  
37  
38  
39  
40  
41  
42  
43  
44  
45  
46  
47  
48  
49  
50  
51  
52  
53  
54  
55  
56  
57  
58  
59  
60

- 839 *Phys. Med. Rehabil.* **87**, 1106–1114 (2006).
- 840 106. Phillips, A. A. & Krassioukov, A. V. Contemporary Cardiovascular Concerns after Spinal Cord  
841 Injury: Mechanisms, Maladaptations, and Management. *J. Neurotrauma* **32**, 1927–1942 (2015).
- 842 107. Sawka, M., Latzka, W. & Pandolf, K. Temperature Regulation During Upper Body Exercise: Able  
843 Bodied And Spinal Cord Injured. *Med. Eng. Phys.* **21**, 132–40 (1989).
- 844 108. Price, M. & Campbell, I. Effects of spinal cord lesion level upon thermoregulation during exercise in  
845 the heat. *Med. Sci. Sports Exerc.* **35**, 1100–1107 (2003).
- 846

For peer review only

1  
2  
3  
4  
5  
6  
7  
8  
9  
10  
11  
12  
13  
14  
15  
16  
17  
18  
19  
20  
21  
22  
23  
24  
25  
26  
27  
28  
29  
30  
31  
32  
33  
34  
35  
36  
37  
38  
39  
40  
41  
42  
43  
44  
45  
46  
47  
48  
49  
50  
51  
52  
53  
54  
55  
56  
57  
58  
59  
60

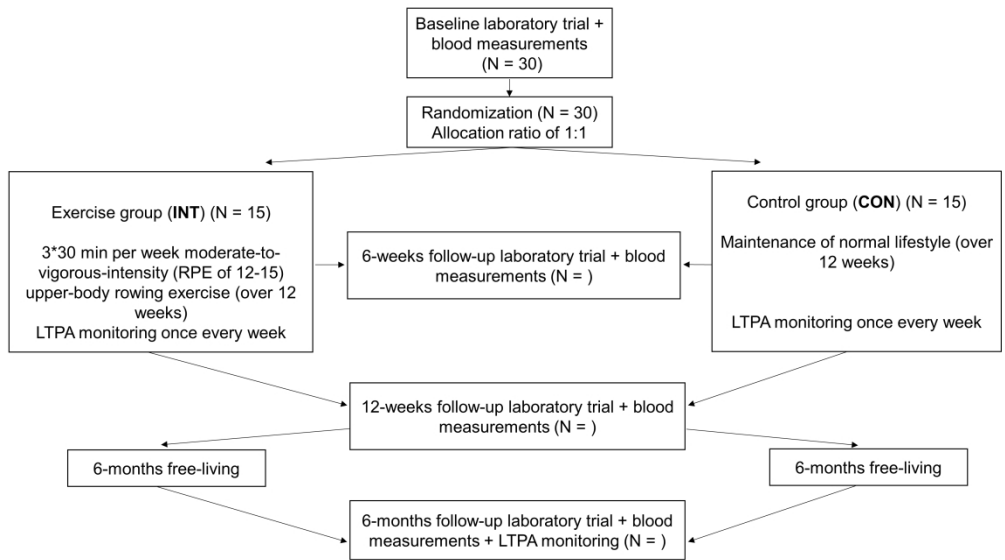

Figure 1. Study overview. INT = intervention; CON = control; RPE = rating of perceived exertion; LTPA = leisure time physical activity.

338x190mm (300 x 300 DPI)

1 Project title: Effect of wheelchair-modified rowing exercise on cardiometabolic risk factors in spinal cord  
2 injured wheelchair users  
3  
4  
5  
6

---

7 **Informed Consent to Participation in a Health Scientific Research Project**  
8

9 Title of the research project: Effect of wheelchair-modified rowing exercise on cardiometabolic risk factors  
10 in spinal cord injured wheelchair users  
11  
12

13 **Declaration by the Volunteer**

14 I have received information about the research project both in writing and orally, and I have sufficient  
15 knowledge of the objective, method, advantages and disadvantages to confirm my participation.  
16

17  
18 I know that participation is voluntary and that I can always withdraw my consent without losing my  
19 present or future rights to treatment.  
20

21 I hereby give my consent to participation in the research project and to taking out samples of my  
22 biological material for storage in a research bio-bank. I have received a copy of this form and of all  
23 written information about the project for my own use.  
24  
25

26 Name of the Volunteer: \_\_\_\_\_  
27

28 Date: \_\_\_\_\_ Signature: \_\_\_\_\_  
29

30  
31 If new, significant health information appears during the research project, you will be informed. If you  
32 wish to **decline** receipt of this information, please tick here: \_\_\_

33  
34 Would you like to be informed of the results of the research project and of the consequences for you, if  
35 any?

36 Yes \_\_\_\_\_ No \_\_\_\_\_ (tick the appropriate field)  
37  
38

39 **Declaration by the Person giving Information**

40 I hereby declare that the Volunteer has received information both in writing and orally about the research  
41 project.  
42

43 I believe that the information given is sufficient for making a decision on participation in the research  
44 project.  
45

46 Name of the person giving the information: \_\_\_\_\_  
47

48 Date: \_\_\_\_\_ Signature: \_\_\_\_\_  
49  
50

51  
52  
53 Project identification: N-20190053  
54  
55

---

56 Standard declaration of consent issued by Den Nationale Videnskabetiske Komité, December 2011.  
57 *Translation into English made by Center for Sensory-Motor Interaction, Aalborg University*  
58  
59  
60

# Reporting checklist for protocol of a clinical trial.

Based on the SPIRIT guidelines.

## Instructions to authors

Complete this checklist by entering the page numbers from your manuscript where readers will find each of the items listed below.

Your article may not currently address all the items on the checklist. Please modify your text to include the missing information. If you are certain that an item does not apply, please write "n/a" and provide a short explanation.

Upload your completed checklist as an extra file when you submit to a journal.

In your methods section, say that you used the SPIRIT reporting guidelines, and cite them as:

Chan A-W, Tetzlaff JM, Altman DG, Laupacis A, Gøtzsche PC, Krleža-Jerić K, Hróbjartsson A, Mann H, Dickersin K, Berlin J, Doré C, Parulekar W, Summerskill W, Groves T, Schulz K, Sox H, Rockhold FW, Rennie D, Moher D. SPIRIT 2013 Statement: Defining standard protocol items for clinical trials. *Ann Intern Med.* 2013;158(3):200-207

|                                   | Reporting Item                                                                                                                  | Page Number |
|-----------------------------------|---------------------------------------------------------------------------------------------------------------------------------|-------------|
| <b>Administrative information</b> |                                                                                                                                 |             |
| Title                             | <a href="#">#1</a> Descriptive title identifying the study design, population, interventions, and, if applicable, trial acronym | 1,3         |



|    |                     |                     |                                            |                                |
|----|---------------------|---------------------|--------------------------------------------|--------------------------------|
| 1  | Trial registration  | <a href="#">#2a</a> | Trial identifier and registry name. If not | 4,9                            |
| 2  |                     |                     | yet registered, name of intended           |                                |
| 3  |                     |                     | registry                                   |                                |
| 4  |                     |                     |                                            |                                |
| 5  |                     |                     |                                            |                                |
| 6  |                     |                     |                                            |                                |
| 7  |                     |                     |                                            |                                |
| 8  |                     |                     |                                            |                                |
| 9  | Trial registration: | <a href="#">#2b</a> | All items from the World Health            | n/a. The trial has been        |
| 10 |                     |                     | Organization Trial Registration Data       | registered with details        |
| 11 | data set            |                     | Set                                        | provided at Clinicaltrials.gov |
| 12 |                     |                     |                                            |                                |
| 13 |                     |                     |                                            |                                |
| 14 |                     |                     |                                            |                                |
| 15 |                     |                     |                                            |                                |
| 16 | Protocol version    | <a href="#">#3</a>  | Date and version identifier                | 1                              |
| 17 |                     |                     |                                            |                                |
| 18 |                     |                     |                                            |                                |
| 19 | Funding             | <a href="#">#4</a>  | Sources and types of financial,            | 20                             |
| 20 |                     |                     | material, and other support                |                                |
| 21 |                     |                     |                                            |                                |
| 22 |                     |                     |                                            |                                |
| 23 |                     |                     |                                            |                                |
| 24 |                     |                     |                                            |                                |
| 25 | Roles and           | <a href="#">#5a</a> | Names, affiliations, and roles of          | 1,2,20                         |
| 26 |                     |                     | protocol contributors                      |                                |
| 27 | responsibilities:   |                     |                                            |                                |
| 28 |                     |                     |                                            |                                |
| 29 | contributorship     |                     |                                            |                                |
| 30 |                     |                     |                                            |                                |
| 31 |                     |                     |                                            |                                |
| 32 | Roles and           | <a href="#">#5b</a> | Name and contact information for the       | 20                             |
| 33 |                     |                     | trial sponsor                              |                                |
| 34 | responsibilities:   |                     |                                            |                                |
| 35 |                     |                     |                                            |                                |
| 36 | sponsor contact     |                     |                                            |                                |
| 37 |                     |                     |                                            |                                |
| 38 | information         |                     |                                            |                                |
| 39 |                     |                     |                                            |                                |
| 40 |                     |                     |                                            |                                |
| 41 |                     |                     |                                            |                                |
| 42 | Roles and           | <a href="#">#5c</a> | Role of study sponsor and funders, if      | 20                             |
| 43 |                     |                     | any, in study design; collection,          |                                |
| 44 | responsibilities:   |                     | management, analysis, and                  |                                |
| 45 |                     |                     | interpretation of data; writing of the     |                                |
| 46 | sponsor and         |                     | report; and the decision to submit the     |                                |
| 47 |                     |                     | report for publication, including whether  |                                |
| 48 | funder              |                     |                                            |                                |
| 49 |                     |                     |                                            |                                |
| 50 |                     |                     |                                            |                                |
| 51 |                     |                     |                                            |                                |
| 52 |                     |                     |                                            |                                |
| 53 |                     |                     |                                            |                                |
| 54 |                     |                     |                                            |                                |
| 55 |                     |                     |                                            |                                |
| 56 |                     |                     |                                            |                                |
| 57 |                     |                     |                                            |                                |
| 58 |                     |                     |                                            |                                |
| 59 |                     |                     |                                            |                                |
| 60 |                     |                     |                                            |                                |

1 they will have ultimate authority over

2  
3 any of these activities

4  
5  
6 Roles and [#5d](#) Composition, roles, and responsibilities n/a. No such committee has  
7 responsibilities: of the coordinating centre, steering been established.  
8 committees committee, endpoint adjudication  
9  
10  
11  
12  
13 committee, data management team,  
14  
15 and other individuals or groups  
16  
17 overseeing the trial, if applicable (see  
18 Item 21a for data monitoring  
19  
20  
21  
22 committee)  
23  
24

## 25 Introduction

26  
27  
28 Background and [#6a](#) Description of research question and 6-8  
29 rationale justification for undertaking the trial,  
30  
31 including summary of relevant studies  
32  
33 (published and unpublished) examining  
34  
35 benefits and harms for each  
36  
37  
38  
39 intervention  
40  
41

42 Background and [#6b](#) Explanation for choice of comparators 6-8  
43 rationale: choice  
44  
45 of comparators  
46  
47  
48  
49

50 Objectives [#7](#) Specific objectives or hypotheses 8  
51  
52

53 Trial design [#8](#) Description of trial design including type 9  
54  
55 of trial (eg, parallel group, crossover,  
56  
57 factorial, single group), allocation ratio,  
58  
59

and framework (eg, superiority,  
equivalence, non-inferiority,  
exploratory)

## Methods:

### Participants, interventions, and outcomes

|    |                                 |                      |                                                                                                                                                                                                          |              |
|----|---------------------------------|----------------------|----------------------------------------------------------------------------------------------------------------------------------------------------------------------------------------------------------|--------------|
| 18 | Study setting                   | <a href="#">#9</a>   | Description of study settings (eg,<br>community clinic, academic hospital)<br>and list of countries where data will be<br>collected. Reference to where list of<br>study sites can be obtained           | 10,12        |
| 30 | Eligibility criteria            | <a href="#">#10</a>  | Inclusion and exclusion criteria for<br>participants. If applicable, eligibility<br>criteria for study centres and individuals<br>who will perform the interventions (eg,<br>surgeons, psychotherapists) | 9-10         |
| 42 | Interventions:<br>description   | <a href="#">#11a</a> | Interventions for each group with<br>sufficient detail to allow replication,<br>including how and when they will be<br>administered                                                                      | 10-11        |
| 52 | Interventions:<br>modifications | <a href="#">#11b</a> | Criteria for discontinuing or modifying<br>allocated interventions for a given trial<br>participant (eg, drug dose change in                                                                             | 10-11, 18-19 |

|    |                  |                                                         |       |
|----|------------------|---------------------------------------------------------|-------|
| 1  |                  | response to harms, participant request,                 |       |
| 2  |                  |                                                         |       |
| 3  |                  | or improving / worsening disease)                       |       |
| 4  |                  |                                                         |       |
| 5  |                  |                                                         |       |
| 6  | Interventions:   | <a href="#">#11c</a> Strategies to improve adherence to | 10    |
| 7  |                  |                                                         |       |
| 8  | adherence        | intervention protocols, and any                         |       |
| 9  |                  |                                                         |       |
| 10 |                  | procedures for monitoring adherence                     |       |
| 11 |                  |                                                         |       |
| 12 |                  | (eg, drug tablet return; laboratory tests)              |       |
| 13 |                  |                                                         |       |
| 14 |                  |                                                         |       |
| 15 |                  |                                                         |       |
| 16 | Interventions:   | <a href="#">#11d</a> Relevant concomitant care and      | 10-12 |
| 17 |                  |                                                         |       |
| 18 | concomitant care | interventions that are permitted or                     |       |
| 19 |                  |                                                         |       |
| 20 |                  | prohibited during the trial                             |       |
| 21 |                  |                                                         |       |
| 22 |                  |                                                         |       |
| 23 | Outcomes         | <a href="#">#12</a> Primary, secondary, and other       | 12-17 |
| 24 |                  |                                                         |       |
| 25 |                  | outcomes, including the specific                        |       |
| 26 |                  |                                                         |       |
| 27 |                  | measurement variable (eg, systolic                      |       |
| 28 |                  |                                                         |       |
| 29 |                  | blood pressure), analysis metric (eg,                   |       |
| 30 |                  |                                                         |       |
| 31 |                  | change from baseline, final value, time                 |       |
| 32 |                  |                                                         |       |
| 33 |                  | to event), method of aggregation (eg,                   |       |
| 34 |                  |                                                         |       |
| 35 |                  | median, proportion), and time point for                 |       |
| 36 |                  |                                                         |       |
| 37 |                  | each outcome. Explanation of the                        |       |
| 38 |                  |                                                         |       |
| 39 |                  | clinical relevance of chosen efficacy                   |       |
| 40 |                  |                                                         |       |
| 41 |                  | and harm outcomes is strongly                           |       |
| 42 |                  |                                                         |       |
| 43 |                  | recommended                                             |       |
| 44 |                  |                                                         |       |
| 45 |                  |                                                         |       |
| 46 |                  |                                                         |       |
| 47 |                  |                                                         |       |
| 48 |                  |                                                         |       |
| 49 | Participant      | <a href="#">#13</a> Time schedule of enrolment,         | 12    |
| 50 |                  |                                                         |       |
| 51 | timeline         | interventions (including any run-ins and                |       |
| 52 |                  |                                                         |       |
| 53 |                  | washouts), assessments, and visits for                  |       |
| 54 |                  |                                                         |       |
| 55 |                  | participants. A schematic diagram is                    |       |
| 56 |                  |                                                         |       |
| 57 |                  | highly recommended (see Figure)                         |       |
| 58 |                  |                                                         |       |
| 59 |                  |                                                         |       |
| 60 |                  |                                                         |       |

1 Sample size [#14](#) Estimated number of participants 10  
 2  
 3  
 4 needed to achieve study objectives and  
 5  
 6 how it was determined, including  
 7  
 8 clinical and statistical assumptions  
 9  
 10 supporting any sample size calculations  
 11  
 12

13 Recruitment [#15](#) Strategies for achieving adequate 10  
 14  
 15 participant enrolment to reach target  
 16  
 17 sample size  
 18  
 19  
 20

## 21 Methods:

### 22 Assignment of 23 interventions (for 24 controlled trials)

25 Allocation: [#16a](#) Method of generating the allocation 9  
 26  
 27 sequence sequence (eg, computer-generated  
 28  
 29 generation random numbers), and list of any  
 30  
 31 factors for stratification. To reduce  
 32  
 33 predictability of a random sequence,  
 34  
 35 details of any planned restriction (eg,  
 36  
 37 blocking) should be provided in a  
 38  
 39 separate document that is unavailable  
 40  
 41 to those who enrol participants or  
 42  
 43 assign interventions  
 44  
 45  
 46  
 47  
 48  
 49  
 50  
 51  
 52  
 53  
 54  
 55  
 56  
 57  
 58  
 59  
 60

|    |                      |                      |                                             |                                 |
|----|----------------------|----------------------|---------------------------------------------|---------------------------------|
| 1  | Allocation           | <a href="#">#16b</a> | Mechanism of implementing the               | 9                               |
| 2  |                      |                      |                                             |                                 |
| 3  | concealment          |                      | allocation sequence (eg, central            |                                 |
| 4  |                      |                      |                                             |                                 |
| 5  | mechanism            |                      | telephone; sequentially numbered,           |                                 |
| 6  |                      |                      |                                             |                                 |
| 7  |                      |                      |                                             |                                 |
| 8  |                      |                      | opaque, sealed envelopes), describing       |                                 |
| 9  |                      |                      |                                             |                                 |
| 10 |                      |                      | any steps to conceal the sequence until     |                                 |
| 11 |                      |                      |                                             |                                 |
| 12 |                      |                      | interventions are assigned                  |                                 |
| 13 |                      |                      |                                             |                                 |
| 14 |                      |                      |                                             |                                 |
| 15 | Allocation:          | <a href="#">#16c</a> | Who will generate the allocation            | 9-10                            |
| 16 |                      |                      |                                             |                                 |
| 17 | implementation       |                      | sequence, who will enrol participants,      |                                 |
| 18 |                      |                      |                                             |                                 |
| 19 |                      |                      | and who will assign participants to         |                                 |
| 20 |                      |                      |                                             |                                 |
| 21 |                      |                      | interventions                               |                                 |
| 22 |                      |                      |                                             |                                 |
| 23 |                      |                      |                                             |                                 |
| 24 |                      |                      |                                             |                                 |
| 25 | Blinding (masking)   | <a href="#">#17a</a> | Who will be blinded after assignment to     | 15                              |
| 26 |                      |                      |                                             |                                 |
| 27 |                      |                      | interventions (eg, trial participants, care |                                 |
| 28 |                      |                      |                                             |                                 |
| 29 |                      |                      | providers, outcome assessors, data          |                                 |
| 30 |                      |                      |                                             |                                 |
| 31 |                      |                      | analysts), and how                          |                                 |
| 32 |                      |                      |                                             |                                 |
| 33 |                      |                      |                                             |                                 |
| 34 |                      |                      |                                             |                                 |
| 35 | Blinding             | <a href="#">#17b</a> | If blinded, circumstances under which       | n/a. Participants allocated to  |
| 36 |                      |                      |                                             |                                 |
| 37 | (masking):           |                      | unblinding is permissible, and              | the exercise and control        |
| 38 |                      |                      |                                             |                                 |
| 39 | emergency            |                      | procedure for revealing a participant's     | group cannot be blinded to      |
| 40 |                      |                      |                                             |                                 |
| 41 | unblinding           |                      | allocated intervention during the trial     | the PI, because PI is           |
| 42 |                      |                      |                                             |                                 |
| 43 |                      |                      |                                             |                                 |
| 44 |                      |                      |                                             |                                 |
| 45 |                      |                      |                                             | responsible for conducting      |
| 46 |                      |                      |                                             |                                 |
| 47 |                      |                      |                                             | the study. Parts of data        |
| 48 |                      |                      |                                             |                                 |
| 49 |                      |                      |                                             | analysis will be blinded to the |
| 50 |                      |                      |                                             |                                 |
| 51 |                      |                      |                                             | PI.                             |
| 52 |                      |                      |                                             |                                 |
| 53 |                      |                      |                                             |                                 |
| 54 | <b>Methods: Data</b> |                      |                                             |                                 |
| 55 |                      |                      |                                             |                                 |
| 56 | <b>collection,</b>   |                      |                                             |                                 |
| 57 |                      |                      |                                             |                                 |
| 58 |                      |                      |                                             |                                 |
| 59 |                      |                      |                                             |                                 |
| 60 |                      |                      |                                             |                                 |

1 **management, and**

2  
3 **analysis**

|    |                 |                      |                                               |
|----|-----------------|----------------------|-----------------------------------------------|
| 4  |                 |                      |                                               |
| 5  |                 |                      |                                               |
| 6  | Data collection | <a href="#">#18a</a> | Plans for assessment and collection of 12-17  |
| 7  |                 |                      |                                               |
| 8  | plan            |                      | outcome, baseline, and other trial data,      |
| 9  |                 |                      |                                               |
| 10 |                 |                      | including any related processes to            |
| 11 |                 |                      |                                               |
| 12 |                 |                      | promote data quality (eg, duplicate           |
| 13 |                 |                      |                                               |
| 14 |                 |                      | measurements, training of assessors)          |
| 15 |                 |                      |                                               |
| 16 |                 |                      | and a description of study instruments        |
| 17 |                 |                      |                                               |
| 18 |                 |                      | (eg, questionnaires, laboratory tests)        |
| 19 |                 |                      |                                               |
| 20 |                 |                      | along with their reliability and validity, if |
| 21 |                 |                      |                                               |
| 22 |                 |                      | known. Reference to where data                |
| 23 |                 |                      |                                               |
| 24 |                 |                      | collection forms can be found, if not in      |
| 25 |                 |                      |                                               |
| 26 |                 |                      | the protocol                                  |
| 27 |                 |                      |                                               |
| 28 |                 |                      |                                               |
| 29 |                 |                      |                                               |
| 30 |                 |                      |                                               |
| 31 | Data collection | <a href="#">#18b</a> | Plans to promote participant retention 18     |
| 32 |                 |                      |                                               |
| 33 | plan: retention |                      | and complete follow-up, including list of     |
| 34 |                 |                      |                                               |
| 35 |                 |                      | any outcome data to be collected for          |
| 36 |                 |                      |                                               |
| 37 |                 |                      | participants who discontinue or deviate       |
| 38 |                 |                      |                                               |
| 39 |                 |                      | from intervention protocols                   |
| 40 |                 |                      |                                               |
| 41 |                 |                      |                                               |
| 42 |                 |                      |                                               |
| 43 | Data management | <a href="#">#19</a>  | Plans for data entry, coding, security, 19-20 |
| 44 |                 |                      |                                               |
| 45 |                 |                      | and storage, including any related            |
| 46 |                 |                      |                                               |
| 47 |                 |                      | processes to promote data quality (eg,        |
| 48 |                 |                      |                                               |
| 49 |                 |                      | double data entry; range checks for           |
| 50 |                 |                      |                                               |
| 51 |                 |                      | data values). Reference to where              |
| 52 |                 |                      |                                               |
| 53 |                 |                      | details of data management procedures         |
| 54 |                 |                      |                                               |
| 55 |                 |                      | can be found, if not in the protocol          |
| 56 |                 |                      |                                               |
| 57 |                 |                      |                                               |
| 58 |                 |                      |                                               |
| 59 |                 |                      |                                               |
| 60 |                 |                      |                                               |

|    |                      |                      |                                            |     |
|----|----------------------|----------------------|--------------------------------------------|-----|
| 1  | Statistics:          | <a href="#">#20a</a> | Statistical methods for analysing          | 18  |
| 2  |                      |                      |                                            |     |
| 3  | outcomes             |                      | primary and secondary outcomes.            |     |
| 4  |                      |                      |                                            |     |
| 5  |                      |                      | Reference to where other details of the    |     |
| 6  |                      |                      | statistical analysis plan can be found, if |     |
| 7  |                      |                      |                                            |     |
| 8  |                      |                      | not in the protocol                        |     |
| 9  |                      |                      |                                            |     |
| 10 |                      |                      |                                            |     |
| 11 |                      |                      |                                            |     |
| 12 |                      |                      |                                            |     |
| 13 | Statistics:          | <a href="#">#20b</a> | Methods for any additional analyses        | 18  |
| 14 |                      |                      |                                            |     |
| 15 | additional           |                      | (eg, subgroup and adjusted analyses)       |     |
| 16 |                      |                      |                                            |     |
| 17 | analyses             |                      |                                            |     |
| 18 |                      |                      |                                            |     |
| 19 |                      |                      |                                            |     |
| 20 |                      |                      |                                            |     |
| 21 | Statistics: analysis | <a href="#">#20c</a> | Definition of analysis population relating | 18  |
| 22 |                      |                      |                                            |     |
| 23 | population and       |                      | to protocol non-adherence (eg, as          |     |
| 24 |                      |                      |                                            |     |
| 25 | missing data         |                      | randomised analysis), and any              |     |
| 26 |                      |                      |                                            |     |
| 27 |                      |                      | statistical methods to handle missing      |     |
| 28 |                      |                      |                                            |     |
| 29 |                      |                      | data (eg, multiple imputation)             |     |
| 30 |                      |                      |                                            |     |
| 31 |                      |                      |                                            |     |
| 32 |                      |                      |                                            |     |
| 33 | <b>Methods:</b>      |                      |                                            |     |
| 34 |                      |                      |                                            |     |
| 35 | <b>Monitoring</b>    |                      |                                            |     |
| 36 |                      |                      |                                            |     |
| 37 |                      |                      |                                            |     |
| 38 | Data monitoring:     | <a href="#">#21a</a> | Composition of data monitoring             | n/a |
| 39 |                      |                      |                                            |     |
| 40 | formal committee     |                      | committee (DMC); summary of its role       |     |
| 41 |                      |                      |                                            |     |
| 42 |                      |                      | and reporting structure; statement of      |     |
| 43 |                      |                      |                                            |     |
| 44 |                      |                      | whether it is independent from the         |     |
| 45 |                      |                      |                                            |     |
| 46 |                      |                      | sponsor and competing interests; and       |     |
| 47 |                      |                      |                                            |     |
| 48 |                      |                      | reference to where further details about   |     |
| 49 |                      |                      |                                            |     |
| 50 |                      |                      | its charter can be found, if not in the    |     |
| 51 |                      |                      |                                            |     |
| 52 |                      |                      | protocol. Alternatively, an explanation    |     |
| 53 |                      |                      |                                            |     |
| 54 |                      |                      | of why a DMC is not needed                 |     |
| 55 |                      |                      |                                            |     |
| 56 |                      |                      |                                            |     |
| 57 |                      |                      |                                            |     |
| 58 |                      |                      |                                            |     |
| 59 |                      |                      |                                            |     |
| 60 |                      |                      |                                            |     |



|    |                      |                      |                                           |       |
|----|----------------------|----------------------|-------------------------------------------|-------|
| 1  | Data monitoring:     | <a href="#">#21b</a> | Description of any interim analyses and   | n/a   |
| 2  |                      |                      |                                           |       |
| 3  | interim analysis     |                      | stopping guidelines, including who will   |       |
| 4  |                      |                      | have access to these interim results      |       |
| 5  |                      |                      | and make the final decision to            |       |
| 6  |                      |                      | terminate the trial                       |       |
| 7  |                      |                      |                                           |       |
| 8  |                      |                      |                                           |       |
| 9  |                      |                      |                                           |       |
| 10 |                      |                      |                                           |       |
| 11 |                      |                      |                                           |       |
| 12 |                      |                      |                                           |       |
| 13 | Harms                | <a href="#">#22</a>  | Plans for collecting, assessing,          | 18-19 |
| 14 |                      |                      | reporting, and managing solicited and     |       |
| 15 |                      |                      | spontaneously reported adverse events     |       |
| 16 |                      |                      | and other unintended effects of trial     |       |
| 17 |                      |                      | interventions or trial conduct            |       |
| 18 |                      |                      |                                           |       |
| 19 |                      |                      |                                           |       |
| 20 |                      |                      |                                           |       |
| 21 |                      |                      |                                           |       |
| 22 |                      |                      |                                           |       |
| 23 |                      |                      |                                           |       |
| 24 |                      |                      |                                           |       |
| 25 | Auditing             | <a href="#">#23</a>  | Frequency and procedures for auditing     | 19    |
| 26 |                      |                      | trial conduct, if any, and whether the    |       |
| 27 |                      |                      | process will be independent from          |       |
| 28 |                      |                      | investigators and the sponsor             |       |
| 29 |                      |                      |                                           |       |
| 30 |                      |                      |                                           |       |
| 31 |                      |                      |                                           |       |
| 32 |                      |                      |                                           |       |
| 33 |                      |                      |                                           |       |
| 34 |                      |                      |                                           |       |
| 35 | <b>Ethics and</b>    |                      |                                           |       |
| 36 | <b>dissemination</b> |                      |                                           |       |
| 37 |                      |                      |                                           |       |
| 38 |                      |                      |                                           |       |
| 39 |                      |                      |                                           |       |
| 40 |                      |                      |                                           |       |
| 41 | Research ethics      | <a href="#">#24</a>  | Plans for seeking research ethics         | 19    |
| 42 | approval             |                      | committee / institutional review board    |       |
| 43 |                      |                      | (REC / IRB) approval                      |       |
| 44 |                      |                      |                                           |       |
| 45 |                      |                      |                                           |       |
| 46 |                      |                      |                                           |       |
| 47 |                      |                      |                                           |       |
| 48 | Protocol             | <a href="#">#25</a>  | Plans for communicating important         | 19    |
| 49 | amendments           |                      | protocol modifications (eg, changes to    |       |
| 50 |                      |                      | eligibility criteria, outcomes, analyses) |       |
| 51 |                      |                      | to relevant parties (eg, investigators,   |       |
| 52 |                      |                      |                                           |       |
| 53 |                      |                      |                                           |       |
| 54 |                      |                      |                                           |       |
| 55 |                      |                      |                                           |       |
| 56 |                      |                      |                                           |       |
| 57 |                      |                      |                                           |       |
| 58 |                      |                      |                                           |       |
| 59 |                      |                      |                                           |       |
| 60 |                      |                      |                                           |       |

|    |                    |                                                             |       |
|----|--------------------|-------------------------------------------------------------|-------|
| 1  |                    | REC / IRBs, trial participants, trial                       |       |
| 2  |                    |                                                             |       |
| 3  |                    | registries, journals, regulators)                           |       |
| 4  |                    |                                                             |       |
| 5  |                    |                                                             |       |
| 6  | Consent or assent  | <a href="#">#26a</a> Who will obtain informed consent or    | 9     |
| 7  |                    |                                                             |       |
| 8  |                    | assent from potential trial participants                    |       |
| 9  |                    |                                                             |       |
| 10 |                    | or authorised surrogates, and how (see                      |       |
| 11 |                    |                                                             |       |
| 12 |                    | Item 32)                                                    |       |
| 13 |                    |                                                             |       |
| 14 |                    |                                                             |       |
| 15 | Consent or         | <a href="#">#26b</a> Additional consent provisions for      | n/a   |
| 16 |                    |                                                             |       |
| 17 | assent: ancillary  | collection and use of participant data                      |       |
| 18 |                    |                                                             |       |
| 19 |                    | and biological specimens in ancillary                       |       |
| 20 | studies            | studies, if applicable                                      |       |
| 21 |                    |                                                             |       |
| 22 |                    |                                                             |       |
| 23 |                    |                                                             |       |
| 24 |                    |                                                             |       |
| 25 | Confidentiality    | <a href="#">#27</a> How personal information about          | 19-20 |
| 26 |                    |                                                             |       |
| 27 |                    | potential and enrolled participants will                    |       |
| 28 |                    |                                                             |       |
| 29 |                    | be collected, shared, and maintained in                     |       |
| 30 |                    |                                                             |       |
| 31 |                    | order to protect confidentiality before,                    |       |
| 32 |                    |                                                             |       |
| 33 |                    | during, and after the trial                                 |       |
| 34 |                    |                                                             |       |
| 35 |                    |                                                             |       |
| 36 |                    |                                                             |       |
| 37 | Declaration of     | <a href="#">#28</a> Financial and other competing interests | 20    |
| 38 |                    |                                                             |       |
| 39 | interests          | for principal investigators for the overall                 |       |
| 40 |                    |                                                             |       |
| 41 |                    | trial and each study site                                   |       |
| 42 |                    |                                                             |       |
| 43 |                    |                                                             |       |
| 44 |                    |                                                             |       |
| 45 | Data access        | <a href="#">#29</a> Statement of who will have access to    | 19-20 |
| 46 |                    |                                                             |       |
| 47 |                    | the final trial dataset, and disclosure of                  |       |
| 48 |                    |                                                             |       |
| 49 |                    | contractual agreements that limit such                      |       |
| 50 |                    |                                                             |       |
| 51 |                    | access for investigators                                    |       |
| 52 |                    |                                                             |       |
| 53 |                    |                                                             |       |
| 54 |                    |                                                             |       |
| 55 | Ancillary and post | <a href="#">#30</a> Provisions, if any, for ancillary and   | n/a   |
| 56 |                    |                                                             |       |
| 57 | trial care         | post-trial care, and for compensation to                    |       |
| 58 |                    |                                                             |       |
| 59 |                    |                                                             |       |
| 60 |                    |                                                             |       |

|    |                       |                                                                |       |
|----|-----------------------|----------------------------------------------------------------|-------|
| 1  |                       | those who suffer harm from trial                               |       |
| 2  |                       |                                                                |       |
| 3  |                       | participation                                                  |       |
| 4  |                       |                                                                |       |
| 5  |                       |                                                                |       |
| 6  | Dissemination         | <a href="#">#31a</a> Plans for investigators and sponsor to    | 18-19 |
| 7  |                       |                                                                |       |
| 8  | policy: trial results | communicate trial results to                                   |       |
| 9  |                       |                                                                |       |
| 10 |                       | participants, healthcare professionals,                        |       |
| 11 |                       |                                                                |       |
| 12 |                       | the public, and other relevant groups                          |       |
| 13 |                       |                                                                |       |
| 14 |                       | (eg, via publication, reporting in results                     |       |
| 15 |                       | databases, or other data sharing                               |       |
| 16 |                       | arrangements), including any                                   |       |
| 17 |                       |                                                                |       |
| 18 |                       | publication restrictions                                       |       |
| 19 |                       |                                                                |       |
| 20 |                       |                                                                |       |
| 21 |                       |                                                                |       |
| 22 |                       |                                                                |       |
| 23 |                       |                                                                |       |
| 24 | Dissemination         | <a href="#">#31b</a> Authorship eligibility guidelines and any | 20    |
| 25 |                       |                                                                |       |
| 26 | policy: authorship    | intended use of professional writers                           |       |
| 27 |                       |                                                                |       |
| 28 |                       |                                                                |       |
| 29 |                       |                                                                |       |
| 30 | Dissemination         | <a href="#">#31c</a> Plans, if any, for granting public access | n/a   |
| 31 |                       |                                                                |       |
| 32 | policy:               | to the full protocol, participant-level                        |       |
| 33 |                       |                                                                |       |
| 34 | reproducible          | dataset, and statistical code                                  |       |
| 35 |                       |                                                                |       |
| 36 |                       |                                                                |       |
| 37 | research              |                                                                |       |
| 38 |                       |                                                                |       |
| 39 |                       |                                                                |       |
| 40 | <b>Appendices</b>     |                                                                |       |
| 41 |                       |                                                                |       |
| 42 |                       |                                                                |       |
| 43 | Informed consent      | <a href="#">#32</a> Model consent form and other related       | 9     |
| 44 |                       |                                                                |       |
| 45 | materials             | documentation given to participants                            |       |
| 46 |                       |                                                                |       |
| 47 |                       | and authorised surrogates                                      |       |
| 48 |                       |                                                                |       |
| 49 |                       |                                                                |       |
| 50 |                       |                                                                |       |
| 51 | Biological            | <a href="#">#33</a> Plans for collection, laboratory           | 12    |
| 52 |                       |                                                                |       |
| 53 | specimens             | evaluation, and storage of biological                          |       |
| 54 |                       |                                                                |       |
| 55 |                       | specimens for genetic or molecular                             |       |
| 56 |                       |                                                                |       |
| 57 |                       | analysis in the current trial and for                          |       |
| 58 |                       |                                                                |       |
| 59 |                       |                                                                |       |
| 60 |                       |                                                                |       |

1 future use in ancillary studies, if

2  
3 applicable

4  
5  
6 None The SPIRIT checklist is distributed under the terms of the Creative Commons Attribution

7  
8 License CC-BY-ND 3.0. This checklist can be completed online using <https://www.goodreports.org/>, a

9  
10 tool made by the [EQUATOR Network](#) in collaboration with [Penelope.ai](#)

11  
12  
13  
14  
15  
16  
17  
18  
19  
20  
21  
22  
23  
24  
25  
26  
27  
28  
29  
30  
31  
32  
33  
34  
35  
36  
37  
38  
39  
40  
41  
42  
43  
44  
45  
46  
47  
48  
49  
50  
51  
52  
53  
54  
55  
56  
57  
58  
59  
60

For peer review only
