# Supplementary material for: Effect of wheelchair-modified rowing exercise on cardiometabolic risk factors in spinal cord injured wheelchair users: protocol for a randomised controlled trial
Source: PubMed Central journal article supplement — BMJ Open. 2020 Oct 16;10(10):e040727. doi: 10.1136/bmjopen-2020-040727 (PMC7569950; doi:10.1136/bmjopen-2020-040727), 2020-10-16
Supplement: bmjopen-2020-040727supp001.pdf [file bmjopen-2020-040727supp001.pdf]

Project title: Effect of wheelchair-modified rowing exercise on cardiometabolic risk factors in spinal cord injured wheelchair users

---

### **Informed Consent to Participation in a Health Scientific Research Project**

Title of the research project: Effect of wheelchair-modified rowing exercise on cardiometabolic risk factors in spinal cord injured wheelchair users

#### **Declaration by the Volunteer**

I have received information about the research project both in writing and orally, and I have sufficient knowledge of the objective, method, advantages and disadvantages to confirm my participation.

I know that participation is voluntary and that I can always withdraw my consent without losing my present or future rights to treatment.

I hereby give my consent to participation in the research project and to taking out samples of my biological material for storage in a research bio-bank. I have received a copy of this form and of all written information about the project for my own use.

Name of the Volunteer: \_\_\_\_\_

Date: \_\_\_\_\_ Signature: \_\_\_\_\_

If new, significant health information appears during the research project, you will be informed. If you wish to **decline** receipt of this information, please tick here:

Would you like to be informed of the results of the research project and of the consequences for you, if any?

Yes  No  (tick the appropriate field)

#### **Declaration by the Person giving Information**

I hereby declare that the Volunteer has received information both in writing and orally about the research project.

I believe that the information given is sufficient for making a decision on participation in the research project.

Name of the person giving the information: \_\_\_\_\_

Date: \_\_\_\_\_ Signature: \_\_\_\_\_

Project identification: N-20190053

---

Standard declaration of consent issued by Den Nationale Videnskabetiske Komité, December 2011.  
*Translation into English made by Center for Sensory-Motor Interaction, Aalborg University*
